# Supplementary material for: GNPS‐Guided Discovery of Madurastatin Siderophores from the Termite‐Associated Actinomadura sp. RB99
Source: PubMed Central journal article supplement — Chemistry. 2022 May 19;28(36):e202200612. doi: 10.1002/chem.202200612 (PMC9325478; doi:10.1002/chem.202200612), 2022-05-19
Supplement: CHEM-28-0-s001.pdf [file CHEM-28-0-s001.pdf]

# Chemistry–A European Journal

Supporting Information

## **GNPS-Guided Discovery of Madurastatin Siderophores from the Termite-Associated *Actinomadura* sp. RB99**

Seoung Rak Lee, Felix Schalk, Jan W. Schwitalla, Huijuan Guo, Jae Sik Yu, Moonyong Song,  
Won Hee Jung, Z. Wilhelm de Beer, Christine Beemelmans,\* and Ki Hyun Kim\*

## Contents

|                                                                                |     |
|--------------------------------------------------------------------------------|-----|
| 1. General Experimental Procedures .....                                       | 5   |
| 2. Cultivation and extraction of <i>Actinomadura</i> sp. RB99 .....            | 6   |
| 3. Co-Cultivation Studies .....                                                | 7   |
| 4. CAS Activity test.....                                                      | 10  |
| 5. Analytical procedures.....                                                  | 11  |
| 6. Time-resolved analysis of siderophore production in different media.....    | 16  |
| 7. Extraction and Isolation of Compounds .....                                 | 17  |
| 8. Structure Elucidation of Isolated Compounds.....                            | 18  |
| 9. Marfey`s analysis .....                                                     | 28  |
| 10. Physical data of isolated compounds.....                                   | 30  |
| 11. Analytical Data.....                                                       | 31  |
| 12. Computational analysis .....                                               | 90  |
| 13. Bioactivities.....                                                         | 97  |
| 14. Biosynthetic Pathway Analysis and Construction of phylogenetic trees ..... | 98  |
| 15. References .....                                                           | 106 |

|                                                                                                                                                                                                                                                                                                                                                                                                                                                                                                                                                                                       |    |
|---------------------------------------------------------------------------------------------------------------------------------------------------------------------------------------------------------------------------------------------------------------------------------------------------------------------------------------------------------------------------------------------------------------------------------------------------------------------------------------------------------------------------------------------------------------------------------------|----|
| Figure S1. Exemplary CAS siderophore assay of bacterial extracts (1 mg/mL). Measurement of duplicates of: (1) MeOH (negative control), (2) 1 mM EDTA (positive control), (3-5) extracts derived from cultures grown on (3) ISP5 sea salt, (4) ISP5 sea salt with low Fe-content, and (5) ISP5 sea salt depleted of Fe. A) after 45 min and B) after 90 min. Orange color indicates iron binding activity. Screening was performed in duplicates, n= 2. ....                                                                                                                           | 10 |
| Figure S2. CAS siderophore assay of methanolic extracts obtained from bacterial cultures grown under different iron conditions. MeOH was used as negative control and 1 mM EDTA was used as positive control. Error bars indicate $\pm 0.5$ standard deviation, n = 2. ....                                                                                                                                                                                                                                                                                                           | 10 |
| <b>Figure S3.</b> Exemplary co-culture analysis and section of zones used for metabolite extraction and analysis. ....                                                                                                                                                                                                                                                                                                                                                                                                                                                                | 11 |
| <b>Figure S4.</b> Exemplary analysis of co-culture sample ( <i>Actinomadura</i> sp. RB99 versus <i>Pseudoxylaria</i> sp. X802) using network cluster analysis via GNPS platform and visualized by Cytoscape (red: bacterial zone, blue inhibition zone, green: fungal mycelium, yellow: methanol blank, see <b>Figure S3</b> ). Dereplicated GNPS clusters: A) phosphoethanolamines, B) phosphocholines, C) oligosaccharides, D) pseudoxyllallemycins, and E) cytochalasins. ....                                                                                                     | 12 |
| Figure S5. Exemplary analysis of co-culture sample ( <i>Actinomadura</i> sp. RB99 versus <i>Pseudoxylaria</i> sp. 187) using network cluster analysis via GNPS platform and visualized using Cytoscape (red: bacterial zone, blue inhibition zone, green: fungal mycelium, yellow: methanol blank, see Figure S3). Dereplicated GNPS clusters: A) xylacremolide, B) pseudoxyllaramide, C) oligosaccharides, D) phospholipids (phosphoethanolamines).....                                                                                                                              | 13 |
| Figure S6. GNPS cluster from SPE fraction eluted by 40% MeOH and 60% MeOH. Cyan nodes represent the 40% MeOH fraction, and blue nodes represent the 60% MeOH fraction. A) ‘oxazoline’ containing subcluster ( $m/z$ 606.288: madurastatin A1; $m/z$ 592.277: madurastatin C1); B) ‘serine’ containing subcluster ( $m/z$ 624.3: madurastatin A2; C) Fe-adducts of ‘oxazoline’ containing subcluster: $m/z$ 659.201: Fe-madurastatin A1).....                                                                                                                                          | 14 |
| Figure S7. LCMS/MS spectra of oxazoline containing derivatives. Red arrow highlights the diagnostic fragment ion at $m/z$ 162.0551. ....                                                                                                                                                                                                                                                                                                                                                                                                                                              | 14 |
| Figure S8. LCMS/MS spectra of serine containing derivatives. Red arrow highlights the diagnostic fragment ion at $m/z$ 208.0607. ....                                                                                                                                                                                                                                                                                                                                                                                                                                                 | 15 |
| Figure S9. LCMS/MS spectra of Fe adduct of oxazoline containing derivatives. ....                                                                                                                                                                                                                                                                                                                                                                                                                                                                                                     | 15 |
| Figure S10. Quantification of siderophore production by <i>Actinomadura</i> sp. RB99 A) 1 $m/z$ $[M+H]^+$ 624.2988, and B) 2 $m/z$ $[M+H]^+$ 636.2988 after two, four and eight days of cultivation in different media. Intensity units at $10^6$ auc. Error bars indicate $\pm 0.5$ standard deviation, duplicates n=2. C-D) Determination of production tiers for $m/z$ $[M+H]^+$ 624.2988 and $m/z$ $[M+H]^+$ 624.2988 after eight days when cultivated in media containing different iron concentrations. Error bars indicate $\pm 0.5$ standard deviation, triplicates n=3. .... | 16 |
| <b>Figure S11.</b> Chemical structures of <b>1</b> and 2D NMR data and MS/MS fragment ions of <b>1</b> . The dashed lines show the fragments obtained in a tandem MS experiment. Blue bonds indicate $^1H$ - $^1H$ COSY correlations and pink arrows indicated HMBC correlations. The depicted numbers indicate the corresponding $m/z$ values.....                                                                                                                                                                                                                                   | 19 |
| <b>Figure S12.</b> MS <sup>2</sup> spectrum of <b>1</b> at $m/z$ 624.2998 $[M+H]^+$ ( $C_{27}H_{42}N_7O_{10}^+$ , calcd. 624.2993).....                                                                                                                                                                                                                                                                                                                                                                                                                                               | 19 |
| <b>Figure S13.</b> Chemical structure of madurastatin A1 ( <b>5</b> ) and 2D NMR data of <b>5</b> (Ga complex) and MS/MS fragment ions of <b>5</b> (apo form). Blue bonds indicate $^1H$ - $^1H$ COSY correlations and pink arrows indicated HMBC correlations. ....                                                                                                                                                                                                                                                                                                                  | 20 |
| <b>Figure S14.</b> 2D NMR data and MS/MS fragment ion pattern of <b>2</b> . Blue bonds indicate $^1H$ - $^1H$ COSY correlations and pink arrows indicated HMBC correlations. ....                                                                                                                                                                                                                                                                                                                                                                                                     | 21 |
| <b>Figure S15.</b> 2D NMR data and MS/MS fragment ion pattern of <b>3</b> . Blue bonds indicate $^1H$ - $^1H$ COSY correlations and pink arrows indicated HMBC correlations. ....                                                                                                                                                                                                                                                                                                                                                                                                     | 23 |
| Figure S16. 2D NMR data and MS/MS fragment ion pattern of <b>4</b> . Blue bonds indicate $^1H$ - $^1H$ COSY correlations and pink arrows indicated HMBC correlations. ....                                                                                                                                                                                                                                                                                                                                                                                                            | 24 |
| Figure S17. Proposed structure of <b>6</b> based on MS <sup>2</sup> fragmentation.....                                                                                                                                                                                                                                                                                                                                                                                                                                                                                                | 25 |
| Figure S18. MS <sup>2</sup> spectrum of <b>6</b> at $m/z$ 610.2829 $[M+H]^+$ ( $C_{26}H_{40}N_7O_{10}^+$ , calcd. 610.2831).....                                                                                                                                                                                                                                                                                                                                                                                                                                                      | 25 |
| Figure S19. Comparison of partial MS <sup>2</sup> of <b>1</b> (A) and <b>6</b> (B) used for confirmation of an alanine to glycine substitution. Corresponding unique key fragments $m/z$ 143.0815 ( <b>1</b> , A) and $m/z$ 129.0659 ( <b>6</b> , B) are                                                                                                                                                                                                                                                                                                                              |    |

|                                                                                                                                                                                                                                                                                            |    |
|--------------------------------------------------------------------------------------------------------------------------------------------------------------------------------------------------------------------------------------------------------------------------------------------|----|
| highlighted in red. ....                                                                                                                                                                                                                                                                   | 26 |
| Figure S20. Proposed structure of <b>7</b> based on MS <sup>2</sup> fragmentation.....                                                                                                                                                                                                     | 26 |
| Figure S21. Comparison of partial MS <sup>2</sup> of <b>1</b> (A) and <b>7</b> (B) used for confirmation of an alanine to serine substitution. Corresponding unique key fragments <i>m/z</i> 161.0921 ( <b>1</b> , A) and <i>m/z</i> 177.0865 ( <b>7</b> , B) are highlighted in red. .... | 27 |
| <b>Figure S22.</b> MS <sup>2</sup> spectrum of <b>7</b> at <i>m/z</i> 640.2947 [M+H] <sup>+</sup> (C <sub>27</sub> H <sub>42</sub> N <sub>7</sub> O <sub>11</sub> <sup>+</sup> , calcd. 640.2937).....                                                                                     | 27 |
| <b>Figure 23.</b> <sup>1</sup> H NMR spectrum of madurastatin A2 ( <b>1</b> ) (CD <sub>3</sub> OD, 800 MHz).....                                                                                                                                                                           | 35 |
| Figure S24. <sup>1</sup> H- <sup>1</sup> H COSY spectrum of madurastatin A2 ( <b>1</b> ) (CD <sub>3</sub> OD, 800 MHz).....                                                                                                                                                                | 36 |
| Figure S25. HSQC spectrum of madurastatin A2 ( <b>1</b> ) (CD <sub>3</sub> OD, 800 MHz).....                                                                                                                                                                                               | 37 |
| Figure S26. HMBC spectrum of madurastatin A2 ( <b>1</b> ) (CD <sub>3</sub> OD, 800 MHz).....                                                                                                                                                                                               | 38 |
| Figure S27. ROESY spectrum of madurastatin A2 ( <b>1</b> ) (CD <sub>3</sub> OD, 800 MHz).....                                                                                                                                                                                              | 39 |
| Figure 28. ECD spectrum of madurastatin A2 ( <b>1</b> ) (MeOH).....                                                                                                                                                                                                                        | 40 |
| <b>Figure S29.</b> HR-ESIMS spectrum of madurastatin A2 ( <b>1</b> ).....                                                                                                                                                                                                                  | 41 |
| Figure S30. Partial MS <sup>2</sup> -spectrum of <b>1</b> showing the presence of diagnostic key fragment <i>m/z</i> 161.09212 and absence of key fragment <i>m/z</i> 177.08647.....                                                                                                       | 41 |
| Figure S31. <sup>1</sup> H NMR spectrum of madurastatin E1 ( <b>2</b> ) (CD <sub>3</sub> OD, 800 MHz).....                                                                                                                                                                                 | 42 |
| Figure S32. <sup>1</sup> H- <sup>1</sup> H COSY spectrum of madurastatin E1 ( <b>2</b> ) (CD <sub>3</sub> OD, 800 MHz).....                                                                                                                                                                | 43 |
| Figure S33. HSQC spectrum of madurastatin E1 ( <b>2</b> ) (CD <sub>3</sub> OD, 800 MHz).....                                                                                                                                                                                               | 44 |
| Figure S34. HMBC spectrum of madurastatin E1 ( <b>2</b> ) (CD <sub>3</sub> OD, 800 MHz).....                                                                                                                                                                                               | 45 |
| Figure S35. ECD spectrum of madurastatin E1 ( <b>2</b> ) (MeOH).....                                                                                                                                                                                                                       | 46 |
| Figure S36. HR-ESIMS spectrum of madurastatin E1 ( <b>2</b> ).....                                                                                                                                                                                                                         | 47 |
| <b>Figure S37.</b> <sup>1</sup> H NMR spectrum of madurastatin F1 ( <b>3</b> ) (CD <sub>3</sub> OD, 800 MHz).....                                                                                                                                                                          | 48 |
| <b>Figure S38.</b> <sup>1</sup> H- <sup>1</sup> H COSY spectrum of madurastatin F1 ( <b>3</b> ) (CD <sub>3</sub> OD, 800 MHz).....                                                                                                                                                         | 49 |
| <b>Figure S39.</b> HSQC spectrum of madurastatin F1 ( <b>3</b> ) (CD <sub>3</sub> OD, 800 MHz).....                                                                                                                                                                                        | 50 |
| <b>Figure S40.</b> HMBC spectrum of madurastatin F1 ( <b>3</b> ) (CD <sub>3</sub> OD, 800 MHz).....                                                                                                                                                                                        | 51 |
| <b>Figure S41.</b> ECD spectrum of madurastatin F1 ( <b>3</b> ) (MeOH). ....                                                                                                                                                                                                               | 52 |
| <b>Figure S42.</b> HR-ESIMS spectrum of madurastatin F1 ( <b>3</b> ).....                                                                                                                                                                                                                  | 53 |
| <b>Figure S43.</b> <sup>1</sup> H NMR spectrum of madurastatin G1 ( <b>4</b> ) (CD <sub>3</sub> OD, 800 MHz).....                                                                                                                                                                          | 54 |
| <b>Figure S44.</b> <sup>1</sup> H- <sup>1</sup> H COSY spectrum of madurastatin G1 ( <b>4</b> ) (CD <sub>3</sub> OD, 800 MHz).....                                                                                                                                                         | 55 |
| <b>Figure S45.</b> HSQC spectrum of madurastatin G1 ( <b>4</b> ) (CD <sub>3</sub> OD, 800 MHz).....                                                                                                                                                                                        | 56 |
| <b>Figure S46.</b> HMBC spectrum of madurastatin G1 ( <b>4</b> ) (CD <sub>3</sub> OD, 800 MHz).....                                                                                                                                                                                        | 57 |
| <b>Figure S47.</b> HRESI-MS spectrum of madurastatin G1 ( <b>4</b> ).....                                                                                                                                                                                                                  | 58 |
| <b>Figure S48.</b> <sup>1</sup> H NMR spectrum of synthetic salicyl-D-Ser-Ala-βAla-OH ( <b>4a</b> ) (CD <sub>3</sub> OD, 600 MHz, 300 K).....                                                                                                                                              | 59 |
| .....                                                                                                                                                                                                                                                                                      | 60 |
| <b>Figure S49.</b> <sup>13</sup> C NMR spectrum of synthetic salicyl-D-Ser-Ala-βAla-OH ( <b>4a</b> ) (CD <sub>3</sub> OD, 150 MHz, 300 K).....                                                                                                                                             | 60 |
| .....                                                                                                                                                                                                                                                                                      | 61 |
| <b>Figure S50.</b> DEPT135 NMR spectrum of synthetic salicyl-D-Ser-Ala-βAla-OH ( <b>4a</b> ) (CD <sub>3</sub> OD, 150 MHz, 300 K).....                                                                                                                                                     | 61 |
| <b>Figure S51.</b> <sup>1</sup> H- <sup>1</sup> H COSY NMR spectrum of synthetic salicyl-D-Ser-Ala-βAla-OH ( <b>4a</b> ) (CD <sub>3</sub> OD, 600 MHz, 300 K).....                                                                                                                         | 62 |
| <b>Figure S52.</b> HSQC NMR spectrum of synthetic salicyl-D-Ser-Ala-βAla-OH ( <b>4a</b> ) (CD <sub>3</sub> OD, 600 MHz, 300 K).....                                                                                                                                                        | 63 |
| <b>Figure S53.</b> HMBC NMR spectrum of synthetic salicyl-D-Ser-Ala-βAla-OH ( <b>4a</b> ) (CD <sub>3</sub> OD, 600 MHz, 300 K).....                                                                                                                                                        | 64 |
| <b>Figure S54.</b> <sup>1</sup> H NMR spectrum of synthetic salicyl-L-Ser-Ala-βAla-OH ( <b>4b</b> ) (CD <sub>3</sub> OD, 600 MHz, 300 K).....                                                                                                                                              | 65 |
| .....                                                                                                                                                                                                                                                                                      | 66 |
| <b>Figure S55.</b> <sup>13</sup> C NMR spectrum of synthetic salicyl-L-Ser-Ala-βAla-OH ( <b>4b</b> ) (CD <sub>3</sub> OD, 150 MHz, 300 K).....                                                                                                                                             | 66 |
| .....                                                                                                                                                                                                                                                                                      | 67 |
| <b>Figure S56.</b> DEPT135 NMR spectrum of synthetic salicyl-L-Ser-Ala-βAla-OH ( <b>4b</b> ) (CD <sub>3</sub> OD, 150 MHz, 300 K).....                                                                                                                                                     | 67 |
| <b>Figure S57.</b> <sup>1</sup> H- <sup>1</sup> H COSY NMR spectrum of synthetic salicyl-L-Ser-Ala-βAla-OH ( <b>4b</b> ) (CD <sub>3</sub> OD, 600 MHz, 300 K).....                                                                                                                         | 68 |
| <b>Figure S58.</b> HSQC NMR spectrum of synthetic salicyl-L-Ser-Ala-βAla-OH ( <b>4b</b> ) (CD <sub>3</sub> OD, 600 MHz, 300                                                                                                                                                                |    |

|                                                                                                                                                                                                                                                                                                                                                                                                                                                                                                          |     |
|----------------------------------------------------------------------------------------------------------------------------------------------------------------------------------------------------------------------------------------------------------------------------------------------------------------------------------------------------------------------------------------------------------------------------------------------------------------------------------------------------------|-----|
| K).....                                                                                                                                                                                                                                                                                                                                                                                                                                                                                                  | 69  |
| <b>Figure S59.</b> HMBC NMR spectrum of synthetic salicyl-L-Ser-Ala-βAla-OH ( <b>4b</b> ) (CD <sub>3</sub> OD, 600 MHz, 300 K).....                                                                                                                                                                                                                                                                                                                                                                      | 70  |
| Figure S60. ECD spectrum of madurastatin G1 (4a) (MeOH).....                                                                                                                                                                                                                                                                                                                                                                                                                                             | 71  |
| <b>Figure S61.</b> <sup>1</sup> H NMR spectrum of Ga <sup>3+</sup> -madurastatin A1 ( <b>5</b> ) (DMSO- <i>d</i> <sub>6</sub> , 600 MHz, 300 K).....                                                                                                                                                                                                                                                                                                                                                     | 72  |
| <b>Figure S62.</b> <sup>13</sup> C NMR spectrum of Ga <sup>3+</sup> -madurastatin A1 ( <b>5</b> ) (DMSO- <i>d</i> <sub>6</sub> , 150 MHz, 300 K).....                                                                                                                                                                                                                                                                                                                                                    | 73  |
| <b>Figure S63.</b> DEPT135 NMR spectrum of Ga <sup>3+</sup> -madurastatin A1 ( <b>5</b> ) (DMSO- <i>d</i> <sub>6</sub> , 150 MHz, 300 K).....                                                                                                                                                                                                                                                                                                                                                            | 74  |
| <b>Figure S64.</b> <sup>1</sup> H- <sup>1</sup> H COSY NMR spectrum of Ga <sup>3+</sup> -madurastatin A1 ( <b>5</b> ) (DMSO- <i>d</i> <sub>6</sub> , 600 MHz, 300 K)..                                                                                                                                                                                                                                                                                                                                   | 75  |
| <b>Figure S65.</b> HSQC NMR spectrum of Ga <sup>3+</sup> -madurastatin A1 ( <b>5</b> ) (DMSO- <i>d</i> <sub>6</sub> , 600 MHz, 300 K) .....                                                                                                                                                                                                                                                                                                                                                              | 76  |
| Figure S66. HMBC NMR spectrum of Ga-madurastatin A1 ( <b>5</b> ) (DMSO- <i>d</i> <sub>6</sub> , 600 MHz, 300 K).....                                                                                                                                                                                                                                                                                                                                                                                     | 77  |
| <b>Figure S67.</b> LC-HRESI-MS chromatogram of compound <b>5</b> enriched HPLC fraction. A) Total ion chromatogram (TIC); B) Extracted ion chromatogram (EIC) of Ga <sup>3+</sup> complex of <b>5</b> for <i>m/z</i> 672.1891; C) Extract ion chromatogram (EIC) of Fe <sup>3+</sup> complex of <b>5</b> for <i>m/z</i> 659.1984; D) Extracted ion chromatogram (EIC) of apo- <b>5</b> for <i>m/z</i> 606.2866. ....                                                                                     | 78  |
| <b>Figure S68.</b> LC-HRESI-MS spectrum of Ga <sup>3+</sup> complex of <b>5</b> , positive mode.....                                                                                                                                                                                                                                                                                                                                                                                                     | 79  |
| <b>Figure S69.</b> LC-HRESI-MS spectrum of Fe complex of <b>5</b> , positive mode. ....                                                                                                                                                                                                                                                                                                                                                                                                                  | 80  |
| <b>Figure S70.</b> LC-HRESI-MS spectrum of apo form of <b>5</b> , positive mode. ....                                                                                                                                                                                                                                                                                                                                                                                                                    | 81  |
| <b>Figure S71.</b> LC-HRESI-MS/MS spectrum of apo form of <b>5</b> , positive mode. ....                                                                                                                                                                                                                                                                                                                                                                                                                 | 82  |
| Figure S72. Retention times of the L-FDAA derivatized amino acids of standards.....                                                                                                                                                                                                                                                                                                                                                                                                                      | 86  |
| <b>Figure S73.</b> The retention times of the L-FDAA derivatized amino acids from compound <b>1</b> .....                                                                                                                                                                                                                                                                                                                                                                                                | 88  |
| <b>Figure S74.</b> LC-HRESI(+)-MS chromatogram of <b>5</b> from Marfey's reaction. A) Extract ion count (EIC) mode of <b>5</b> under <i>m/z</i> 342.1038; B) EIC of <b>5</b> for <i>m/z</i> 358.0958; C) EIC of <b>5</b> for <i>m/z</i> 385.1461; D) EIC of L-alanine for <i>m/z</i> 342.1038; e) EIC of β-alanine for <i>m/z</i> 342.1038; F) EIC of D-serine for <i>m/z</i> 358.0987; G) EIC of L-ornithine for <i>m/z</i> 385.1461; H) EIC of D-ornithine for <i>m/z</i> 385.1461. ....               | 89  |
| Figure S75. Phylogenetic analysis of Condensation Domains (C-domains of the <i>rene</i> cluster and the <i>mad</i> cluster are marked with a star).C-domains were aligned using ClustalW. The tree was created with fastree 2 (green: heterocyclization domains marked with Cyc; pink: condensation domains for the condensation of a D- and an L-amino acid ( <sup>P</sup> C <sub>L</sub> ), blue: Condensation domains for the condensation of two L-amino acids ( <sup>L</sup> C <sub>L</sub> ). .... | 99  |
| Figure S76. Phylogenetic analysis of Adenylation Domains (A-domains of the <i>rene</i> cluster and the <i>mad</i> cluster are marked with a star). A-domains were aligned using ClustalW. The tree was created with fastree 2 (yellow: A-domains with a specificity of Cys, blue: A-domains for glycine, orange: ornithine and derivatives thereof, red: beta-alanine) .....                                                                                                                             | 100 |

|                                                                                                                                                                                                                   |     |
|-------------------------------------------------------------------------------------------------------------------------------------------------------------------------------------------------------------------|-----|
| Table S1. Medium compositions.....                                                                                                                                                                                | 6   |
| Table S2. Determination of inhibition zones during growth inhibition assay.....                                                                                                                                   | 7   |
| <b>Table S3.</b> Fungus-bacterium co-culture ( <i>Actinomadura</i> sp. RB99 versus <i>Pseudoxylaria</i> sp. X802) grown on PDA agar plates showing inhibition of fungal growth towards the bacterial colony. .... | 8   |
| Table S4. <sup>1</sup> H NMR (800 MHz) data of compounds 1–4 in MeOH- <i>d</i> <sub>4</sub> . <sup>a</sup> .....                                                                                                  | 31  |
| <b>Table S5.</b> <sup>13</sup> C NMR (200 MHz) data of compounds 1–4 in MeOH- <i>d</i> <sub>4</sub> . <sup>a</sup> .....                                                                                          | 32  |
| <b>Table S6.</b> NMR Data (DMSO- <i>d</i> <sub>6</sub> , at 300 K) for madurastatin A1 ( <b>5</b> , Ga <sup>3+</sup> -complex). <sup>a</sup> .....                                                                | 33  |
| <b>Table S7.</b> NMR Data (CD <sub>3</sub> OD, at 300 K) for synthetic salicyl-D-Ser-Ala-βAla-OH ( <b>4a</b> ) and salicyl-L-Ser-Ala-βAla-OH ( <b>4b</b> ) <sup>a,b,c</sup> .....                                 | 34  |
| <b>Table S8.</b> Computationally calculated <sup>1</sup> H and <sup>13</sup> C chemical shifts of <b>2a</b> and <b>2b</b> by utilizing computational analysis. ....                                               | 92  |
| <b>Table S9.</b> Computationally calculated <sup>1</sup> H and <sup>13</sup> C chemical shifts of <b>3a</b> and <b>3b</b> .....                                                                                   | 94  |
| <b>Table S10.</b> Computationally calculated <sup>1</sup> H and <sup>13</sup> C chemical shifts of <b>4a</b> and <b>4b</b> .....                                                                                  | 96  |
| <b>Table S11.</b> Comparison of adenylation domain active side residues extracted by NRPSPredictor 2based on Amino acid sequences from known NRPS's.....                                                          | 98  |
| Table S12. Top BLAST hits of genes in genomic region of putative madurastatin cluster in <i>Actinomadura</i> sp. RB99 .....                                                                                       | 101 |

## 1. General Experimental Procedures

Optical rotations were calculated using a Jasco P-1020 polarimeter (Jasco, Easton, MD, USA). Ultraviolet (UV) spectra were acquired on an Agilent 8453 UV-visible spectrophotometer (Agilent Technologies, Santa Clara, CA). Experimental ECD spectra in MeOH were acquired in a quartz cuvette of 1 mm optical path length on a JASCO J-1500 spectropolarimeter (Tokyo, Japan). NMR spectra, including  $^1\text{H}$ - $^1\text{H}$  COSY, HSQC, HMBC, and ROESY experiments, were carried out using a Varian UNITY INOVA 800 NMR spectrometer operating at 800 MHz ( $^1\text{H}$ ) and 200 MHz ( $^{13}\text{C}$ ), with chemical shifts given in ppm ( $\delta$ ). NMR spectra for **5** were recorded on a Varian UNITY INOVA 600 NMR spectrometer operating at 600 MHz ( $^1\text{H}$ ) and 150 MHz ( $^{13}\text{C}$ ), with chemical shifts given in ppm ( $\delta$ ).

Silica gel 60 (Merck, 230-400 mesh) and RP-C18 silica gel (Merck, 230-400 mesh) were used for column chromatography. Merck precoated silica gel F<sub>254</sub> plates and RP-18 F<sub>254s</sub> plates were used for thin layer chromatography (TLC). Spots were detected on TLC under UV light or by heating after spraying with anisaldehyde-sulfuric acid. Semi-preparative HPLC used a Shimadzu Prominence HPLC System with SPD-20A/20AV Series Prominence HPLC UV-Vis Detectors (Shimadzu, Tokyo, Japan). Preparative high-performance liquid chromatography (HPLC) utilized a Waters 1525 Binary HPLC pump with Waters 996 Photodiode Array Detector (Waters Corporation, Milford, CT, USA).

Low-resolution high-performance liquid chromatography-mass spectrometry (HPLC-MS) analysis was carried out on an Agilent 1200 Series HPLC system (Agilent Technologies, Santa Clara, CA, USA) equipped with a diode array detector and a 6130 Series ESI mass spectrometer by using an analytical Kinetex (4.6 × 100 mm, 3.5  $\mu\text{m}$ ). High-resolution (HR) HPLC-MS and HR-tandem HPLC-MS were carried out on an Agilent 6545 Accurate-Mass quadrupole time-of-flight (QToF)-HPLC-MS, consisting of a 1290 Infinity Series HPLC system, an automated liquid sampler, a diode array detector, a JetStream ESI source, and the 6545 Series QToF by using an Agilent EclipsePlus C18 column (2.1 mm × 50 mm, RRHD 1.8  $\mu\text{m}$ , Agilent Technologies).

UHPLC-HESI-HRMS measurement was performed on a Dionex Ultimate3000 system combined with a Q-Exactive Plus mass spectrometer (Thermo Scientific) with a heated electrospray ion source (HESI). Metabolite separation was carried out by reverse phase liquid chromatography at 40 °C using a Luna Omega C18 column (100 × 2.1 mm, 1.6  $\mu\text{m}$ , 100 Å, Phenomenex) preceded by a SecurityGuard™ ULTRA guard cartridge (2 × 2.1 mm, Phenomenex). Mobile phases were acidified with 0.1% formic acid and consisted of H<sub>2</sub>O (A) and acetonitrile (B).

## 2. Cultivation and extraction of *Actinomadura* sp. RB99

*Actinomadura* sp. RB99 was cultivated in 25 mL liquid cultures in a shaker at 150 rpm and 28 °C for up to eleven days and used as inoculum.

**Table S1.** Medium compositions

| <b>Compound</b>                                                                                                                                | <b>Concentration</b>                                                           |
|------------------------------------------------------------------------------------------------------------------------------------------------|--------------------------------------------------------------------------------|
| <b>ISP2 medium, pH 7.2</b>                                                                                                                     |                                                                                |
| Yeast extract                                                                                                                                  | 4 g/L                                                                          |
| Malt extract                                                                                                                                   | 10 g/L                                                                         |
| Glucose                                                                                                                                        | 4 g/L                                                                          |
| <b>ISP5 medium</b>                                                                                                                             |                                                                                |
| L-Asparagine * 1H <sub>2</sub> O                                                                                                               | 1.14 g/L                                                                       |
| Glycerol                                                                                                                                       | 10 g/L                                                                         |
| KH <sub>2</sub> PO <sub>4</sub>                                                                                                                | 1 g/L                                                                          |
| Trace elements FeSO <sub>4</sub> * 7 H <sub>2</sub> O                                                                                          | (1; 0.5; 0) µg/L for (standard; low Iron; no Iron)                             |
| Trace elements MnCl <sub>2</sub> * 4 H <sub>2</sub> O                                                                                          | 1 µg/L                                                                         |
| Trace elements ZnSO <sub>4</sub> * 7 H <sub>2</sub> O                                                                                          | 1 µg/L                                                                         |
| <b>ISP5 sea salt medium with different iron concentrations, sea salt stock solution was autoclaved separately and added before inoculation</b> |                                                                                |
| L-Asparagine * 1H <sub>2</sub> O                                                                                                               | 1.14 g/L                                                                       |
| Glycerol                                                                                                                                       | 10 g/L                                                                         |
| KH <sub>2</sub> PO <sub>4</sub>                                                                                                                | 1 g/L                                                                          |
| Sea salt solution (10% w/v)                                                                                                                    | 16 ml/L                                                                        |
| Trace elements FeSO <sub>4</sub> * 7 H <sub>2</sub> O                                                                                          | (1 <sub>standard</sub> ; 0.5 <sub>low iron</sub> ; 0 <sub>no iron</sub> ) µg/L |
| Trace elements MnCl <sub>2</sub> * 4 H <sub>2</sub> O                                                                                          | 1 µg/L                                                                         |
| Trace elements ZnSO <sub>4</sub> * 7 H <sub>2</sub> O                                                                                          | 1 µg/L                                                                         |

### 3. Co-Cultivation Studies

**Table S2.** Determination of inhibition zones during growth inhibition assay.

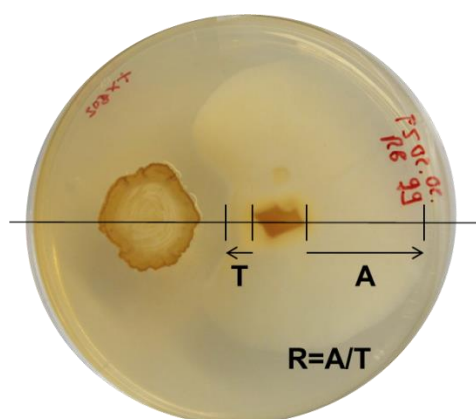

| Strains                  | 9 days |        |       | 12 days |        |       | 14 days |        |       |
|--------------------------|--------|--------|-------|---------|--------|-------|---------|--------|-------|
|                          | T      | A      | R=A/T | T       | A      | R=A/T | T       | A      | R=A/T |
| <b>RB99 X187</b>         | 150.50 | 330.00 | 2.19  | 177.60  | 536.40 | 3.02  | 126.00  | 483.00 | 3.83  |
| <b>RB99 X187#2</b>       | 164.80 | 348.00 | 2.11  | 246.50  | 525.20 | 2.13  | 260.00  | 512.10 | 1.97  |
| <b>RB99 X187#3</b>       | 194.00 | 280.00 | 1.44  | 282.00  | 480.80 | 1.70  | 268.80  | 511.30 | 1.90  |
| <b>RB99 X802</b>         | 177.00 | 471.00 | 2.66  | 192.00  | 858.10 | 4.47  | 153.00  | 807.10 | 5.28  |
| <b>RB99 X802#2</b>       | 180.20 | 585.00 | 3.25  | 182.50  | 836.50 | 4.58  | 146.30  | 858.10 | 5.87  |
| <b>RB99 X802#3</b>       | 385.20 | 621.10 | 1.61  | 387.10  | 867.00 | 2.24  | 336.10  | 878.20 | 2.61  |
| <b>X187</b><br>[control] | 433.00 | 435.00 | 1.00  | 517.00  | 523.30 | 1.01  | 681.50  | 683.70 | 1.00  |
| <b>X802</b><br>[control] | 401.60 | 415.90 | 1.04  | 575.20  | 538.60 | 0.94  | 687.00  | 666.00 | 0.97  |



**Table S3.** Fungus-bacterium co-culture (*Actinomadura* sp. RB99 versus *Pseudoxylaria* sp. X802) grown on PDA agar plates showing inhibition of fungal growth towards the bacterial colony.

| Days | <i>Actinomadura</i> sp. RB99 versus <i>Pseudoxylaria</i> sp. X802                   |  | <i>Actinomadura</i> sp. RB99 versus <i>Pseudoxylaria</i> sp. X187                    |  |
|------|-------------------------------------------------------------------------------------|--|--------------------------------------------------------------------------------------|--|
| 0    |    |  |    |  |
| 2    |   |  |   |  |
| 5    |  |  |  |  |
| 7    |  |  |  |  |
| 9    |  |  |  |  |

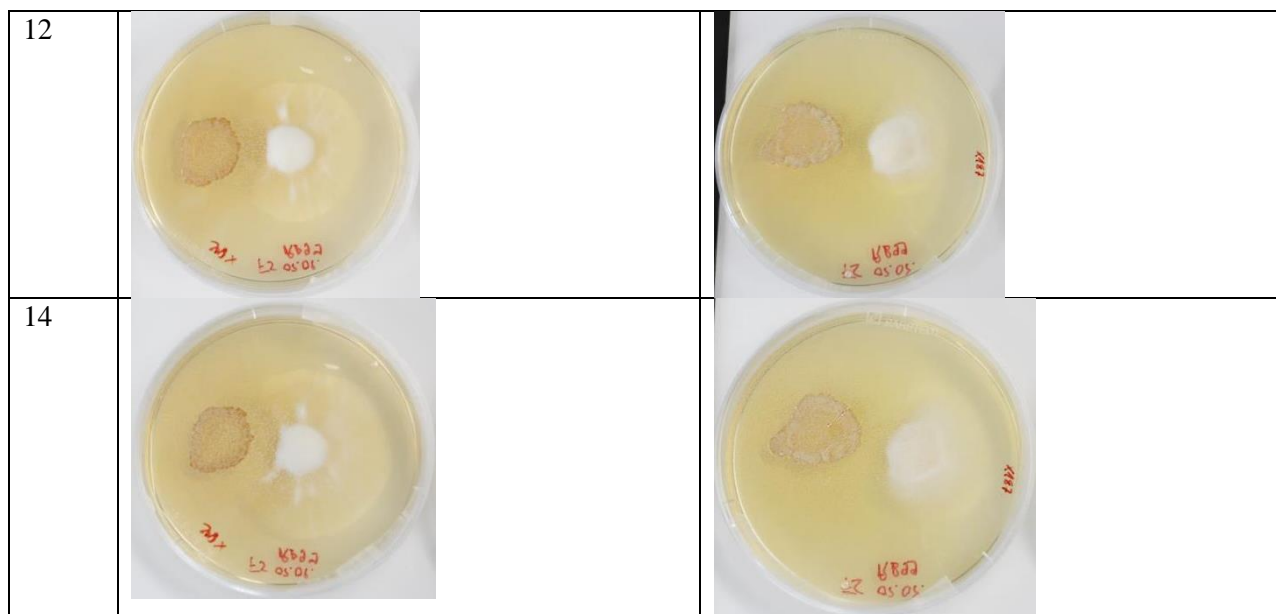

**Table S3-1.** Fungus-bacterium co-culture (*Actinomadura* sp. RB99 versus *Termitomyces* sp. T153) grown on PDA agar plates showing inhibition of fungal growth towards the bacterial colony.

| Days | <i>Actinomadura</i> sp. RB99 versus <i>Termitomyces</i> sp. T153 (top or bottom view) | Days | <i>Actinomadura</i> sp. RB99 versus <i>Termitomyces</i> sp. T153 (top or bottom view) |
|------|---------------------------------------------------------------------------------------|------|---------------------------------------------------------------------------------------|
| 0    |    | 9    |   |
| 7    |    | 13   |   |

#### 4. CAS Activity test

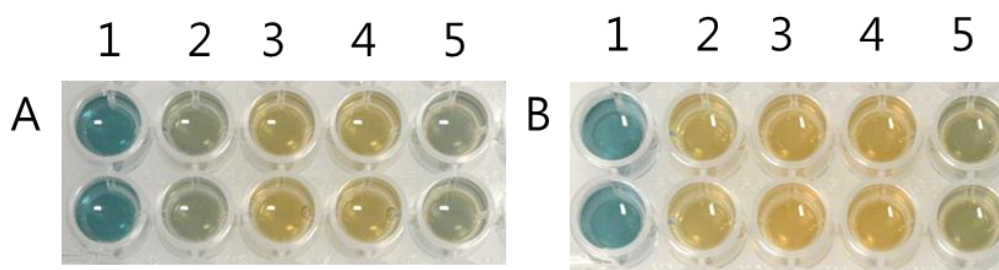

**Figure S1.** Exemplary CAS siderophore assay of bacterial extracts (1 mg/mL). Measurement of duplicates of: (1) MeOH (negative control), (2) 1 mM EDTA (positive control), (3-5) extracts derived from cultures grown on (3) ISP5 sea salt, (4) ISP5 sea salt with low Fe-content, and (5) ISP5 sea salt depleted of Fe. A) after 45 min and B) after 90 min. Orange color indicates iron binding activity. Screening was performed in duplicates,  $n=2$ .

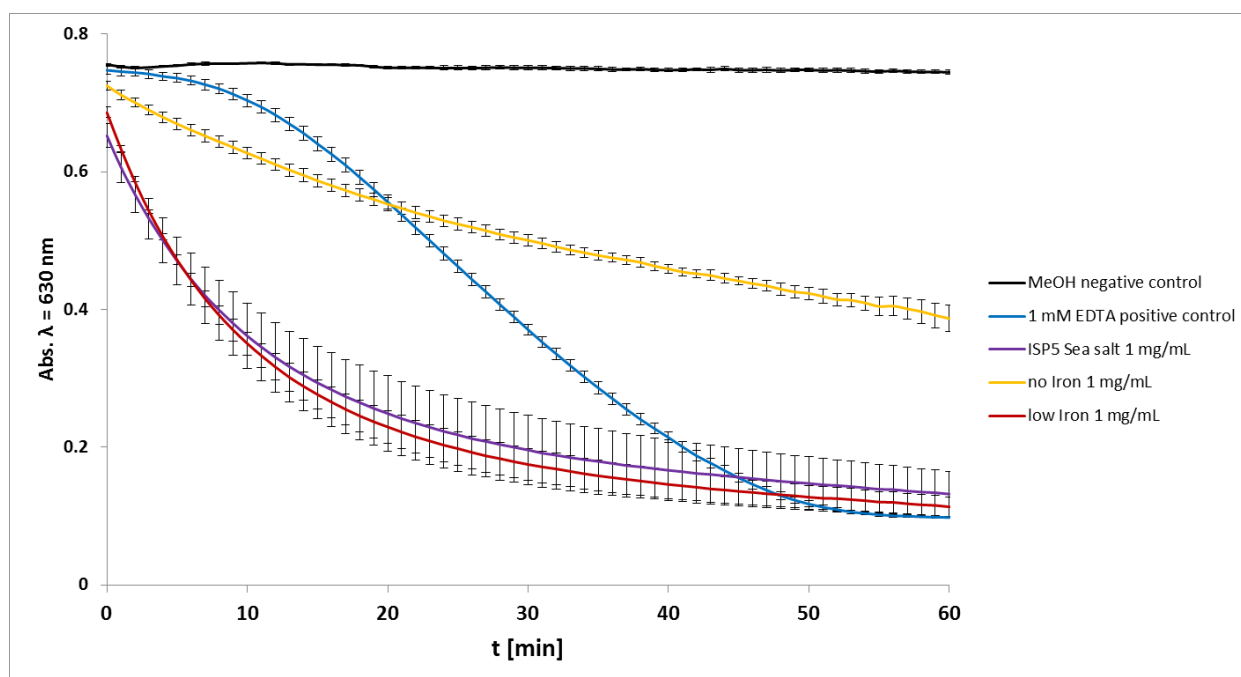

**Figure S2.** CAS siderophore assay of methanolic extracts obtained from bacterial cultures grown under different iron conditions. MeOH was used as negative control and 1 mM EDTA was used as positive control. Error bars indicate  $\pm 0.5$  standard deviation,  $n=2$ .

## 5. Analytical procedures

**General extraction procedure:** C<sub>18</sub>-ec SPE cartridges (6 mL, 1 g, Macherey-Nagel) were washed and prepared for extraction according to the manufacturer's manual. Cartridges were equilibrated with 5 % MeOH in ddH<sub>2</sub>O. Cell free culture supernatant (20 mL, 5 % MeOH) was loaded onto the cartridge. The samples were washed with one column volume 10% MeOH followed by one column volume 20 % MeOH. Subsequently, analytes of interest were eluted with 10 mL 50 % MeOH followed by 10 mL 100 % MeOH. Eluates were combined in weighed glass vials and dried *in vacuo*. Residues were weighed and resuspended in MeOH (1 mg/mL) using ultra-sonication. Concentrated samples were stored in the dark at -20 °C for up to one week. Analytic sub-samples were cleaned from particles *via* centrifugation for 15 min, 13.000 rpm, diluted to a final concentration of 75 µg/mL with MeOH and submitted to UPLC-HRMS based analysis.

### MS<sup>2</sup> and GNPS-based discovery of madurastatin congeners

A molecular network was created using the online workflow (<https://ccms-ucsd.github.io/GNPSDocumentation>) on the GNPS website (<http://gnps.ucsd.edu>). The data was filtered by removing all MS/MS fragment ions within +/- 17 Da of the precursor m/z. MS/MS spectra were window filtered by choosing only the top 6 fragment ions in the +/- 50Da window throughout the spectrum. The precursor ion mass tolerance was set to 0.02 Da and a MS/MS fragment ion tolerance of 0.02 Da. A network was then created where edges were filtered to have a cosine score above 0.7 and more than 6 matched peaks. Further, edges between two nodes were kept in the network if and only if each of the nodes appeared in each other's respective top 10 most similar nodes. Finally, the maximum size of a molecular family was set to 100, and the lowest scoring edges were removed from molecular families until the molecular family size was below this threshold. The spectra in the network were then searched against GNPS' spectral libraries. The library spectra were filtered in the same manner as the input data. All matches kept between network spectra and library spectra were required to have a score above 0.7 and at least 6 matched peaks.

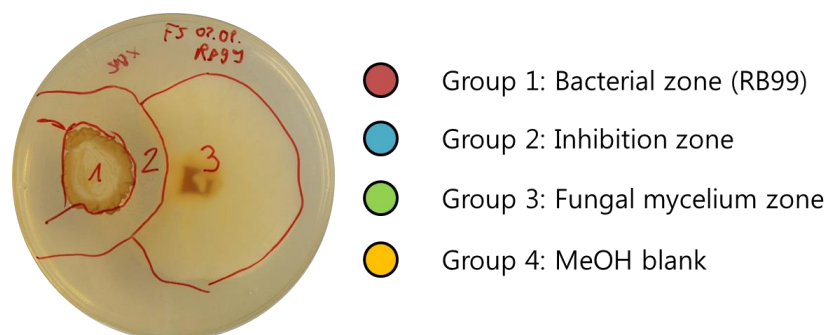

**Figure S3.** Exemplary co-culture analysis and section of zones used for metabolite extraction and analysis.

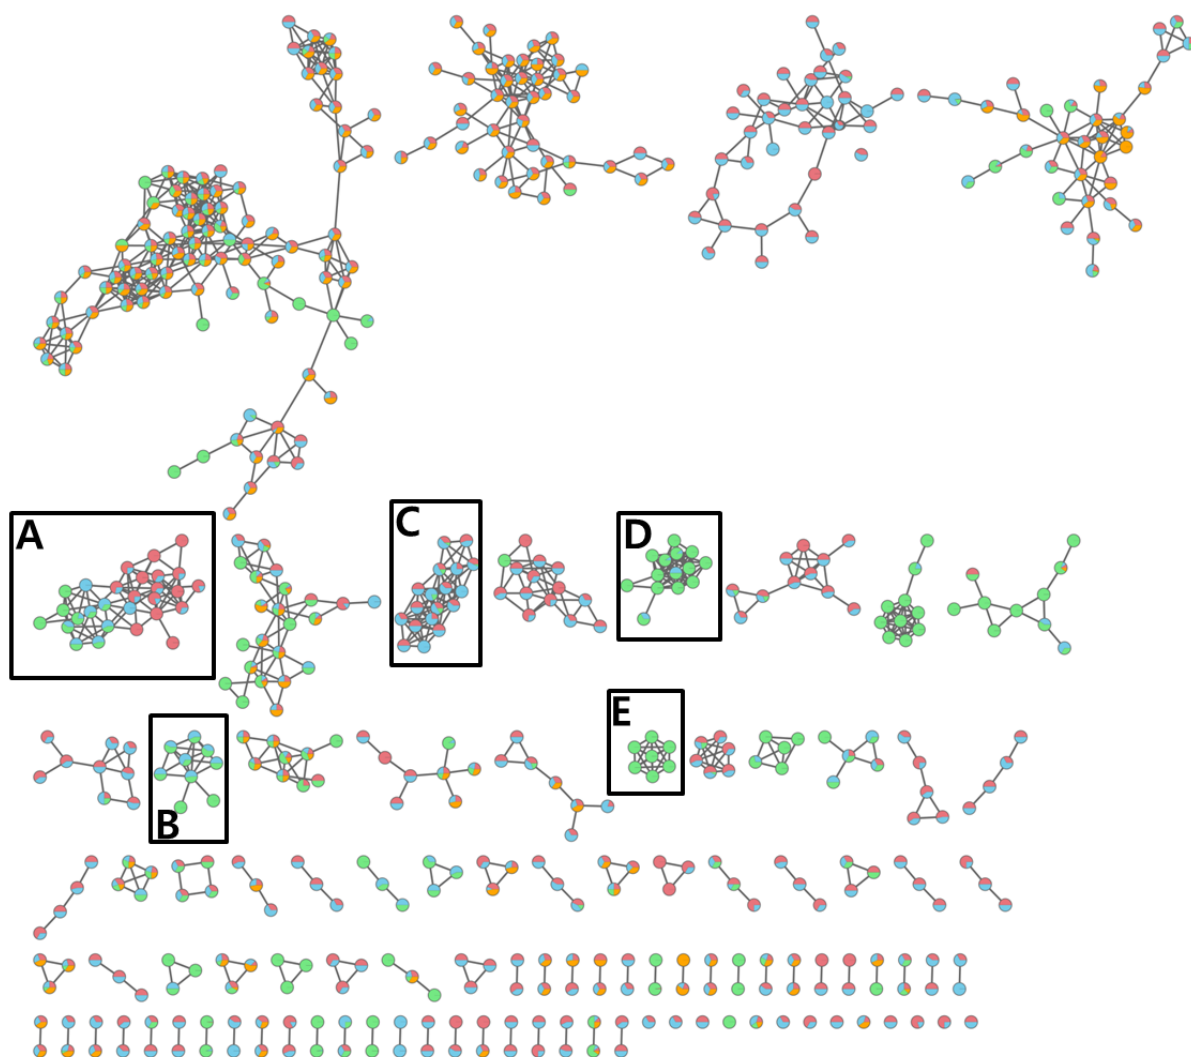

**Figure S4.** Exemplary analysis of co-culture sample (*Actinomadura* sp. RB99 versus *Pseudoxylaria* sp. X802) using network cluster analysis via GNPS platform and visualized by Cytoscape (red: bacterial zone, blue inhibition zone, green: fungal mycelium, yellow: methanol blank, see **Figure S3**). Dereplicated GNPS clusters: A) phosphoethanolamines, B) phosphocholines, C) oligosaccharides, D) pseudoxylallemycins, and E) cytochalasins.



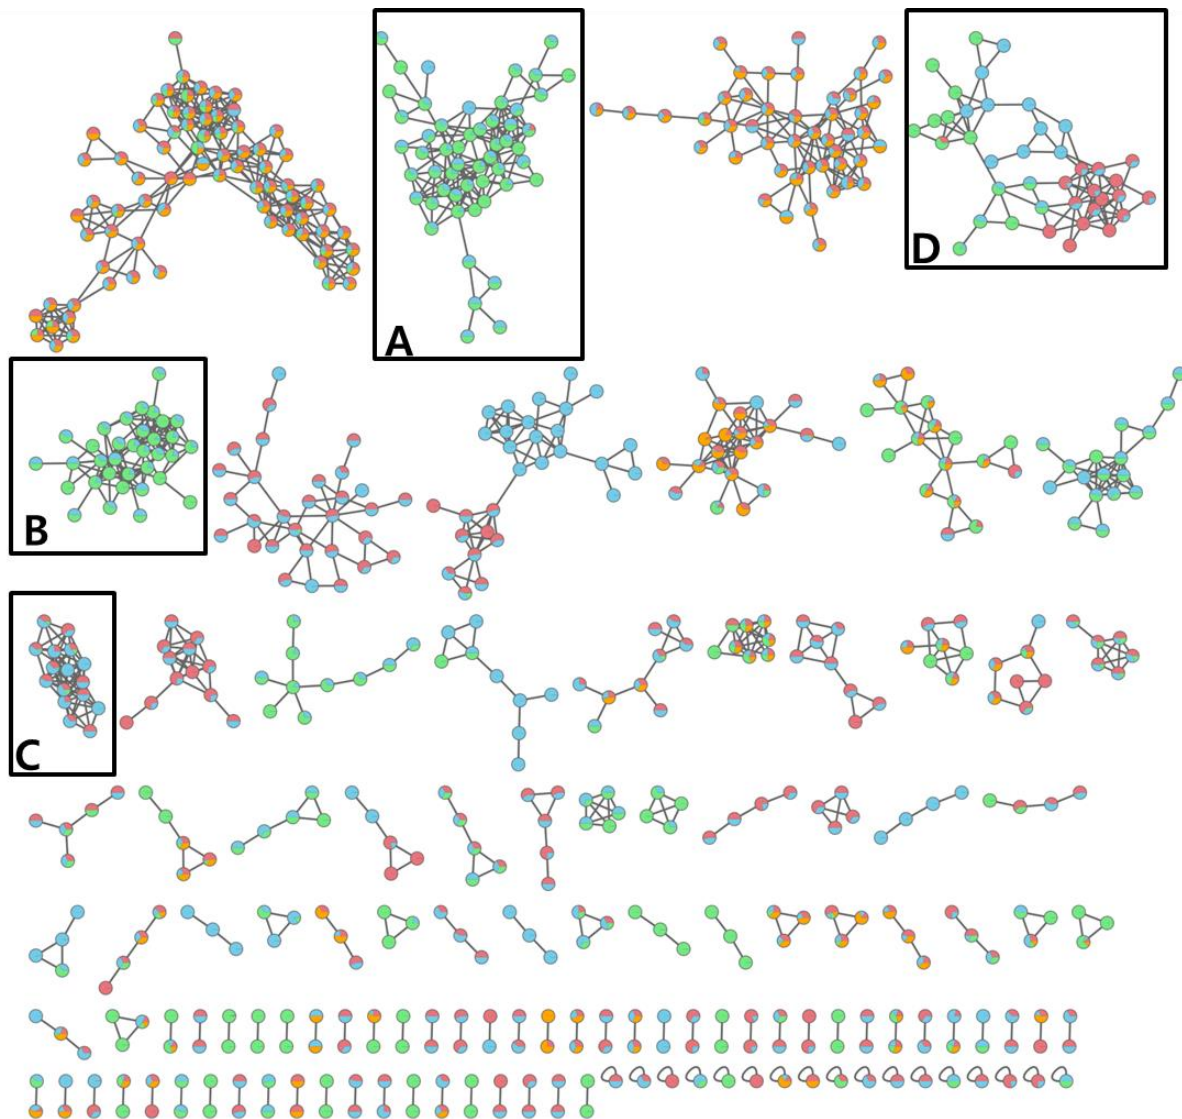

**Figure S5.** Exemplary analysis of co-culture sample (*Actinomadura* sp. RB99 versus *Pseudoxylaria* sp. 187) using network cluster analysis via GNPS platform and visualized using Cytoscape (red: bacterial zone, blue inhibition zone, green: fungal mycelium, yellow: methanol blank, see Figure S3). Dereplicated GNPS clusters: A) xylacremolide, B) pseudoxyllaramide, C) oligosaccharides, D) phospholipids (phosphoethanolamines).

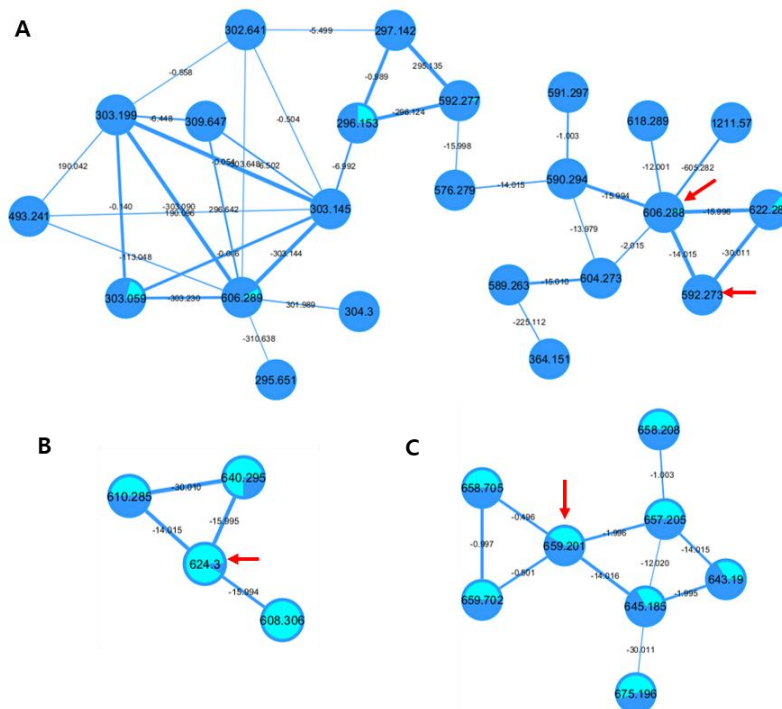

**Figure S6.** GNPS cluster from SPE fraction eluted by 40% MeOH and 60% MeOH. Cyan nodes represent the 40% MeOH fraction, and blue nodes represent the 60% MeOH fraction. A) ‘oxazoline’ containing subcluster ( $m/z$  606.288: madurastatin A1;  $m/z$  592.277: madurastatin C1); B) ‘serine’ containing subcluster ( $m/z$  624.3: madurastatin A2); C) Fe-adducts of ‘oxazoline’ containing subcluster:  $m/z$  659.201: Fe-madurastatin A1)

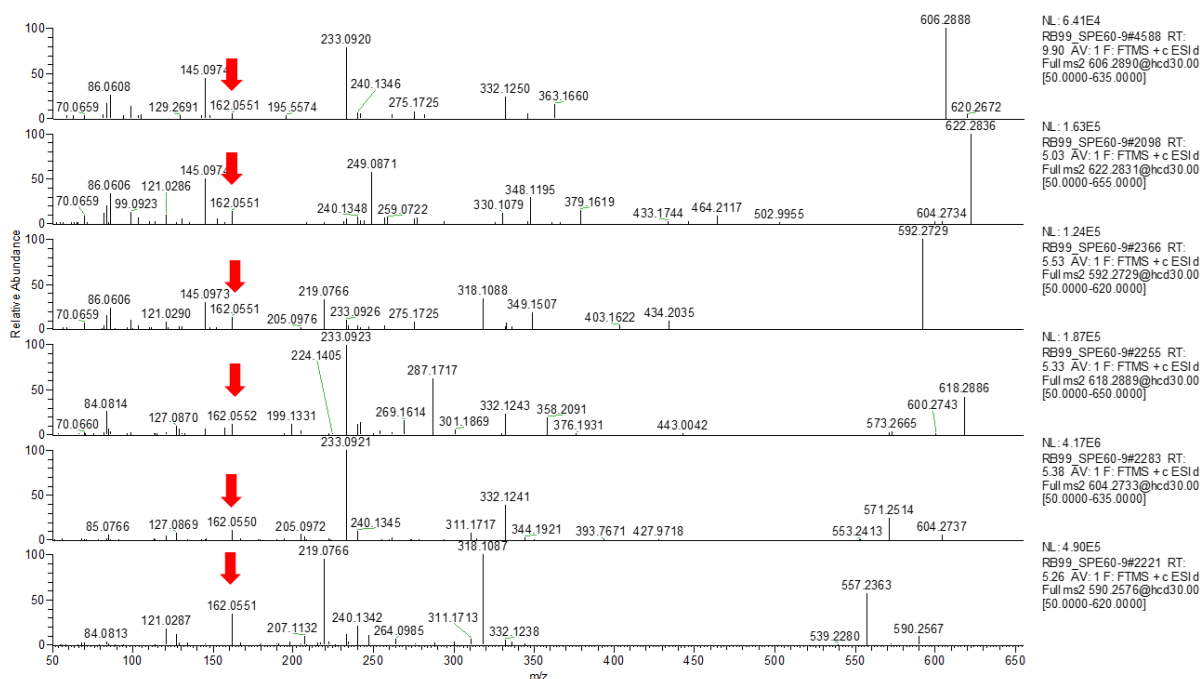

**Figure S7.** LCMS/MS spectra of oxazoline containing derivatives. Red arrow highlights the diagnostic fragment ion at  $m/z$  162.0551.

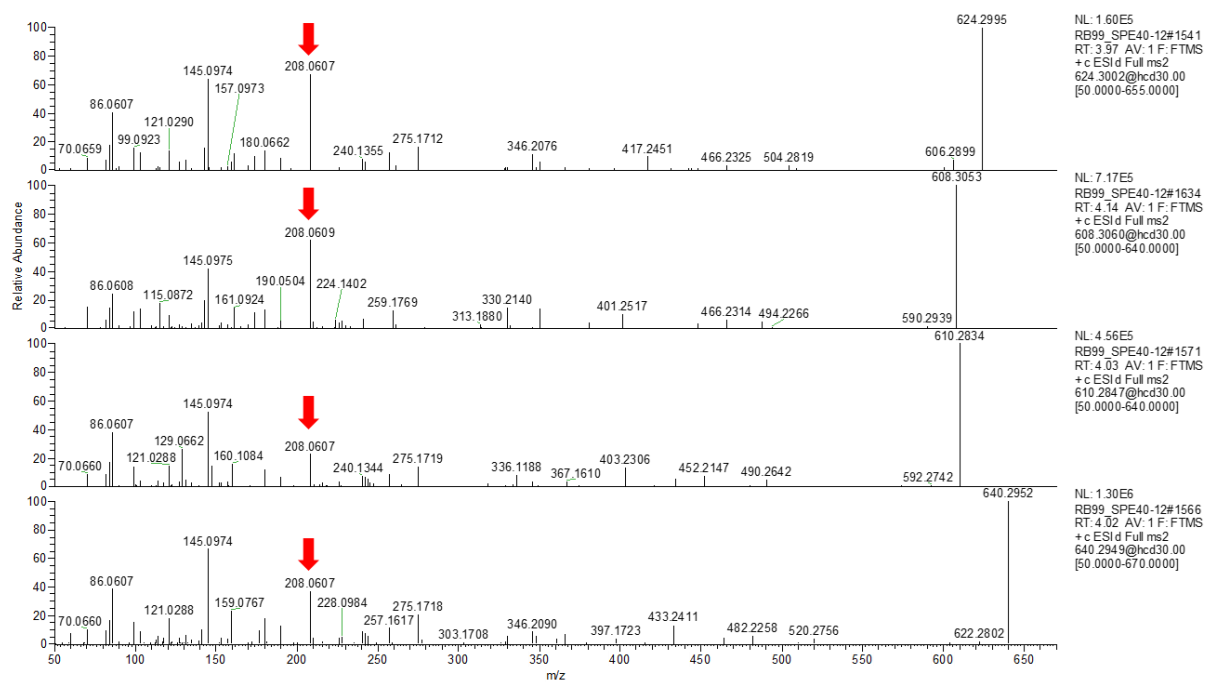

**Figure S8.** LCMS/MS spectra of serine containing derivatives. Red arrow highlights the diagnostic fragment ion at  $m/z$  208.0607.

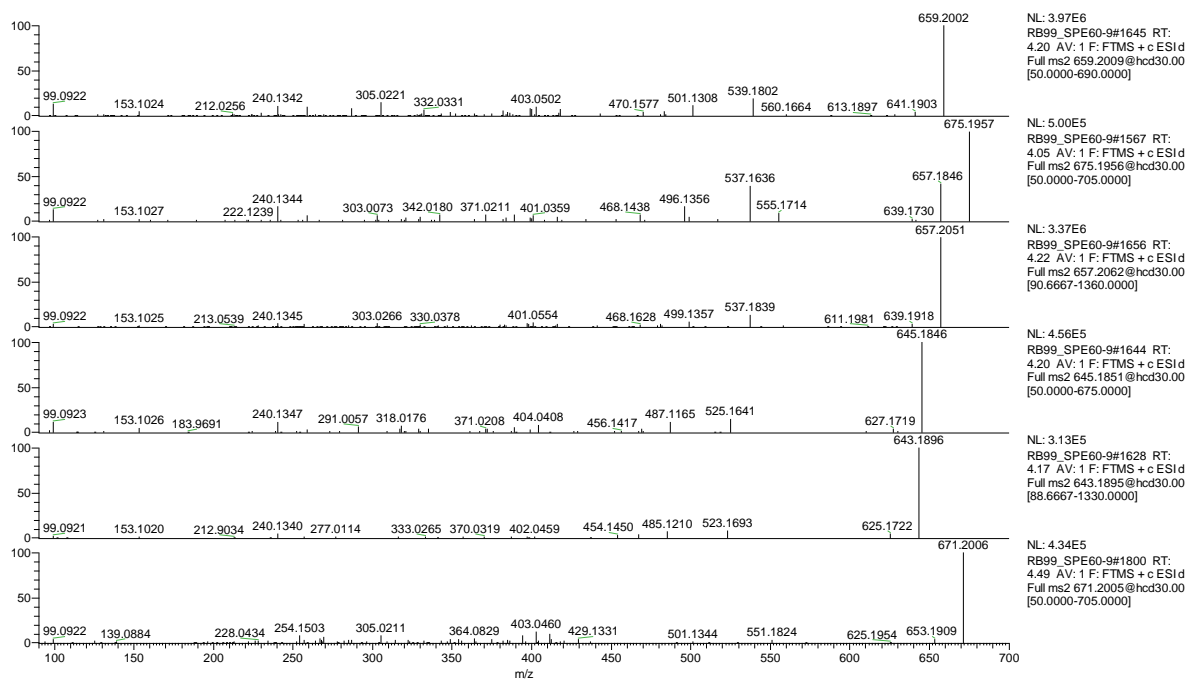

**Figure S9.** LCMS/MS spectra of Fe adduct of oxazoline containing derivatives.



## 6. Time-resolved analysis of siderophore production in different media

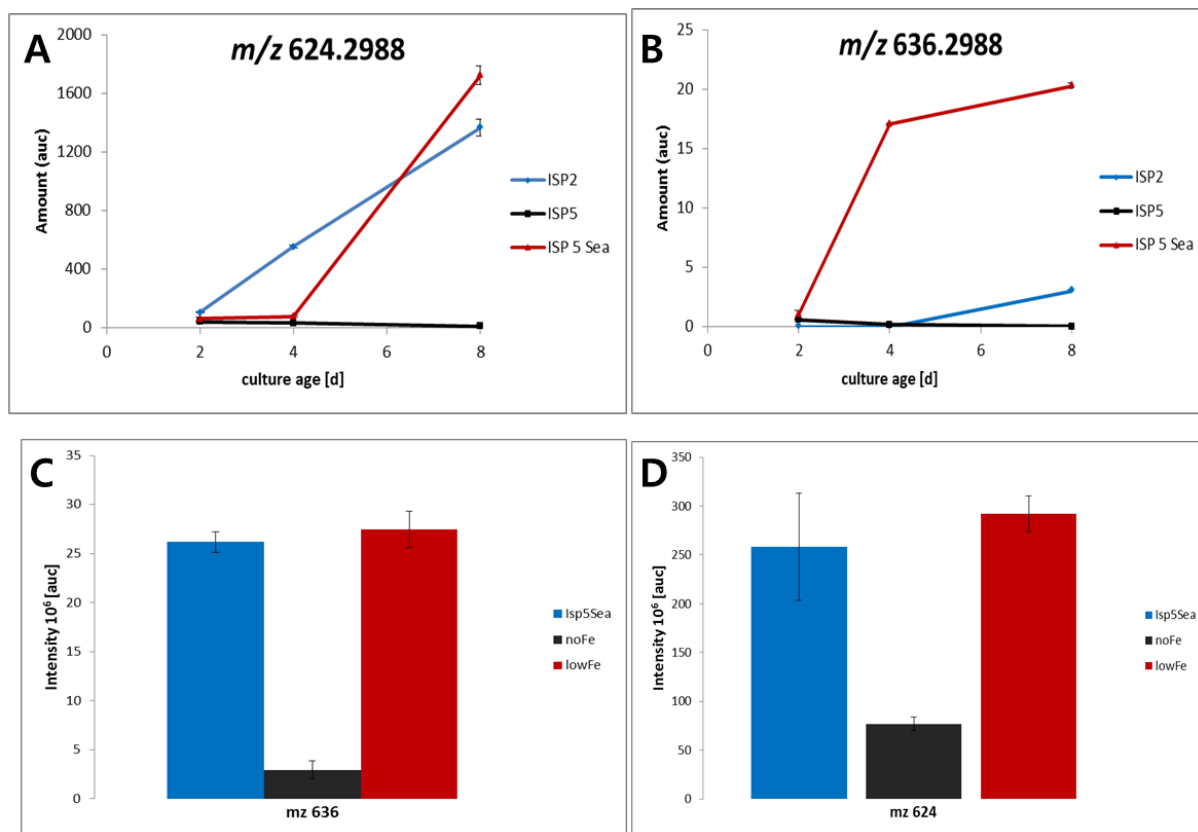

**Figure S10.** Quantification of siderophore production by *Actinomadura* sp. RB99 A) 1  $m/z$   $[M+H]^+$  624.2988, and B) 2  $m/z$   $[M+H]^+$  636.2988 after two, four and eight days of cultivation in different media. Intensity units at  $10^6$  auc. Error bars indicate  $\pm 0.5$  standard deviation, duplicates  $n=2$ . C-D) Determination of production tiers for  $m/z$   $[M+H]^+$  624.2988 and  $m/z$   $[M+H]^+$  636.2988 after eight days when cultivated in media containing different iron concentrations. Error bars indicate  $\pm 0.5$  standard deviation, triplicates  $n=3$ .

## 7. Extraction and Isolation of Compounds

*Actinomadura* sp. RB99 was grown in 50 mL ISP-2 broth for seven days at 30°C (pre-culture) and used to inoculate 100 ISP-2 agar plates. Plates were incubated for 10 days at 30°C, cut into small pieces, consolidated, and immersed overnight in MeOH. The MeOH phase was filtered and evaporated *in vacuo*. The resultant MeOH extract (11 g) was dissolved in distilled water (700 mL) and then solvent-partitioned with EtOAc (700 mL) three times, providing 4.5 g of residue. The EtOAc-soluble fraction (4.5 g) was loaded onto a silica gel column for open column chromatography and fractionated with a gradient solvent system of CH<sub>2</sub>Cl<sub>2</sub>-MeOH (50:1 to 0:1, v/v) to afford seven fractions (A-G). Fraction E (110 mg) was subjected to preparative reversed-phase HPLC (Phenomenex Luna C18, 250 × 21.2 mm i.d., 5 μm) using MeOH-H<sub>2</sub>O (1:9–1:0, v/v, gradient system, flow rate: 5 mL/min) to give four subfractions (E1-E4). Compound **4** (2.0 mg,  $t_R = 29.0$  min) was purified from subfraction E3 (20 mg) by semi-preparative reversed-phase HPLC eluting 28% MeOH/H<sub>2</sub>O (isocratic system, flow rate: 2 mL/min). Fraction F (490 mg) was separated by using preparative reversed-phase HPLC (Phenomenex Luna C18, 250 × 21.2 mm i.d., 5 μm) using CH<sub>3</sub>CN-H<sub>2</sub>O (0.5:9.5–1:0, v/v, gradient system, flow rate: 5 mL/min) to give four subfractions (F1-F4). Subfraction F3 (50 mg) was isolated by semi-preparative reversed-phase HPLC eluting 30% MeOH/H<sub>2</sub>O (isocratic system, flow rate: 2 mL/min), affording compounds **2** (2.3 mg,  $t_R = 50.0$  min) and **3** (1.4 mg,  $t_R = 55.0$  min). Five subfractions (G1-G5) were acquired from fraction G (300 mg) using preparative reversed-phase HPLC (Phenomenex Luna C18, 250 × 21.2 mm i.d., 5 μm) using CH<sub>3</sub>CN-H<sub>2</sub>O (1:9–1:0, v/v, gradient system, flow rate: 5 mL/min). Compound **1** (4.3 mg,  $t_R = 15.0$  min) was isolated from subfraction G2 (45 mg) by semi-preparative reversed-phase HPLC eluting 19% MeOH/H<sub>2</sub>O (isocratic system, flow rate: 2 mL/min).

### For isolation of Fe-siderophore complex of **5**

The resultant MeOH extract was dissolved in 10% MeOH/90% H<sub>2</sub>O and loaded on a conditioned SPE-C18 cartridge (5 g/45 mL), and then fractionated by step-gradient of MeOH and H<sub>2</sub>O mixture (20 mL/fraction). The resultant fractions were concentrated under reduced pressure and submitted to LCMS analysis. The fraction eluted at 40% MeOH contained the apo-siderophore (**1**) with the  $m/z$  at 624.2977 [M+H]<sup>+</sup> as well as a Fe-siderophore complex with an  $m/z$  of 659.1983 [M+H]<sup>+</sup>. Then, the 40% MeOH fraction was subjected to Sephadex LH20 purification and metabolites eluted using 50% MeOH. MS-guided analysis indicated that the Fe-siderophore complex was enriched in Fr. 12. This fraction was titrated with a 100 mM Ga(NO<sub>3</sub>)<sub>3</sub> aq. solution to exchange Fe<sup>3+</sup> with Ga<sup>3+</sup> yielding a siderophore complex with an  $m/z$  of 672.1894 [M+H]<sup>+</sup>. The complex was separated by semipreparative HPLC (Phenomenex Synergi-HydroRP, 250 × 10 mm i.d., 5 μm) using CH<sub>3</sub>CN/0.1% FA gradient (0-5 min, 10% CH<sub>3</sub>CN/90% H<sub>2</sub>O (0.1% FA); 5-40 min, 10% CH<sub>3</sub>CN/90% H<sub>2</sub>O (0.1% FA)-28% CH<sub>3</sub>CN/72% H<sub>2</sub>O (0.1% FA), flow rate at 2 mL/min), affording compound **5** (1.0 mg;  $t_R = 20.0$  min).

## 8. Structure Elucidation of Isolated Compounds

### Structure elucidation of **1**

Compound **1** was obtained as an amorphous powder and its molecular formula was determined to be  $C_{27}H_{41}N_7O_{10}$  on the basis of the positive-ion mode HR-ESIMS data, which exhibited a protonated ion peak at  $m/z$  624.3022  $[M+H]^+$  (Calcd. for  $C_{27}H_{42}N_7O_{10}^+$ , 624.2993). The  $^1H$  NMR data (Table S4) of **1** showed two methyls [ $\delta_H$  1.38 (3H, d,  $J = 7.0$  Hz, H-12) and 2.55 (3H, s, H-1')], nine methylenes [ $\delta_H$  1.75 (2H, m, H-18), 1.77 (2H, m, H-19), 1.84 (1H, m, H-24a), 1.98 (1H, m, H-25a), 2.03 (1H, m, H-25b), 2.07 (1H, m, H-24b), 2.54 (2H, m, H-15), 3.43 (1H, m, H-14a), 3.49 (1H, m, H-14b), 3.59 (1H, m, H-26a), 3.61 (2H, m, H-17), 3.64 (1H, m, H-26b), 3.90 (1H, dd,  $J = 11.0, 4.5$  Hz, H-9a), and 3.95 (1H, dd,  $J = 11.0, 5.0$  Hz, H-9b)], four methines [ $\delta_H$  3.56 (1H, m, H-20), 4.32 (1H, q,  $J = 7.0$  Hz, H-11), 4.50 (1H, m, H-23), and 4.59 (1H, dd,  $J = 5.0, 4.5$  Hz, H-8)], and four aromatic protons [ $\delta_H$  6.92 (1H, t,  $J = 7.5$  Hz, H-2), 6.93 (1H, dd,  $J = 7.5, 1.0$  Hz, H-4), 7.39 (1H, t,  $J = 7.5$  Hz, H-3), and 7.91 (1H, dd,  $J = 7.5, 1.0$  Hz, H-1)]. The  $^{13}C$  NMR spectrum displayed a total of 27 carbon signals, including two methyls ( $\delta_C$  17.4 and 32.6), nine methylenes ( $\delta_C$  21.4, 22.6, 28.1, 28.9, 36.1, 32.6, 47.7, 52.2, and 62.5), four methines ( $\delta_C$  50.5, 51.2, 57.1, and 62.8), four aromatic carbons ( $\delta_C$  117.8, 120.1, 130.1, and 134.6), two non-protonated aromatic carbons ( $\delta_C$  110.9 and 160.1), and six carbonyl carbons ( $\delta_C$  165.5, 170.1, 172.7, 173.9, 174.1, and 174.7). 1D and 2D NMR ( $^1H$ - $^1H$  COSY, HSQC, and HMBC data) analysis of **1** revealed five amino acid spin systems, namely, serine,  $\alpha$ -alanine,  $\beta$ -alanine, and two modified ornithines, along with salicylic acid unit, coupling structure of which was same to madurastatin A2, identified from the culture broth of a pathogenic *Actinomadura madurae* IFM 0745 strain.<sup>1</sup> HRESI-MS/MS<sup>2</sup> analysis of **1** showed distinctive fragment ions at  $m/z$  121.0286, 131.0817, 161.0921, 208.0604, 275.1712, 346.2085, 350.1350, 417.2457 and 504.2777 due to the sequential cleavage of amide bonds of a linear peptide. The structure was also confirmed by the comparison of the experimental HRESI-MS/MS spectrum of **1** with its predicted HRESI-MS/MS spectrum obtained from Competitive Fragmentation Modeling-ID (CFM-ID) 3.0. The detected fragment ions in the experimental HRESI-MS/MS spectrum of **1** matched to corresponding ions in the predicted HRESI-MS/MS spectrum from CFM-ID 3.0. To verify the absolute configurations of **1**, acidic hydrolysis followed by advanced Marfey's method was employed. The acid hydrolysates of **1** and standard amino acids (L/D-Ala, Ser, and Orn, and *N*-methyl-L-Orn) were derivatized with 1-fluoro-2,4-dinitrophenyl-5-L-alanineamide (L-FDAA), and the resultants were analyzed by LC/MS, which showed that the absolute configurations of Ala, Orn, and *N*-methyl-Orn moieties are L-forms while Ser has the absolute configuration of D-form.

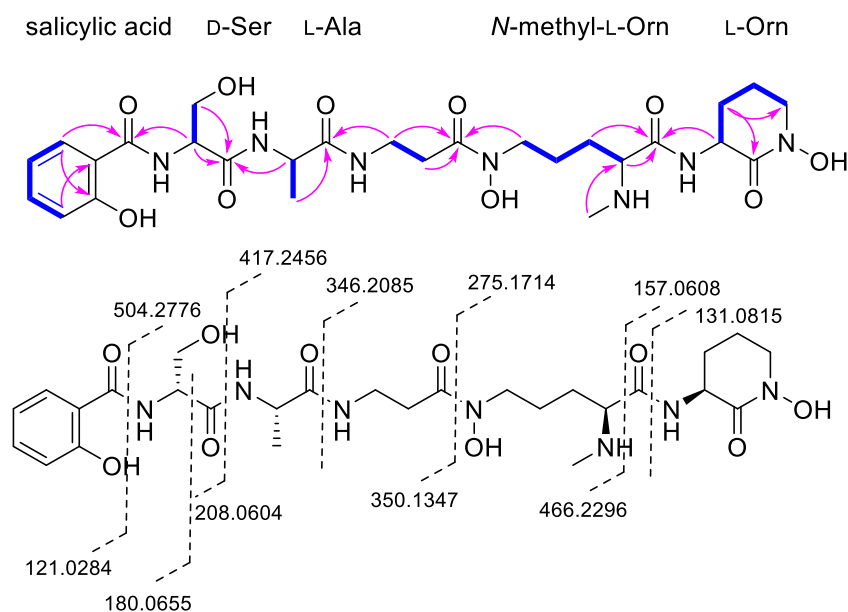

**Figure S11.** Chemical structures of **1** and 2D NMR data and MS/MS fragment ions of **1**. The dashed lines show the fragments obtained in a tandem MS experiment. Blue bonds indicate  $^1\text{H}$ - $^1\text{H}$  COSY correlations and pink arrows indicated HMBC correlations. The depicted numbers indicate the corresponding  $m/z$  values.

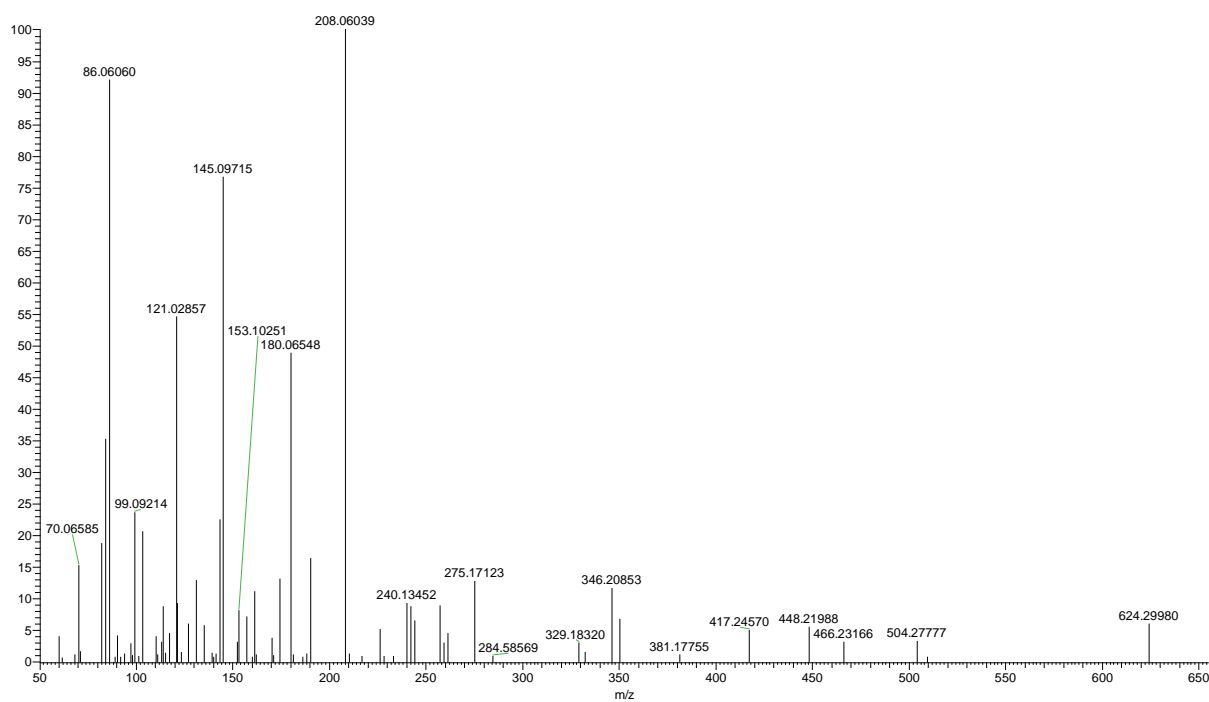

**Figure S12.** MS<sup>2</sup> spectrum of **1** at  $m/z$  624.2998  $[\text{M}+\text{H}]^+$  ( $\text{C}_{27}\text{H}_{42}\text{N}_7\text{O}_{10}^+$ , calcd. 624.2993).

### Structure elucidation of Ga-Complex of **5**

The molecular formula of **5** was deduced from HRESI-MS analysis with the observation of pseudomolecular ion peak at  $m/z$  672.1891  $[M+H]^+$  (Calcd. for  $C_{27}H_{37}N_7O_9Ga$ , 672.1909), and isotope distribution of Ga ( $^{69}Ga$ : $^{71}Ga$  5:3). LC-HRMS analysis showed very closed minor peaks at  $m/z$  659.1984  $[M+H]^+$  (Calcd. for  $C_{27}H_{37}N_7O_9Fe$ , 659.1997), with the isotope distribution of Fe ( $^{54}Fe$ : $^{56}Fe$  6:100). This led to the prediction of apo-siderophore of compound **5** with the molecular formula of  $C_{27}H_{36}N_7O_9$ . Detailed analysis of HPLC fraction containing major compound **5** allowed to detect trace amount of apo-siderophore of **5** at  $m/z$  606.2866  $[M+H]^+$  (Calcd. for  $C_{27}H_{40}N_7O_9^+$ , 606.2882). Detailed analysis of HRMS/MS of apo-siderophore at showed high similarity with compound **1**. The major difference between compound **5** and compound **1** was the absence of fragment ions at  $m/z$  180.0655 and 208.0604 from **1** and the presence of fragment ions at  $m/z$  162.0551, 233.0921, 261.0871 and 332.1241 from **5**. This led to the hypothesis that apo-siderophore **5** was present as oxazoline form, by losing water molecule from the serine moiety of compound **1**.  $^1H$  NMR spectrum indicated the two sets of proton signals, represent the major Ga adduct and minor Fe adduct. Overall, the  $^1H$  NMR spectrum exhibited very similar signals with compound **1**, and the presence of cyclic oxazoline was proved by the observation of HMBC correlation of  $H_2-9$  ( $\delta_H$  4.69 and 4.43) to C-7 ( $\delta_C$  170.46).

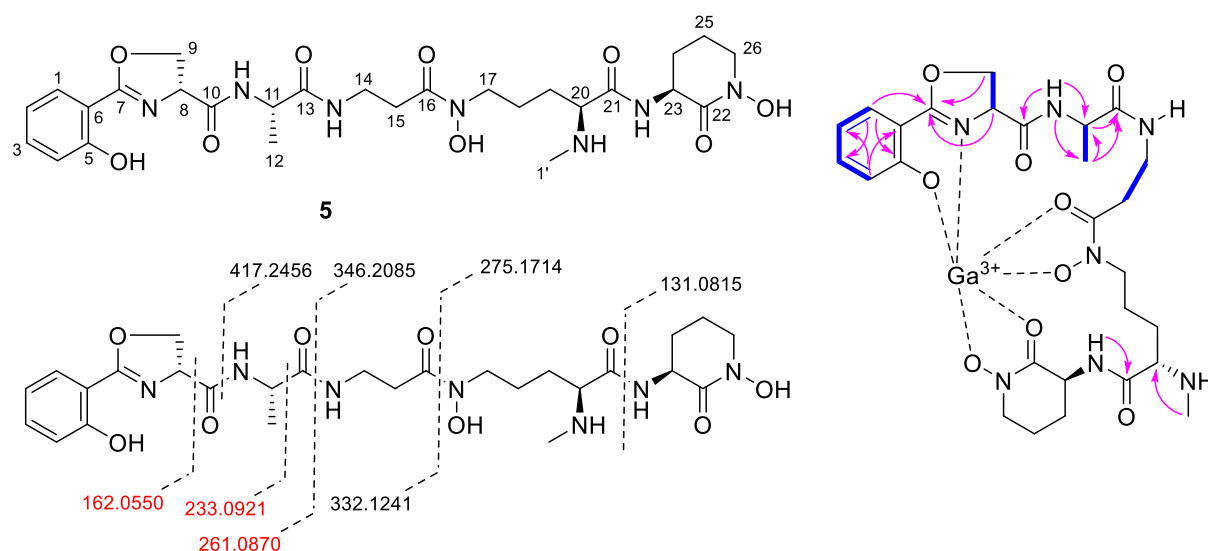

**Figure S13.** Chemical structure of madurastatin A1 (**5**) and 2D NMR data of **5** (Ga complex) and MS/MS fragment ions of **5** (apo form). Blue bonds indicate  $^1H$ - $^1H$  COSY correlations and pink arrows indicated HMBC correlations.

## Structure elucidation of **2**

Compound **2** was isolated as an amorphous powder and its molecular formula of  $C_{28}H_{41}N_7O_{10}$  was suggested by the positive-ion mode HRESI-MS data at  $m/z$  636.3017  $[M+H]^+$  (Calcd. for  $C_{28}H_{42}N_7O_{10}^+$ , 636.2993). Detailed analysis of 1D and 2D NMR spectra revealed that spectroscopic values of **2** were almost identical of those of **1**, except for the presence of an additional methylene [ $\delta_H$  3.77 (1H, d,  $J = 4.0$  Hz, H-2'a) and 4.34 (1H, d,  $J = 4.0$  Hz, H-2'b);  $\delta_C$  68.0]. The HMBC correlations of H-1'/C-20, H-1'/C-2', H-2'/C-20, H-2'/C-21, H-23/C-2', and H-23/C-21 afforded the construction of 4-imidazolidinone conjugated to *N*-methyl-L-Orn moiety. The analysis of HRESI-MS/MS data of **2** verified the NMR-based structural characterization, which was also supported by comparison with its predicted HRESI-MS/MS spectrum proposed from CFM-ID 3.0.

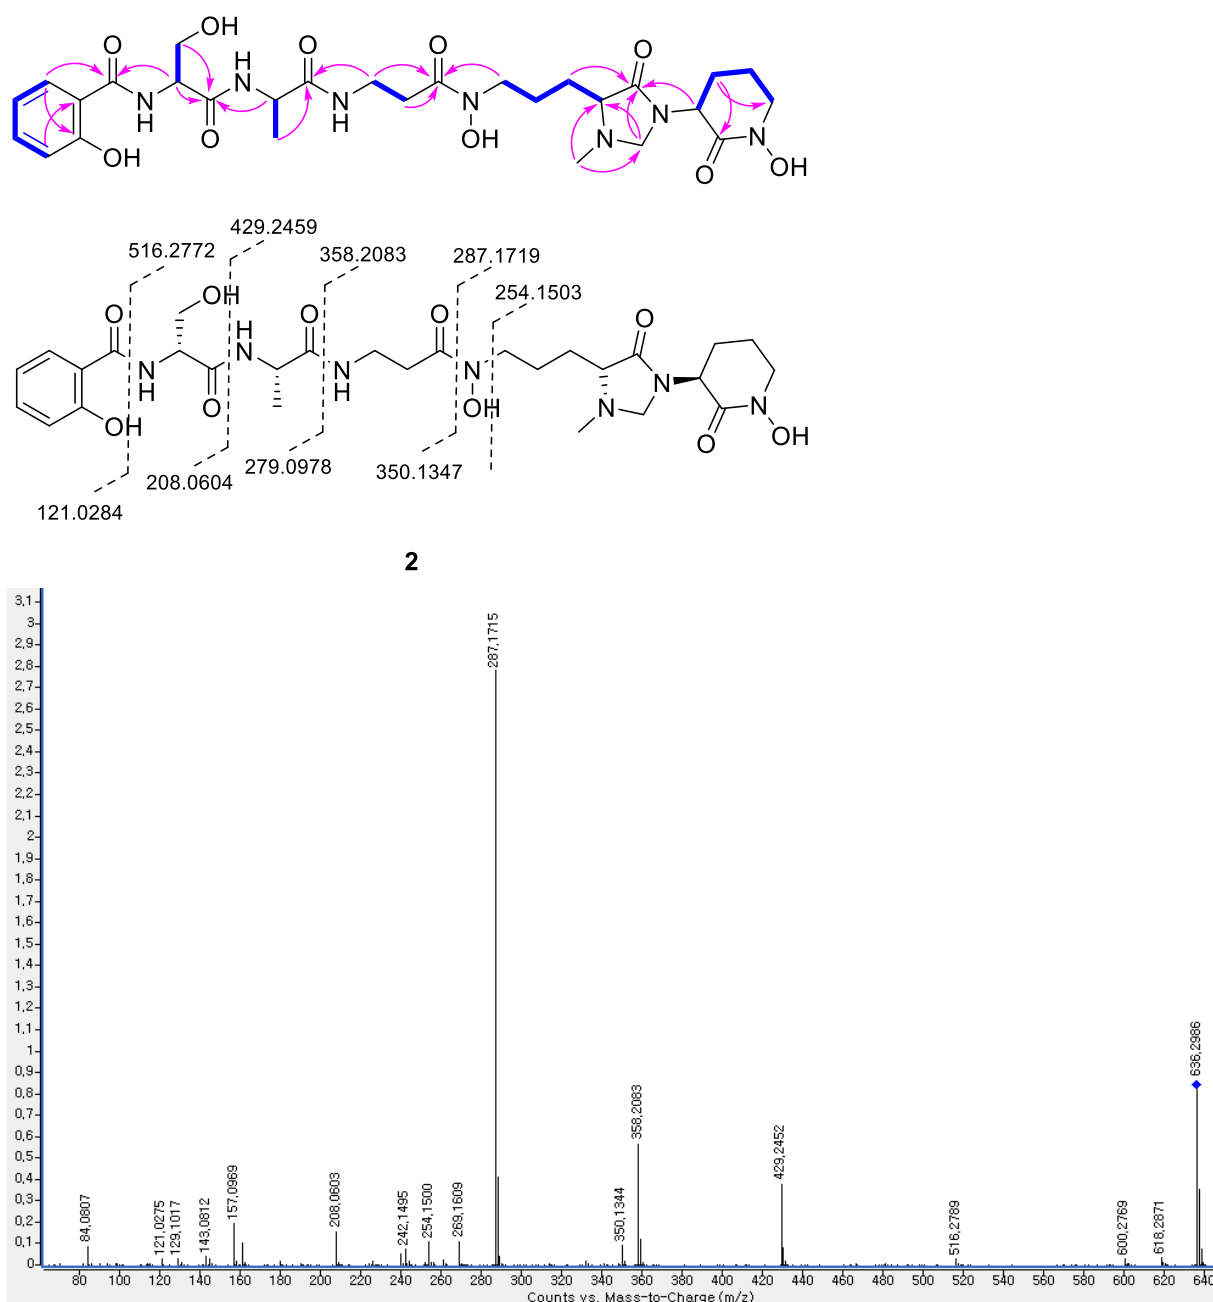

**Figure S14.** 2D NMR data and MS/MS fragment ion pattern of **2**. Blue bonds indicate  $^1H$ - $^1H$  COSY

correlations and pink arrows indicated HMBC correlations.

### Structure elucidation of **3**

The molecular formula of compound **3** was determined to be  $C_{27}H_{38}N_6O_{10}$  based on the deprotonated ion peak at  $m/z$  605.2568  $[M-H]^-$  (Calcd. for  $C_{27}H_{37}N_6O_{10}^-$ , 605.2571) in the negative-ion mode HR-ESIMS. Inspection of  $^1H$  and  $^{13}C$  NMR spectra of **3** indicated that the NMR data of **3** was similar with that of **1** except for some discrepancies. The major difference was that the *N*-methyl group in **2** was absent at C-20 ( $\delta_C$  36.7) in **3**. The  $^3J_{HH}$  vicinal correlations from H<sub>2</sub>-17 to H<sub>2</sub>-20 in  $^1H$ - $^1H$ -COSY as well as HMBC correlations of H<sub>2</sub>-19/C-21 and H-23/C-21 supported the converted substructure in **3**. In addition, HMBC correlations from H<sub>3</sub>-1' ( $\delta_H$  2.94) to C-21 and C-23 led to the confirmation of *N*-methylation at nitrogen between C-21 and C-23. Another difference was present in the terminal ornithine moiety; an interesting oxygenated methine [ $\delta_H$  5.75 (1H, brs);  $\delta_C$  82.0] was assigned at C-26 by COSY correlations from H-23 to H-26 as well as a HMBC correlation from H<sub>2</sub>-24 to C-26. According to the molecular formula of **3**,  $C_{27}H_{38}N_6O_{10}$ , 12 unsaturation degrees of **3** was deduced, which suggested one additional unsaturation degree in the terminal ornithine moiety of **3**. To allocate one unsaturation degree in the terminal ornithine moiety, the presence of epoxide ring was deduced between C-26 and nitrogen atom, affording the elucidation of novel structural moiety, 7-oxa-1-azabicyclo[4.1.0]heptan-2-one, which has rarely been reported. The proposed substructure was also verified by the analysis of its HRESI-MS/MS fragmentation data where detection of the characteristic ion at  $m/z$  143.0814 confirmed the assignment of 7-oxa-1-azabicyclo[4.1.0]heptan-2-one residue, which was also supported by comparison with its predicted HRESI-MS/MS spectrum proposed from CFM-ID 3.0. The stereochemistry of **3** at C-8, C-11, and C-23 was determined as same to compound **2** by the consideration of spectroscopic data patterns and deduced from the same biosynthetic logic.

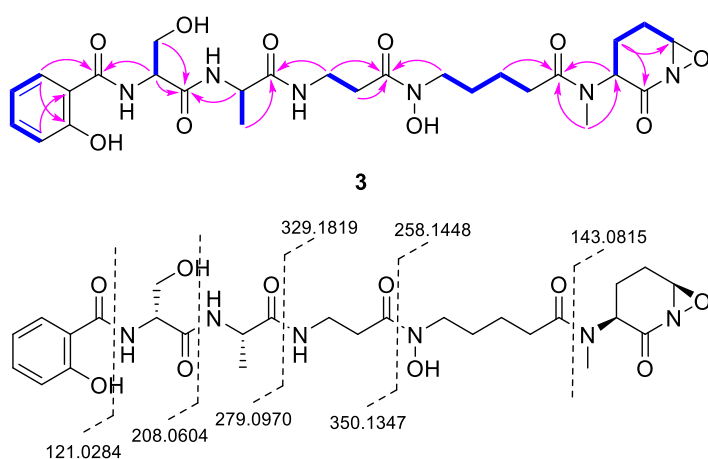

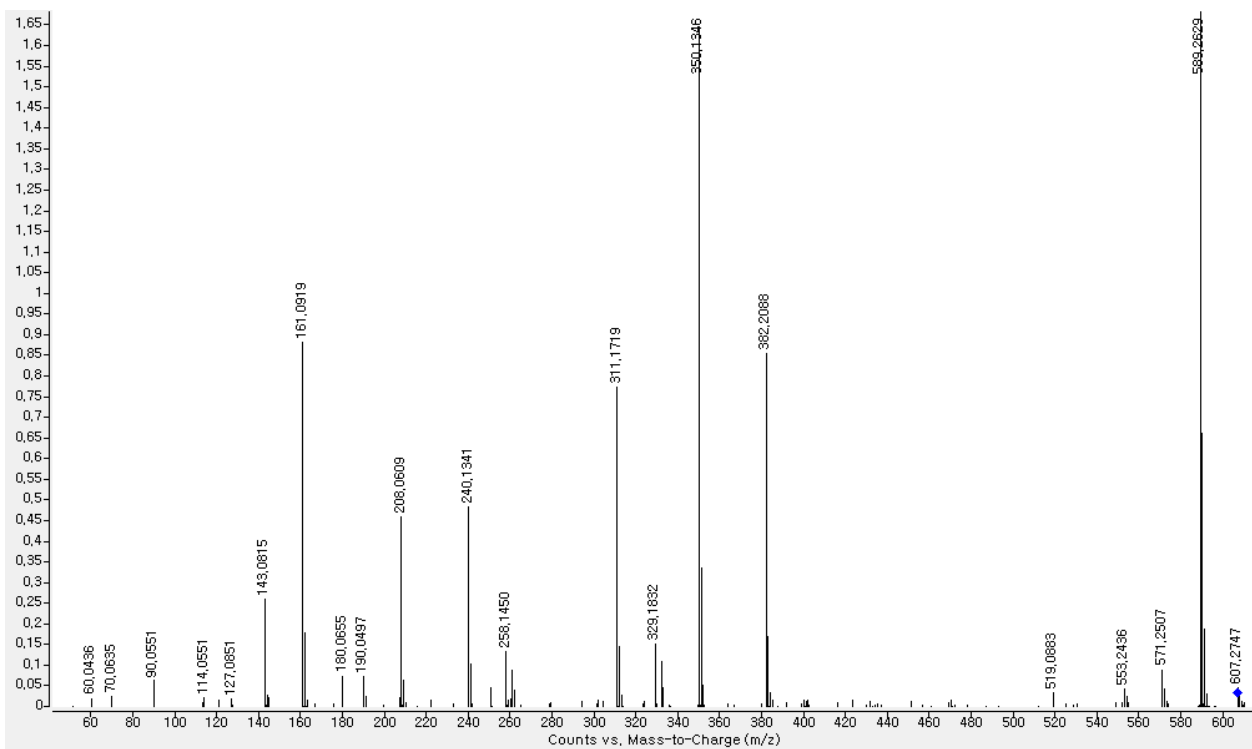

**Figure S15.** 2D NMR data and MS/MS fragment ion pattern of **3**. Blue bonds indicate  $^1\text{H}$ - $^1\text{H}$  COSY correlations and pink arrows indicated HMBC correlations.



### Structure elucidation of **4**

HRESI-MS analysis of **4** suggested a molecular formula of  $C_{16}H_{21}N_3O_7$  from a pseudomolecular ion peak at  $m/z$  368.1451  $[M+H]^+$  ( $C_{16}H_{22}N_3O_7^+$ , calcd. 368.1458). Comparison of spectra obtained for **4** and **1** proposed that the structure of **4** shares the salicylic acid, serine,  $\alpha$ -alanine, and  $\beta$ -alanine units of **1**. This deduction was verified by 2D NMR ( $^1H$ - $^1H$  COSY, HSQC, and HMBC data) of **4** especially, not only  $^3J_{HH}$  vicinal correlations between H<sub>2</sub>-14 and H<sub>2</sub>-15 in  $^1H$ - $^1H$  COSY but also HMBC correlations of H<sub>2</sub>-14/C-13, H<sub>2</sub>-14/C-16, and H<sub>2</sub>-15/C-16. In addition, distinctive fragment ions observed in HRESI-MS/MS data clearly supported the amino acid sequence of **4**.

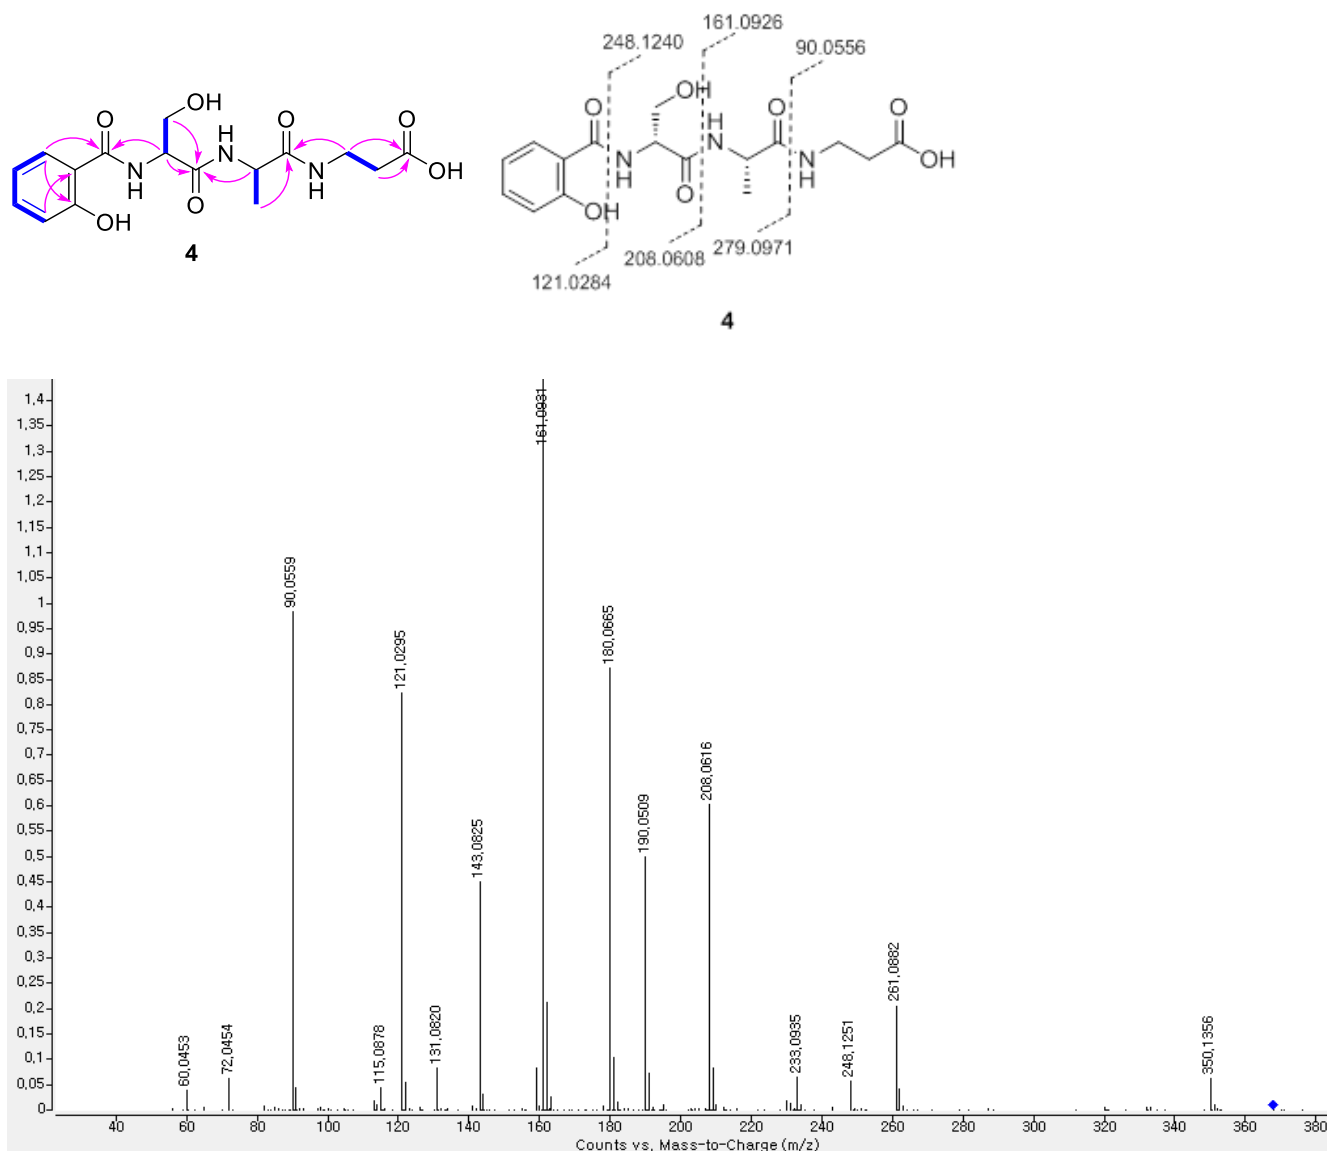

**Figure S16.** 2D NMR data and MS/MS fragment ion pattern of **4**. Blue bonds indicate  $^1H$ - $^1H$  COSY correlations and pink arrows indicated HMBC correlations.

### Structure prediction of derivative **6** with an $m/z$ 610.2831

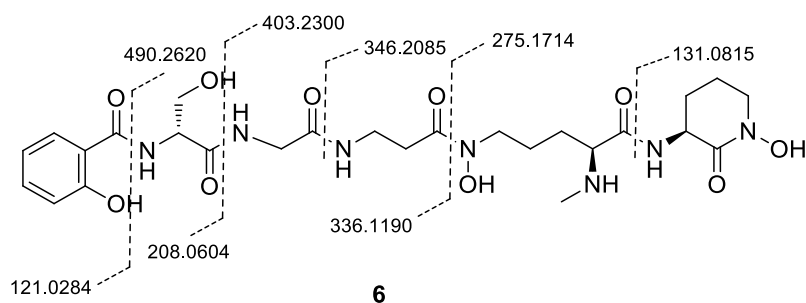

**Figure S17.** Proposed structure of **6** based on MS<sup>2</sup> fragmentation.

Derivative **6** ( $m/z$  610.2829) was assigned the molecular formula C<sub>26</sub>H<sub>39</sub>N<sub>7</sub>O<sub>10</sub>, corresponding to loss of a CH<sub>2</sub> unit ( $\Delta m/z = 14.016$ ) compared to **1** ([M+H]<sup>+</sup> C<sub>27</sub>H<sub>42</sub>N<sub>7</sub>O<sub>10</sub><sup>+</sup>, calcd. 624.2993). Identical fragments with  $m/z$  121.0286,  $m/z$  180.0656 and  $m/z$  208.0606 confirm the link between salicylic acid and serine unit like in **1**. Fragment  $m/z$  275.1714 confirms no changes on the double ornithine part on the right side of the molecule. Other fragments for **6** that occur either during neutral loss of salicylic acid and the first serine moiety ( $m/z$  490.254 and  $m/z$  403.2291), or during fragment loss of the ornithine moieties ( $m/z$  452.2114 and  $m/z$  336.1194) are replaced and shifted by  $\Delta m/z = 14.016$  compared to their counterparts in **1**. This corresponds to loss of a CH<sub>2</sub> unit which was localized as a substitution of glycine instead of alanine. The presence of  $\beta$ -alanine can be confirmed by a small fragment formed from  $\beta$ -alanine and ornithine ( $m/z$  145.0972) residues, which exists for MS/MS spectra of both **1** and **6**. Alanine however, is replaced by glycine which is indicated by a very dominant key fragment ( $m/z$  129.0659) that only occurs during fragmentation of **6** but not for **1**. *Vice versa*, the corresponding alanine fragment ( $m/z$  143.0815) can only be detected during fragmentation of **1** but not for **6**.

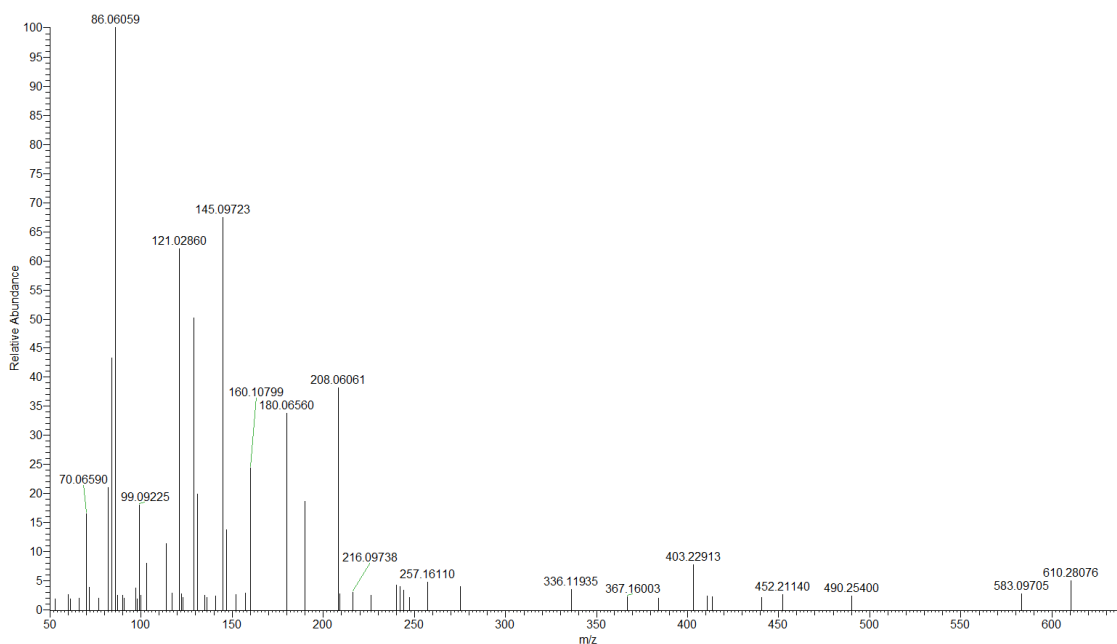

**Figure S18.** MS<sup>2</sup> spectrum of **6** at  $m/z$  610.2829 [M+H]<sup>+</sup> (C<sub>26</sub>H<sub>40</sub>N<sub>7</sub>O<sub>10</sub><sup>+</sup>, calcd. 610.2831).

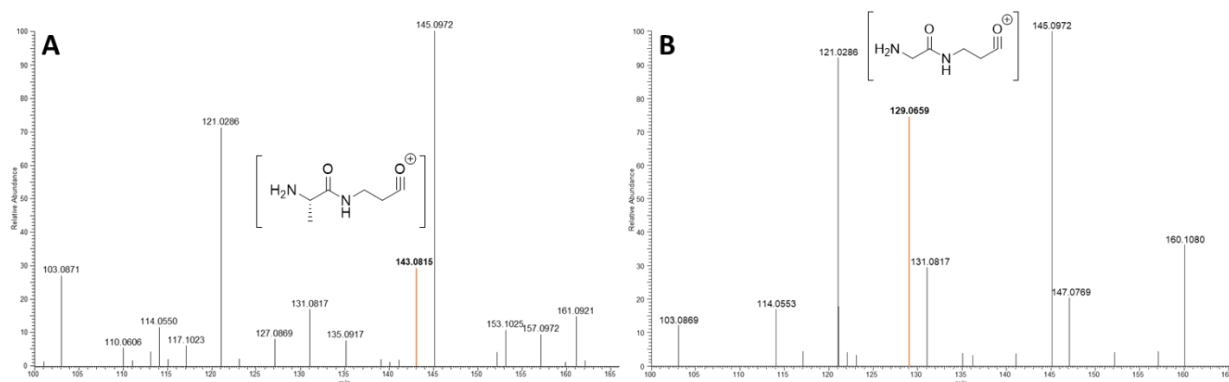

**Figure S19.** Comparison of partial MS<sup>2</sup> of **1** (A) and **6** (B) used for confirmation of an alanine to glycine substitution. Corresponding unique key fragments  $m/z$  143.0815 (**1**, A) and  $m/z$  129.0659 (**6**, B) are highlighted in red.

### Structure prediction of derivative **7** with an $m/z$ 640.2933

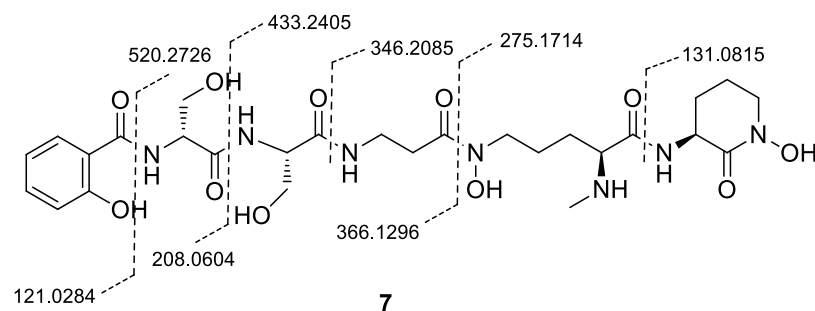

**Figure S20.** Proposed structure of **7** based on MS<sup>2</sup> fragmentation.

Compound **7** with HRESI-MS  $m/z$  [M+H]<sup>+</sup> 640.2947 is assigned the chemical formula C<sub>27</sub>H<sub>41</sub>N<sub>7</sub>O<sub>11</sub>, (C<sub>27</sub>H<sub>42</sub>N<sub>7</sub>O<sub>11</sub><sup>+</sup>, calcd. 640.2937). Fragments with  $m/z$  121.0286, 180.0654 and 208.0604 occur in MS/MS spectra for both compounds (**7** and **1**) and confirm the intact salicylic acid and first serine moiety. Fragments found in both spectra with  $m/z$  346.2085 and 275.1712 represent moieties carrying hydroxylated ornithine, *N*-methyl ornithine and  $\beta$ -alanine, respectively. In contrast to the spectra of **1**, the MS/MS spectra of **7** features new fragments corresponding to parts of the parent ion containing an additional serine moiety in place of alanine. Accordingly, those fragments are consequently shifted by  $\Delta m/z = 15.995$  (Oxygen) compared to their counterparts found in **1** (e.g.  $m/z$  504.2777  $\rightarrow$  520.2690, 417.2457  $\rightarrow$  433.2440, 448.2199  $\rightarrow$  464.2101 and 143.0815  $\rightarrow$  159.0765). The location of oxygen changing the alanine (**1**) into a serine (**7**) was determined based on comparison of key fragments  $m/z$  161.0921 unique for MS/MS of **1** and  $m/z$  177.0865 unique for MS/MS of **7**.

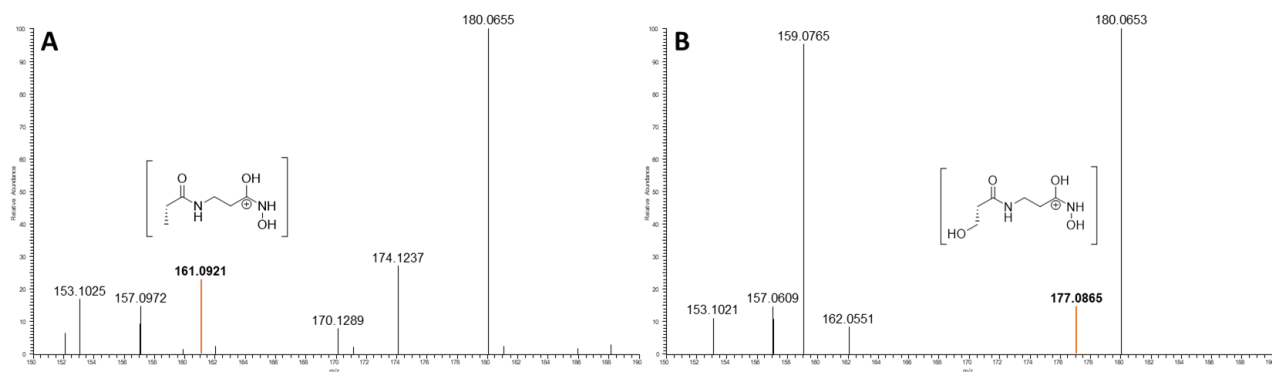

**Figure S21.** Comparison of partial MS<sup>2</sup> of **1** (A) and **7** (B) used for confirmation of an alanine to serine substitution. Corresponding unique key fragments  $m/z$  161.0921 (**1**, A) and  $m/z$  177.0865 (**7**, B) are highlighted in red.

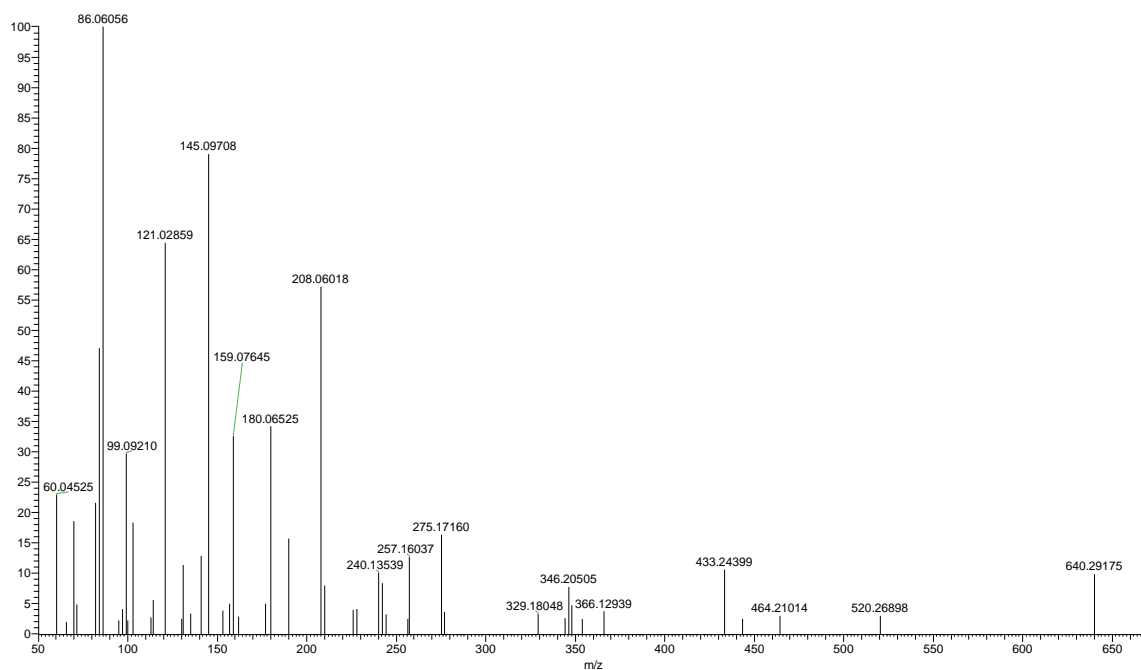

**Figure S22.** MS<sup>2</sup> spectrum of **7** at  $m/z$  640.2947 [M+H]<sup>+</sup> (C<sub>27</sub>H<sub>42</sub>N<sub>7</sub>O<sub>11</sub><sup>+</sup>, calcd. 640.2937).

## 9. Marfey's analysis

### Determination of the absolute configuration of amino acids of compound **1** (Marfey's Derivatization Reaction).

Compound **1** (0.3 mg) was hydrolyzed with 6 N HCl (500  $\mu$ L) for 1 h at 110 °C. After cooling to room temperature, the hydrolysate of **1** was evaporated *in vacuo* to eliminate traces of HCl. Distilled water (400  $\mu$ L) was added to the hydrolysate mixture and then evaporated to remove traces of HCl; this procedure was carried out three times. The dried hydrolysate mixture of **1**, as well as the standard amino acids (L/D-Ala, Orn, and Ser, and *N*-Me-L-Orn), were dissolved in 1 N NaHCO<sub>3</sub> (100  $\mu$ L) and then reacted with 50  $\mu$ L of L-FDAA (10 mg/mL in acetone). Each hydrolysate was heated for 10 min at 80°C. Each mixture was quenched with 2 N HCl (50  $\mu$ L) and evaporated *in vacuo*. The residue was dissolved in 200  $\mu$ L of MeOH. Each aliquot (5  $\mu$ L) acquired from the hydrolysate mixtures was directly injected onto the LC/MS (Phenomenex Luna C18, 4.6  $\times$  100 mm, 3.5  $\mu$ m, flow rate: 0.3 mL/min), and a full scan in negative ion mode (scan range from *m/z* 100 to 1200) was applied to confirm the retention times of the L-FDAA-derivatized amino acids. The mobile phase, consisting of formic acid in distilled water (0.1% v/v) (A) and acetonitrile (B), was performed with a gradient solvent system as follows: 20–40% (B) for 10 min, 100% (B) isocratic for 5 min, and then 20% (B) isocratic for 5 min, to conduct a post-run washing procedure for the column. The retention times of the L-FDAA derivatized amino acids used as standards were 18.2 min (L-Ala, *m/z* 340 [M-H]<sup>-</sup>), 20.2 min (D-Ala, *m/z* 340 [M-H]<sup>-</sup>), 25.4 min (L-Orn, *m/z* 635 [M-H]<sup>-</sup>), 24.0 min (D-Orn, *m/z* 635 [M-H]<sup>-</sup>), 14.9 min (L-Ser, *m/z* 357 [M-H]<sup>-</sup>), 20.7 min (D-Ser, *m/z* 357 [M-H]<sup>-</sup>), and 25.8 min (*N*-Me-L-Orn, *m/z* 649 [M-H]<sup>-</sup>). The retention times of the derivatized hydrolysate of **1** were L-Ala (18.2 min), L-Orn (25.4 min), D-Ser (20.7 min), and *N*-Me-L-Orn (25.8 min).

### Determination of the Absolute Configuration of Amino Acids in **5** (Marfey's Derivatization Reaction).

Ga-complex of **5** (0.1 mg) was hydrolyzed in 6N HCl (500  $\mu$ L) for 5 h at 90 °C. After cool down at room temperature, the hydrolysate mixture was diluted by H<sub>2</sub>O (5 mL) and residue HCl was removed under reduced pressure. The trace HCl was removed by repeated the procedure (5 mL of H<sub>2</sub>O) for three times. Afterwards, the hydrolysate was lyophilized for 30 min. Marfey's reaction was performed by adding 100  $\mu$ L of 1 M of NaHCO<sub>3</sub> aq. solution, as well as 50  $\mu$ L of L-FDAA in acetone as 10 mg/mL (fresh preparation), and the mixture was heated at 50 °C for 45 min under shaking at 600 rpm. The reaction was quenched by adding 40  $\mu$ L of 2 N HCl aq. solution, adjust the pH at 7. Neutralized reaction mixture was diluted by 1:1 v/v of 50% MeCN/H<sub>2</sub>O (LCMS grade). The final mixture was diluted with 1:100 in 50% MeCN/H<sub>2</sub>O and ready for LC-HRMS analysis. 0.1 mg of standard amino acids: L-serine, D-serine, L-alanine, D-alanine,  $\beta$ -alanine, L-ornithine, D-ornithine were subjected to Marfey's reaction by the same procedure as described above.

LC-ESI-HRMS were performed on a Dionex Ultimate3000 system coupled with a Luna Omega C18 column (100  $\times$  2.1 mm, particle size 1.6  $\mu$ m, pore diameter 100 Å, Phenomenex) combined with Q-Exactive Plus mass spectrometer (Thermo Scientific) equipped with an electrospray ion (HESI) source.

Column oven was set to 40 °C; scan range of full MS was set to  $m/z$  150 to 2,000 with resolution of 70,000 and AGC target  $3e6$  and maximum IT 100 ms under positive and negative mode with centroid data type. MS<sup>2</sup> was performed to choose top10 intensive ions under positive mode with resolution of 17,500 and AGC target  $1e5$  and maximum IT 50 ms and (N)CE 28 with centroid data type. The spray voltage (+) was set to 4000 Volt, and (-) was set to 3300 Volt. The capillary temperature (+/-) was set to 340 °C and probe heater temperature (+/-) was set to 200 °C. The sheath gas flow (+/-) was set to 35 L/min and Aux gas flow (+/-) to 5 L/min. Max spray current (+) and (-) was set to 100 Volt. S-Lens RF level was set to 50. The FDAA derivatives were separated under the gradient: 0 – 0.5 min, 5% B; 0.5 – 9 min, 5% – 97% B; 9 – 12 min, 97% B; 12 – 13 min, 97% – 5% B; 13 – 18 min, 5% B (A: 0.1% FA; B: MeCN with 0.1% FA), with flow rate of 0.3 mL/min and injection volume is 5  $\mu$ L. The retention times of the L-FDAA derivatized amino acids used as standards were 5.94 min (L-Ala,  $m/z$  342.1038 [M+H]<sup>+</sup>), 6.23 min (D-Ala,  $m/z$  342.1038 [M+H]<sup>+</sup>), 5.91 min ( $\beta$ -Ala,  $m/z$  342.1038 [M+H]<sup>+</sup>), 4.72 min/4.89 min (L-Orn,  $m/z$  385.1461 [M+H]<sup>+</sup>), 4.58 min/4.89 min (D-Orn,  $m/z$  385.1461 [M+H]<sup>+</sup>), 5.36 min (L-Ser,  $m/z$  358.0987 [M+H]<sup>+</sup>), 5.42 min (D-Ser,  $m/z$  358.0987 [M+H]<sup>+</sup>). The retention times of the derivatized hydrolysate of **5** were L-Ala (5.94 min),  $\beta$ -Ala (5.91 min), L-Orn (4.72 min), D-Ser (5.42 min).

## 10. Physical data of isolated compounds

Madurastatin A2 (**1**). Amorphous powder;  $[\alpha]^{25,D}$  -12.1 (*c* 0.05, MeOH); UV (MeOH)  $\lambda_{\max}$  (log  $\epsilon$ ) 202 (4.23), 238 (1.31), 299 (0.76) nm;  $^1\text{H}$  (800 MHz) and  $^{13}\text{C}$  NMR (200 MHz), see Table S4 and Table S5, respectively; positive-mode HR-ESI-MS  $m/z$  624.3022  $[\text{M}+\text{H}]^+$  (Calcd. for  $\text{C}_{27}\text{H}_{42}\text{N}_7\text{O}_{10}^+$ , 624.2993).

Madurastatin E1 (**2**). Amorphous powder;  $[\alpha]^{25,D}$  -8.6 (*c* 0.04, MeOH); UV (MeOH)  $\lambda_{\max}$  (log  $\epsilon$ ) 202 (4.20), 238 (1.25), 299 (0.73) nm;  $^1\text{H}$  (800 MHz) and  $^{13}\text{C}$  NMR (200 MHz), see Table S4 and Table S5, respectively; positive-mode HR-ESI-MS  $m/z$  636.3017  $[\text{M}+\text{H}]^+$  (Calcd. for  $\text{C}_{28}\text{H}_{42}\text{N}_7\text{O}_{10}^+$ , 636.2993).

Madurastatin F (**3**). Amorphous powder;  $[\alpha]^{25,D}$  -6.4 (*c* 0.03, MeOH); UV (MeOH)  $\lambda_{\max}$  (log  $\epsilon$ ) 202 (4.25), 239 (1.24), 298 (0.76) nm;  $^1\text{H}$  (800 MHz) and  $^{13}\text{C}$  NMR (200 MHz), see Table S4 and Table S5, respectively; negative-mode HR-ESI-MS  $m/z$  605.2568  $[\text{M}-\text{H}]^-$  (Calcd. for  $\text{C}_{27}\text{H}_{37}\text{N}_6\text{O}_{10}^-$ , 605.2571).

Madurastatin G1 (**4**). Amorphous powder;  $[\alpha]^{25,D}$  -7.7 (*c* 0.03, MeOH); UV (MeOH)  $\lambda_{\max}$  (log  $\epsilon$ ) 202 (4.09), 239 (1.15), 298 (0.74) nm;  $^1\text{H}$  (800 MHz) and  $^{13}\text{C}$  NMR (200 MHz), see Table S4 and Table S5, respectively; positive-mode HR-ESI-MS  $m/z$  368.1451  $[\text{M}+\text{H}]^+$  (Calcd. for  $\text{C}_{16}\text{H}_{22}\text{N}_3\text{O}_7^+$ , 368.1458).

Madurastatin A1 (**5**,  $\text{Ga}^{3+}$ -complex). Orange powder;  $[\alpha]^{25,D}$  269.2 (*c* 0.01, 50% MeOH); UV (MeOH)  $\lambda_{\max}$  (log  $\epsilon$ ) 202, 239, 298 nm;  $^1\text{H}$  (600 MHz) and  $^{13}\text{C}$  NMR (150 MHz), see Table S6; positive-mode HR-ESI-MS  $m/z$  672.1891  $[\text{M}+\text{H}]^+$  (Calcd. for  $\text{C}_{27}\text{H}_{37}\text{N}_7\text{O}_9\text{Ga}^+$ , 672.1909).

## 11. Analytical Data

**Table S4.** <sup>1</sup>H NMR (800 MHz) data of compounds **1–4** in MeOH-*d*<sub>4</sub>.<sup>a</sup>

| Position | <b>1</b>                                    | <b>2</b>                                    | <b>3</b>                                    | <b>4</b>                                    |
|----------|---------------------------------------------|---------------------------------------------|---------------------------------------------|---------------------------------------------|
|          | $\delta_{\text{H}}$                         | $\delta_{\text{H}}$                         | $\delta_{\text{H}}$                         | $\delta_{\text{H}}$                         |
| 1        | 7.91 dd (7.5, 1.0)                          | 7.90 dd (7.5, 1.0)                          | 7.90 dd (7.5, 1.0)                          | 7.90 dd (7.5, 1.0)                          |
| 2        | 6.92 t (7.5)                                | 6.92 t (7.5)                                | 6.92 t (7.5)                                | 6.92 t (7.5)                                |
| 3        | 7.39 t (7.5)                                | 7.39 t (7.5)                                | 7.39 t (7.5)                                | 7.39 t (7.5)                                |
| 4        | 6.93 dd (7.5, 1.0)                          |
| 8        | 4.59 dd (5.0, 4.5)                          | 4.59 dd (5.0, 4.5)                          | 4.59 dd (5.0, 4.5)                          | 4.58 dd (5.0, 4.5)                          |
| 9        | 3.90 dd (11.0, 4.5),<br>3.95 dd (11.0, 5.0) | 3.89 dd (11.0, 4.5),<br>3.94 dd (11.0, 5.0) | 3.88 dd (11.0, 4.5),<br>3.92 dd (11.0, 5.0) | 3.90 dd (11.0, 4.5),<br>3.95 dd (11.0, 5.0) |
| 11       | 4.32 q (7.0)                                | 4.33 q (7.0)                                | 4.34 q (7.0)                                | 4.36 q (7.0)                                |
| 12       | 1.38 d (7.0)                                | 1.37 d (7.0)                                | 1.37 d (7.0)                                | 1.36 d (7.0)                                |
| 14       | 3.43 m, 3.49 m                              | 3.45 m                                      | 3.45 m                                      | 3.40 m, 3.43 m                              |
| 15       | 2.54 m                                      | 2.70 m                                      | 2.69 m                                      | 2.46 t (6.5)                                |
| 17       | 3.61 m                                      | 3.57 m, 3.61 m                              | 3.54 m, 3.59 m                              |                                             |
| 18       | 1.75 m                                      | 1.78 m                                      | 1.37 m, 1.42 m                              |                                             |
| 19       | 1.77 m                                      | 1.96 m                                      | 1.59 m                                      |                                             |
| 20       | 3.56 m                                      | 3.05 m                                      | 2.21 m                                      |                                             |
| 23       | 4.50 m                                      | 4.66 m                                      | 4.21 m                                      |                                             |
| 24       | 1.84 m, 2.07 m                              | 1.93 m, 2.32 m                              | 1.96 m, 2.11 m                              |                                             |
| 25       | 1.98 m, 2.03 m                              | 2.02 m, 2.06 m                              | 1.76 m, 2.37 m                              |                                             |
| 26       | 3.59 m, 3.64 m                              | 3.58 m, 3.65 m                              | 5.75 brs                                    |                                             |
| 1'       | 2.55 s                                      | 2.41 s                                      | 2.94 s                                      |                                             |
| 2'       |                                             | 3.77 d (4.0), 4.34 d (4.0)                  |                                             |                                             |

<sup>a</sup>Coupling constants (in parentheses) are in Hz.



**Table S5.**  $^{13}\text{C}$  NMR (200 MHz) data of compounds **1–4** in  $\text{MeOH-}d_4$ .<sup>a</sup>

| Position | <b>1</b>   | <b>2</b>   | <b>3</b>   | <b>4</b>   |
|----------|------------|------------|------------|------------|
|          | $\Delta c$ | $\delta c$ | $\delta c$ | $\delta c$ |
| 1        | 130.1 d    | 130.0 d    | 130.1 d    | 130.0 d    |
| 2        | 120.1 d    | 120.1 d    | 120.1 d    | 120.1 d    |
| 3        | 134.6 d    | 134.6 d    | 134.7 d    | 134.7 d    |
| 4        | 117.8 d    | 117.9 d    | 118.0 d    | 117.9 d    |
| 5        | 160.1 s    | 159.9 s    | 160.1 s    | 160.0 s    |
| 6        | 117.5 s    | 117.6 s    | 117.6 s    | 117.5 s    |
| 7        | 170.1 s    | 169.9 s    | 170.0 s    | 170.1 s    |
| 8        | 57.1 d     | 57.1 d     | 57.1 d     | 57.2 d     |
| 9        | 62.5 t     | 62.6 t     | 62.7 t     | 62.7 t     |
| 10       | 172.7 s    | 172.5 s    | 172.7 s    | 172.4 s    |
| 11       | 50.5 d     | 50.5 d     | 50.5 d     | 50.4 d     |
| 12       | 17.4 q     | 17.4 q     | 17.5 q     | 17.6 q     |
| 13       | 174.7 s    | 174.5 s    | 174.7 s    | 174.6 s    |
| 14       | 36.1 t     | 36.1 t     | 36.2 t     | 36.6 t     |
| 15       | 32.6 t     | 32.6 t     | 32.7 t     | 35.5 t     |
| 16       | 173.9 s    | 173.3 s    | 173.7 s    | 176.6 s    |
| 17       | 47.7 t     | 48.4 t     | 48.1 t     |            |
| 18       | 22.6 t     | 22.8 t     | 21.3 t     |            |
| 19       | 28.9 t     | 25.8 t     | 26.6 t     |            |
| 20       | 62.8 d     | 67.1 d     | 36.7 t     |            |
| 21       | 174.1 s    | 175.6 s    | 168.9 s    |            |
| 22       | 165.5 s    | 164.7 s    | 165.1 s    |            |
| 23       | 51.2 d     | 52.4 d     | 62.2 d     |            |
| 24       | 28.1 t     | 29.1 t     | 27.3 t     |            |
| 25       | 21.4 t     | 21.7 t     | 29.5 t     |            |
| 26       | 52.2 t     | 52.0 t     | 82.0 d     |            |
| 1'       | 32.6 q     | 39.8 q     | 31.2 q     |            |
| 2'       |            | 68.0 t     |            |            |

<sup>a</sup>  $^{13}\text{C}$  NMR data extracted from HSQC and HMBC data.

**Table S6.** NMR Data (DMSO-*d*<sub>6</sub>, at 300 K) for madurastatin A1 (**5**, Ga<sup>3+</sup>-complex).<sup>a</sup>

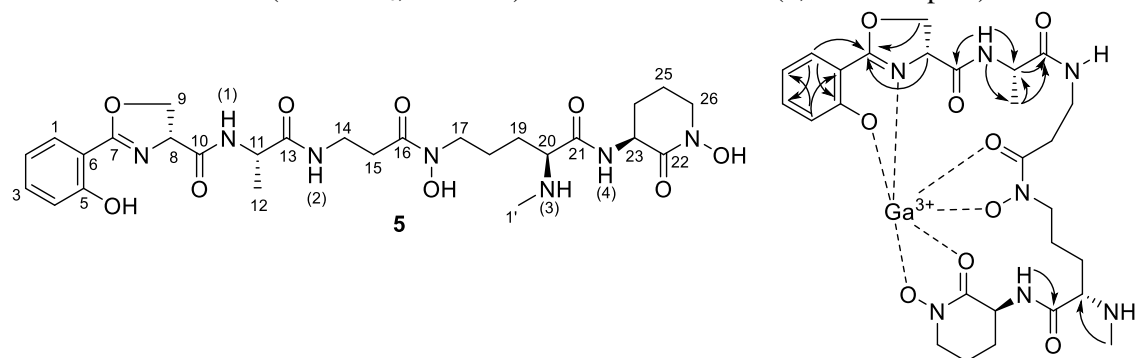

| Madurastatin A1 ( <b>5</b> , Ga-complex) |                                 |                                         |                              |            |
|------------------------------------------|---------------------------------|-----------------------------------------|------------------------------|------------|
| Position                                 | $\delta_C$ , mult. <sup>b</sup> | $\delta_H$ , mult. ( <i>J</i> in Hz)    | COSY                         | HMBC       |
| 1                                        | 129.37, CH                      | 7.55, d (8.51)                          | 2                            | 5, 3, 7    |
| 2                                        | 114.69, CH                      | 6.56, t (8.17)                          | 3, 5                         | 4, 6       |
| 3                                        | 135.61, CH                      | 7.32, t (6.77)                          | 2, 4                         | 1          |
| 4                                        | 122.35, CH                      | 6.62, d (8.83)                          | 3                            | 2, 6       |
| 5                                        | 167.73, qC                      |                                         |                              |            |
| 6                                        | 108.44, qC                      |                                         |                              |            |
| 7                                        | 170.46, qC                      |                                         |                              |            |
| 8                                        | 64.75, CH                       | 4.98, dd (10.69, 6.90)                  | 9a, 9b                       | 7          |
| 9                                        | 71.12, CH <sub>2</sub>          | 4.69, d (9.03)<br>4.43, dd (8.72, 6.54) | 8, 9b<br>8, 9a               | 7<br>7     |
| 10                                       | 171.61, qC                      |                                         |                              |            |
| 11                                       | 47.67, CH                       | 4.29, t (7.22)                          | 12, NH(1)                    | 13         |
| 12                                       | 13.81, CH <sub>3</sub>          | 1.13, d (7.27)                          | 11                           | 11, 13     |
| 13                                       | 172.88, qC                      |                                         |                              |            |
| 14                                       | 35.74, CH <sub>2</sub>          | 3.42, m<br>3.10, m<br>2.17, m           | 14b, NH(2)<br>14a, 15<br>14b |            |
| 15                                       |                                 |                                         |                              |            |
| 16                                       |                                 |                                         |                              |            |
| 17                                       |                                 |                                         |                              |            |
| 18                                       |                                 |                                         |                              |            |
| 19                                       | 29.70, CH <sub>2</sub>          | 1.17, m                                 |                              |            |
| 20                                       | 62.32, CH                       | 2.96, m                                 | 19, NH(3)                    |            |
| 21                                       | 172.25, qC                      |                                         |                              |            |
| 22                                       |                                 |                                         |                              |            |
| 23                                       | 46.19, CH                       | 4.50, m                                 | 24a, NH(4)                   |            |
| 24                                       | 25.30, m                        | 1.95, m                                 | 23                           |            |
| 25                                       |                                 | 1.67, m                                 |                              |            |
| 26                                       |                                 |                                         |                              |            |
| 1'                                       | 33.14, CH <sub>3</sub>          | 2.27, s                                 | NH(3)                        | 20         |
| NH(1)                                    |                                 | 8.70, d (7.38)                          | 11                           | 10, 11, 12 |
| NH(2)                                    |                                 | 7.40, brt (5.38)                        | 14a                          |            |
| NH(3)                                    |                                 | 7.22, t (5.55)                          | 1'                           |            |
| NH(4)                                    |                                 | 8.17, d (9.15)                          | 23                           | 21         |

<sup>a</sup> 600 MHz for <sup>1</sup>H NMR and 150 MHz for <sup>13</sup>C NMR

<sup>b</sup> numbers of attached protons were determined by analysis of 2D spectra.

**Table S7.** NMR Data (CD<sub>3</sub>OD, at 300 K) for synthetic salicyl-D-Ser-Ala-βAla-OH (**4a**) and salicyl-L-Ser-Ala-βAla-OH (**4b**)<sup>a,b,c</sup>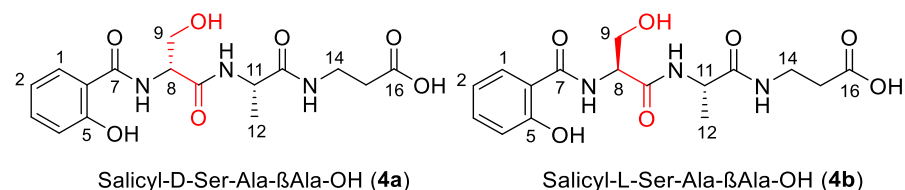

| position | Salicyl-D-Ser-Ala-βAla-OH ( <b>4a</b> ) |                                                  |      |          | Isolated compound <b>4</b> |                                             | Salicyl-L-Ser-Ala-βAla-OH ( <b>4b</b> ) |                                                  |
|----------|-----------------------------------------|--------------------------------------------------|------|----------|----------------------------|---------------------------------------------|-----------------------------------------|--------------------------------------------------|
|          | δ <sub>C</sub> , mult. <sup>b</sup>     | δ <sub>H</sub> , mult. ( <i>J</i> in Hz)         | COSY | HMBC     | δ <sub>C</sub> , mult.     | δ <sub>H</sub> , mult. ( <i>J</i> in Hz)    | δ <sub>C</sub> , mult. <sup>b</sup>     | δ <sub>H</sub> , mult. ( <i>J</i> in Hz)         |
| 1        | 130.24, CH                              | 7.90, dd (8.22, 1.71)                            | 2    | 3, 5, 7  | 130.0 d                    | 7.90 dd (7.5, 1.0)                          | 130.31, CH                              | 7.90, dd (8.21, 1.63)                            |
| 2        | 118.14, CH                              | 6.93, t (8.25)                                   | 1, 3 | 4        | 120.1 d                    | 6.92 t (7.5)                                | 118.10, CH                              | 6.93, t (8.25)                                   |
| 3        | 134.93, CH                              | 7.39, td (8.25, 1.71)                            | 2, 4 | 1, 5     | 134.7 d                    | 7.39 t (7.5)                                | 134.89, CH                              | 7.39, td (8.25, 1.71)                            |
| 4        | 120.43, CH                              | 6.93, d (8.25)                                   | 3    | 2        | 117.9 d                    | 6.93 dd (7.5, 1.0)                          | 120.43, CH                              | 6.93, d (8.25)                                   |
| 5        | 160.14, qC                              |                                                  |      |          | 160.0 s                    |                                             | 160.06, qC                              |                                                  |
| 6        | 117.69, qC                              |                                                  |      |          | 117.5 s                    |                                             | 117.74, qC                              |                                                  |
| 7        | 170.25, qC                              |                                                  |      |          | 170.1 s                    |                                             | 169.96, qC                              |                                                  |
| 8        | 57.50, CH                               | 4.58, t (5.29)                                   | 9a   | 9, 10    | 57.2 d                     | 4.58 dd (5.0, 4.5)                          | 56.83, CH                               | 4.66, t (5.85)                                   |
| 9        | 62.92, CH <sub>2</sub>                  | 3.94, dd (11.15, 5.37)<br>3.89, dd (11.15, 5.18) | 8    | 10<br>10 | 62.7 t                     | 3.95 dd (11.0, 5.0)<br>3.90 dd (11.0, 4.5), | 63.27, CH <sub>2</sub>                  | 3.98, dd (10.98, 5.40)<br>3.84, dd (10.88, 6.18) |
| 10       | 172.68, qC                              |                                                  |      |          | 172.4 s                    |                                             | 172.53, qC                              |                                                  |
| 11       | 50.73, CH                               | 4.35, q (7.23)                                   | 12   | 12, 13   | 50.4 d                     | 4.36 q (7.0)                                | 50.67, CH                               | 4.38, q (7.23)                                   |
| 12       | 17.89, CH <sub>3</sub>                  | 1.37, d (7.27)                                   | 11   | 13       | 17.6 q                     | 1.36 d (7.0)                                | 17.81, CH <sub>3</sub>                  | 1.38, d (7.19)                                   |
| 13       | 174.94, qC                              |                                                  |      |          | 174.6 s                    |                                             | 174.94, qC                              |                                                  |
| 14       | 36.49, CH <sub>2</sub>                  | 3.42-3.45, m                                     | 15   | 15, 16   | 36.6 t                     | 3.40 m, 3.43 m                              | 36.51, CH <sub>2</sub>                  | 3.42, t (6.96)                                   |
| 15       | 34.52, CH <sub>2</sub>                  | 2.52, t (7.00)                                   | 14   | 16       | 35.5 t                     | 2.46 t (6.5)                                | 34.54, CH <sub>2</sub>                  | 2.51, t (6.90)                                   |
| 16       | 175.21, qC                              |                                                  |      |          | 176.6 s                    |                                             | 175.27, qC                              |                                                  |

<sup>a</sup> 600 MHz for <sup>1</sup>H NMR and 150 MHz for <sup>13</sup>C NMR. <sup>b</sup> numbers of attached protons were determined by analysis of 2D spectra.

<sup>c</sup> synthesized by BIOSYNTAN GmbH (Robert-Rössle-Str. 10, D-13125 Berlin)

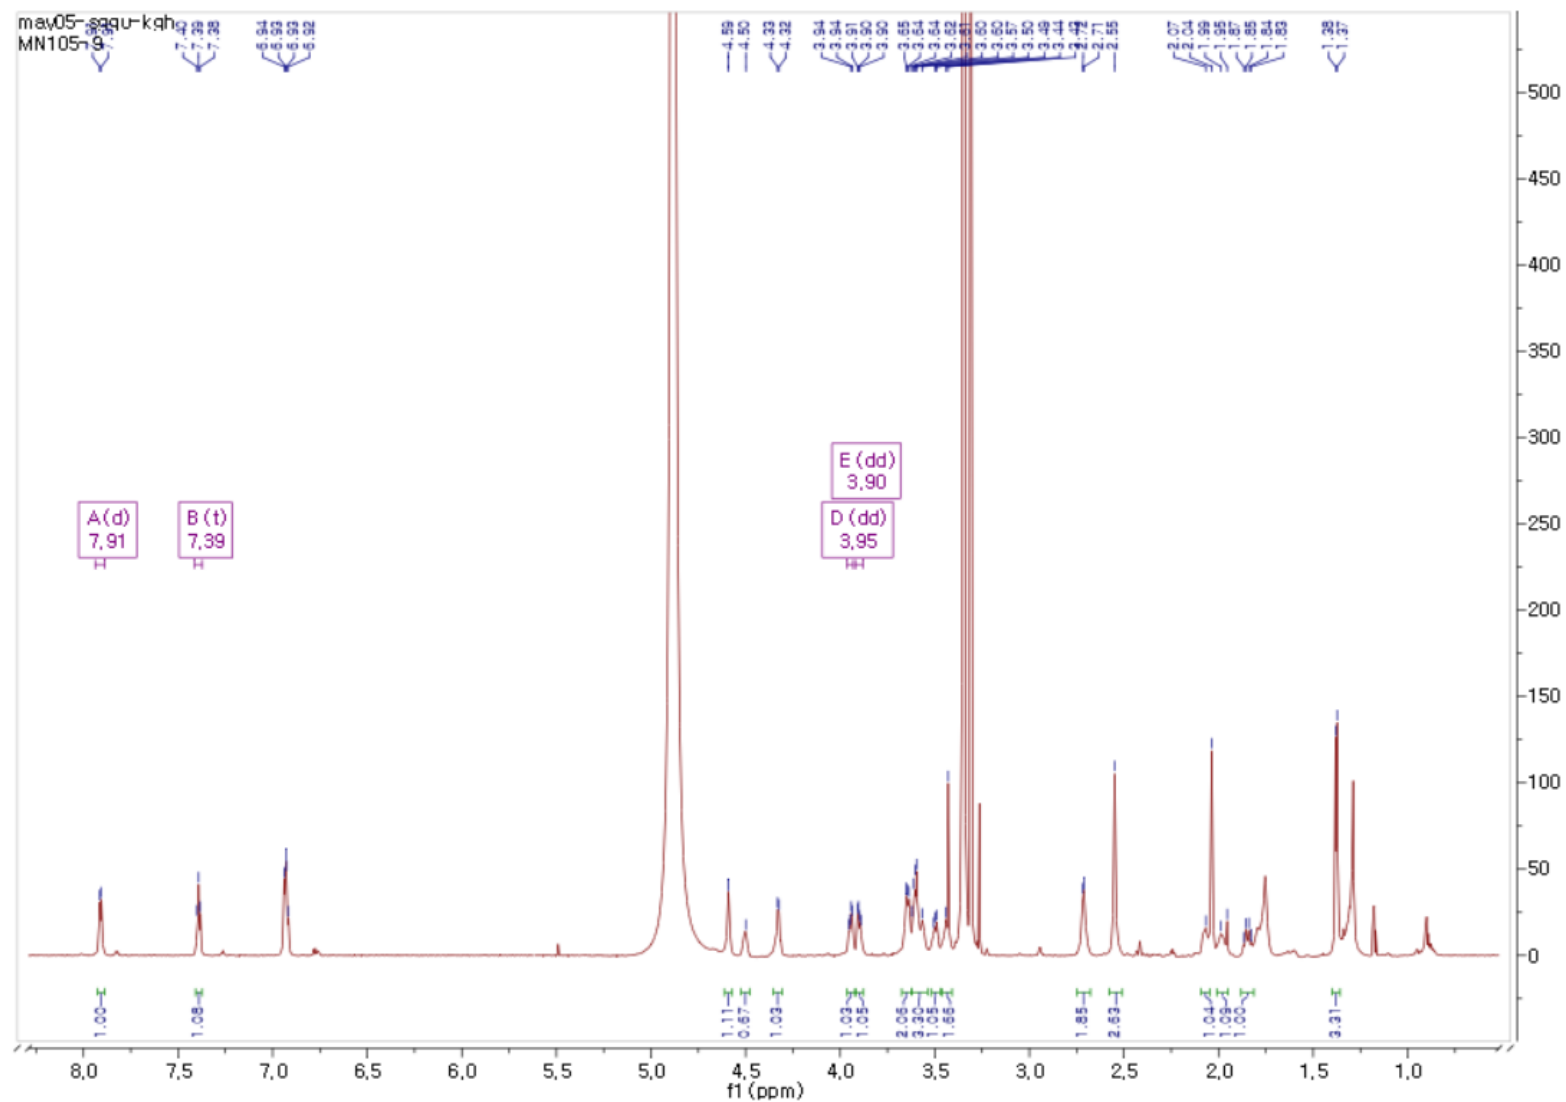

**Figure 23.**  $^1\text{H}$  NMR spectrum of madurastatin A2 (1) ( $\text{CD}_3\text{OD}$ , 800 MHz)

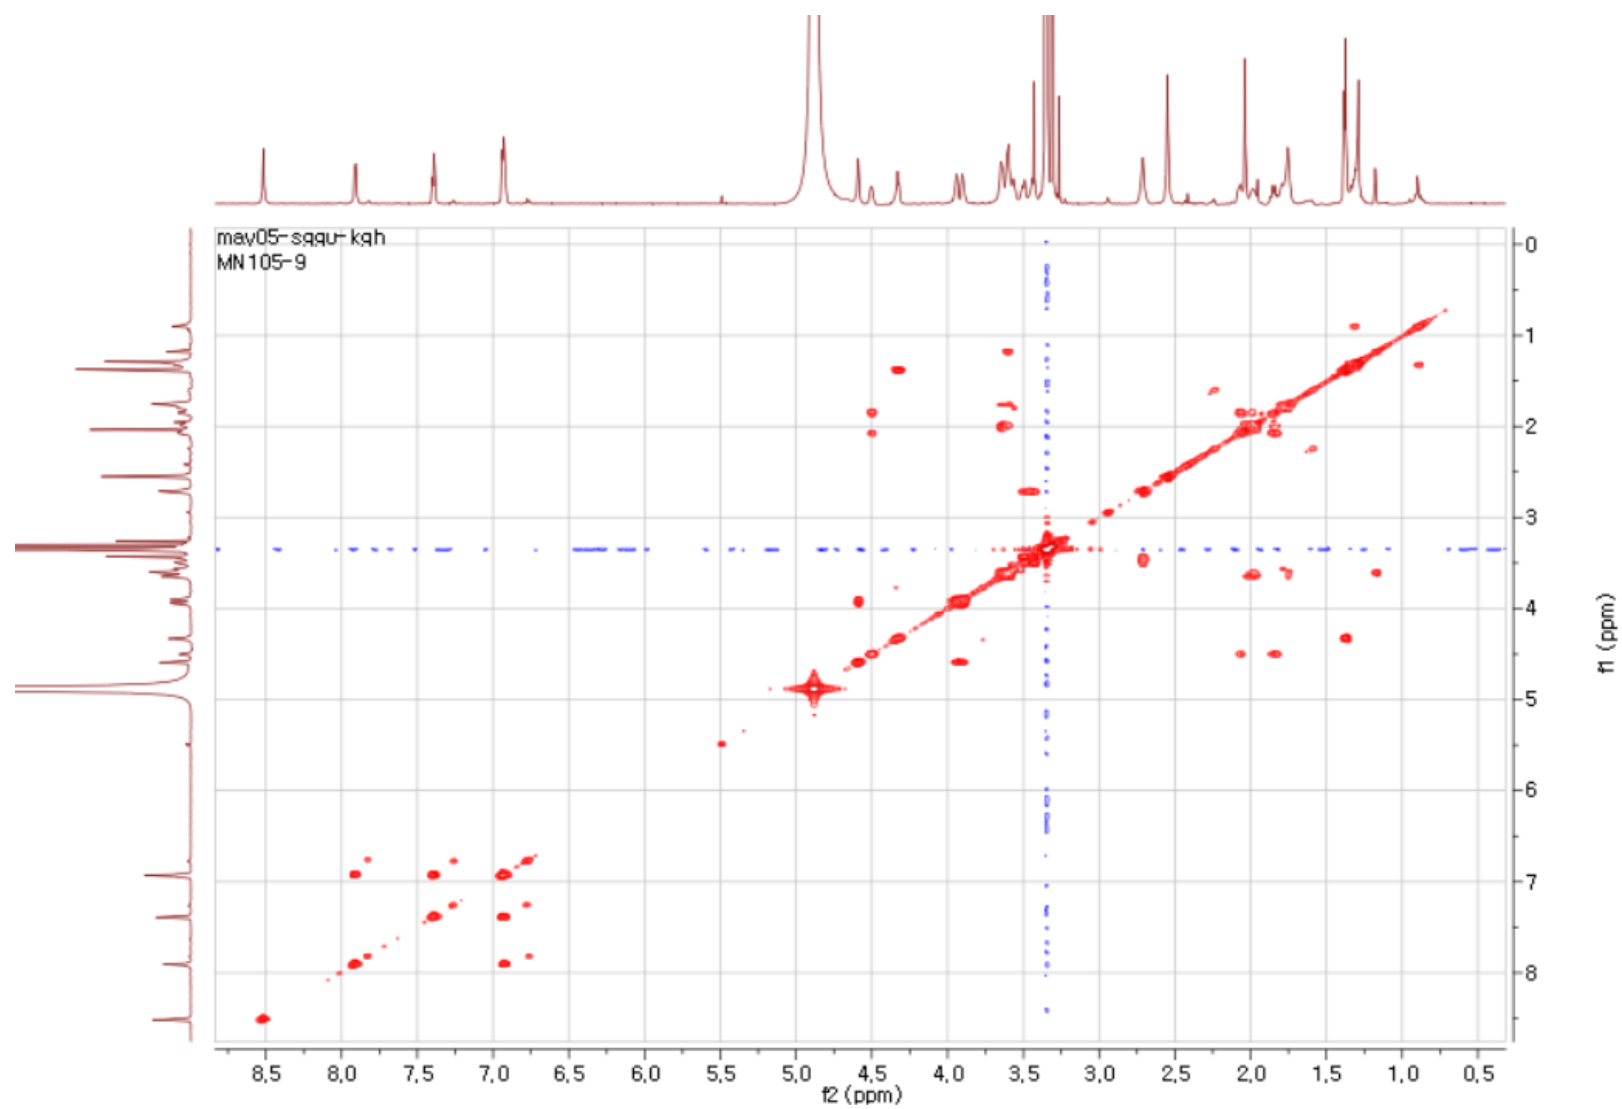

**Figure S24.**  $^1\text{H}$ - $^1\text{H}$  COSY spectrum of madurastatin A2 (**1**) ( $\text{CD}_3\text{OD}$ , 800 MHz)

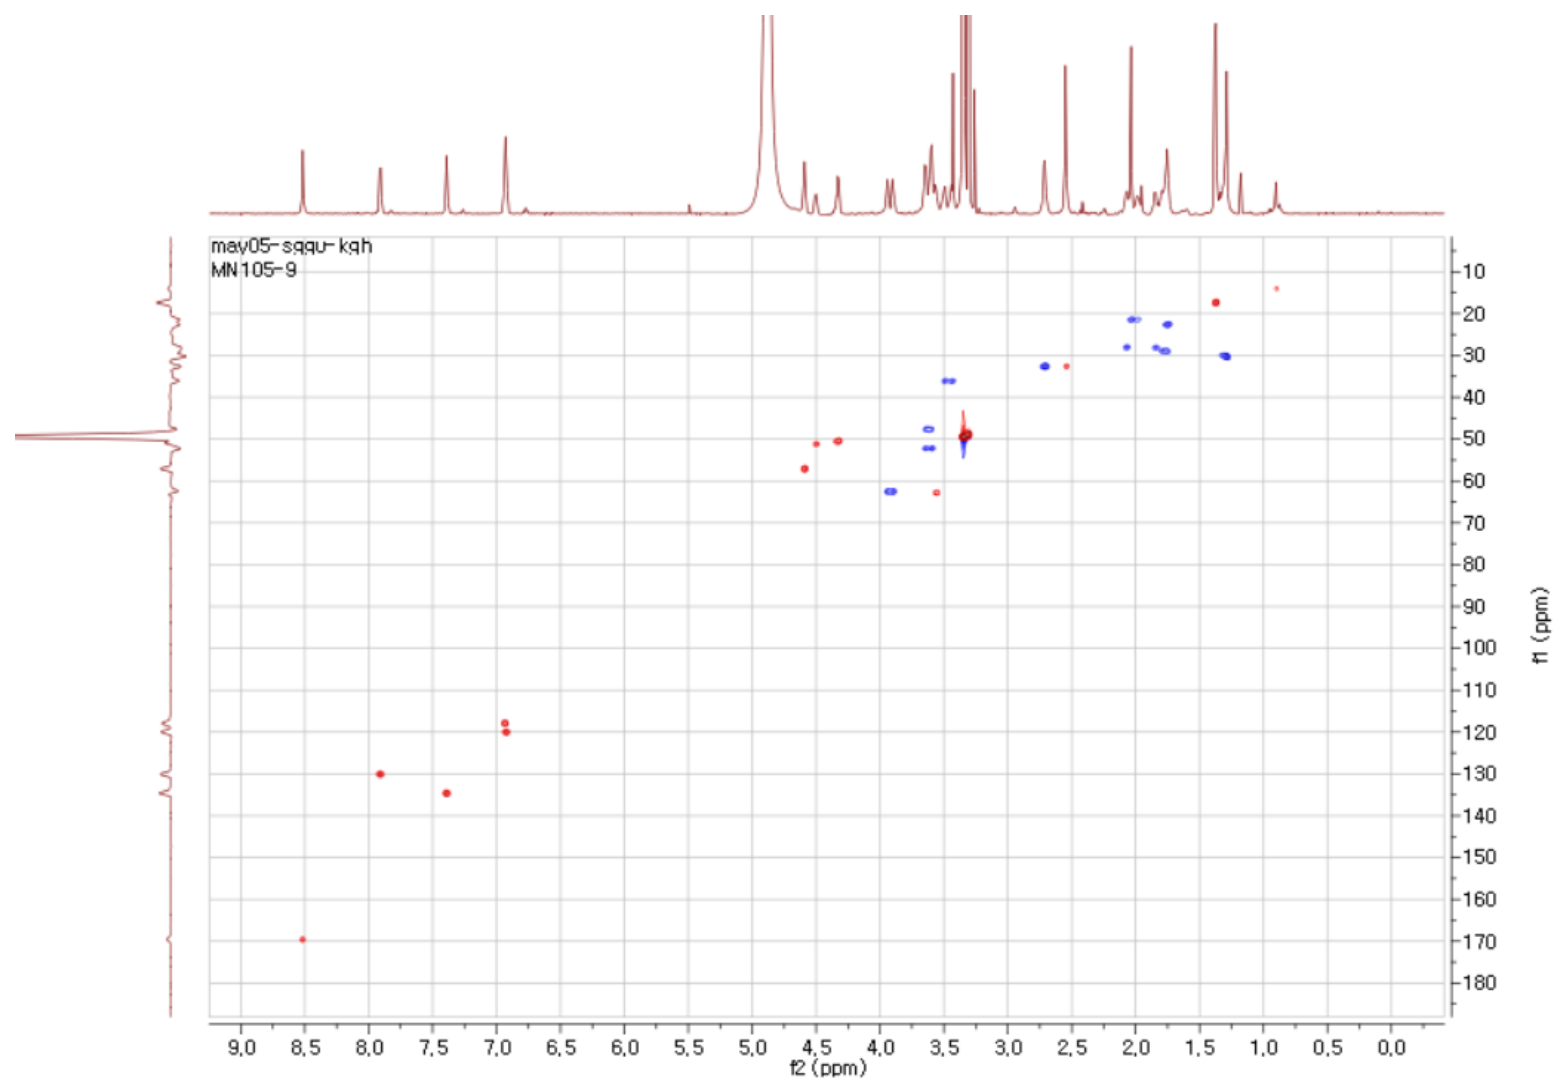

**Figure S25.** HSQC spectrum of madurastatin A2 (**1**) (CD<sub>3</sub>OD, 800 MHz)

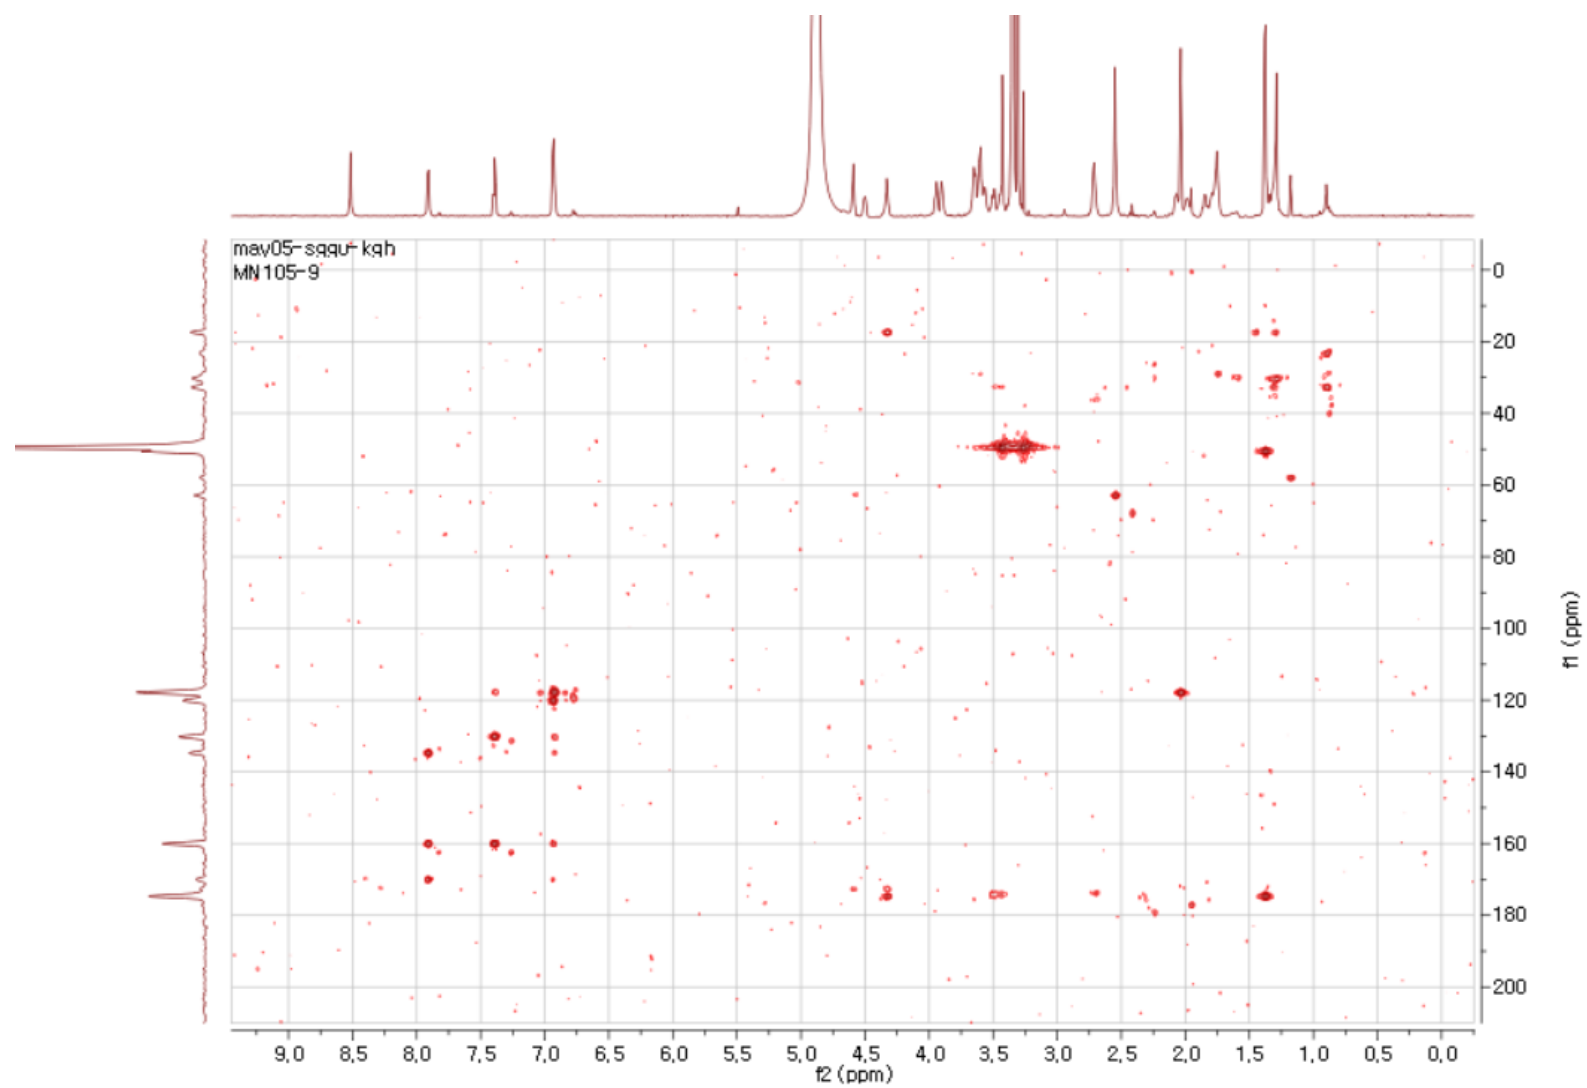

**Figure S26.** HMBC spectrum of madurastatin A2 (**1**) (CD<sub>3</sub>OD, 800 MHz)

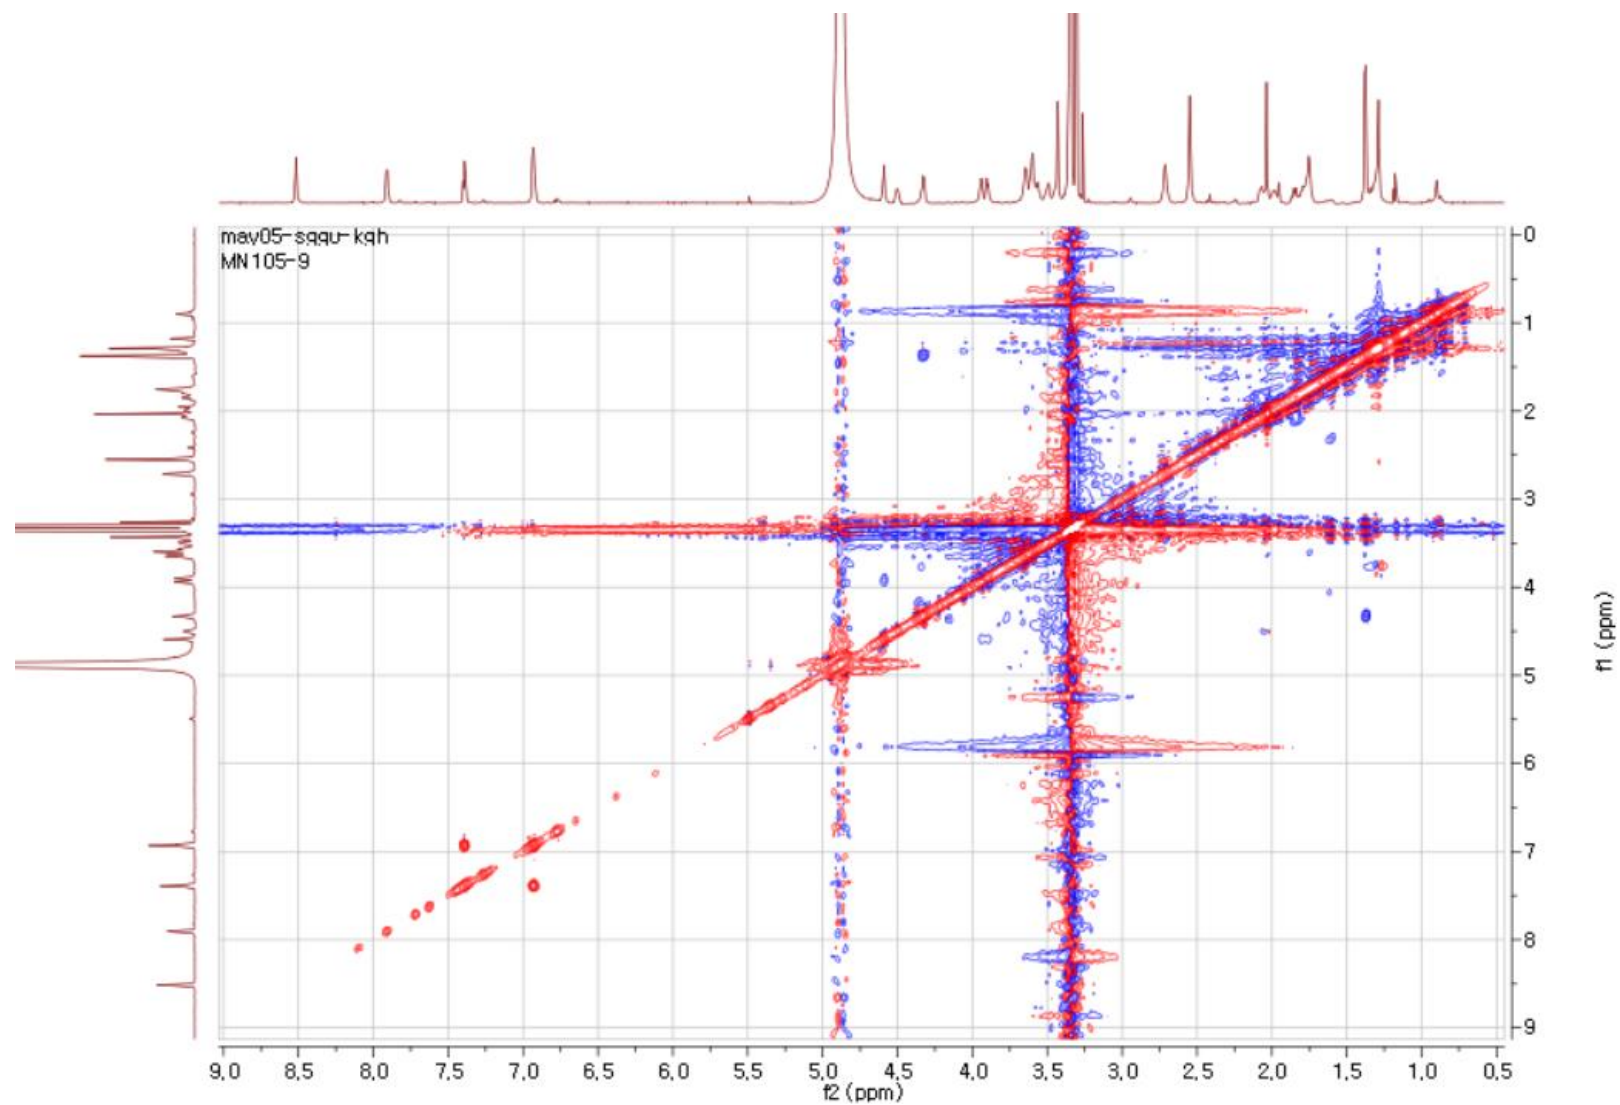

**Figure S27.** ROESY spectrum of madurastatin A2 (**1**) (CD<sub>3</sub>OD, 800 MHz)



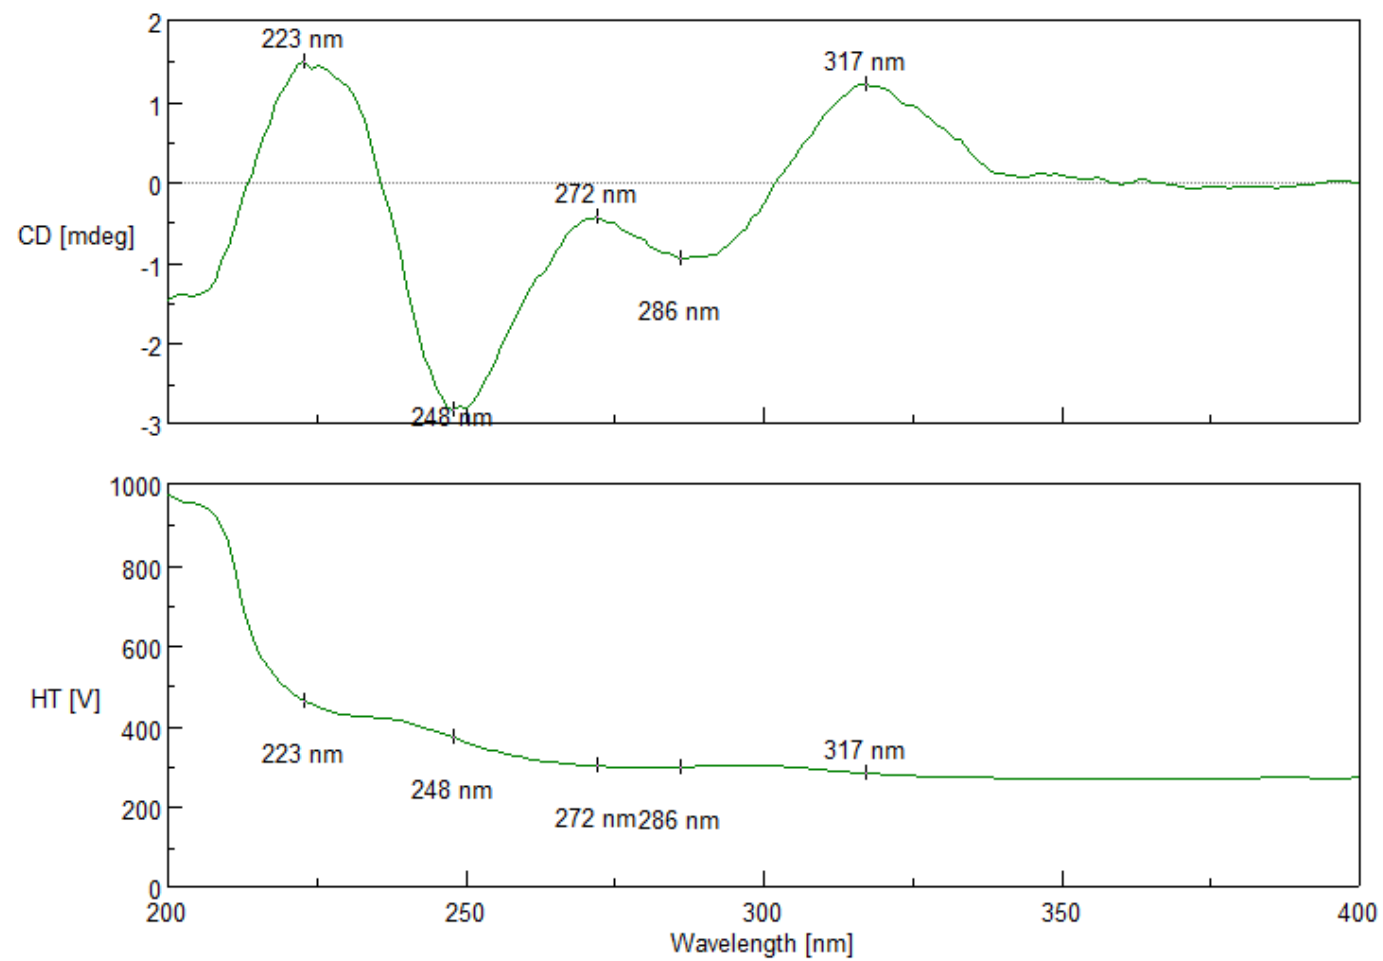

**Figure 28.** ECD spectrum of madurastatin A2 (1) (MeOH)

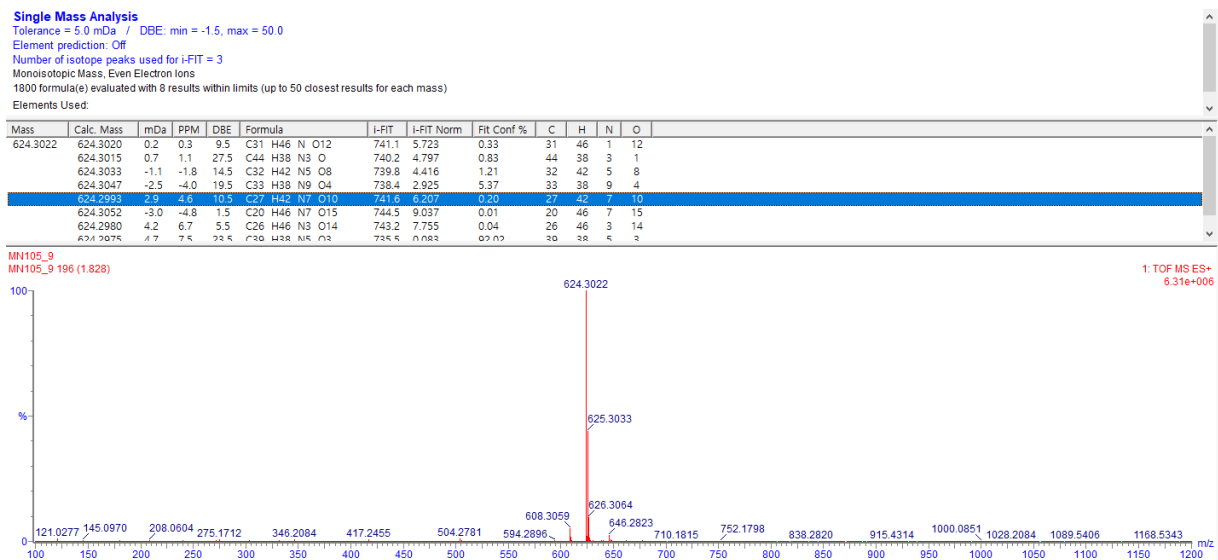

**Figure S29.** HR-ESIMS spectrum of madurastatin A2 (1)

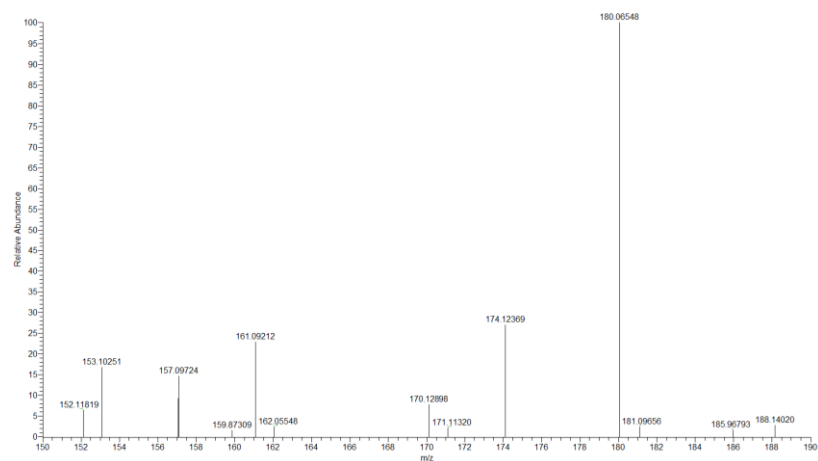

**Figure S30.** Partial MS<sup>2</sup>-spectrum of **1** showing the presence of diagnostic key fragment  $m/z$  161.09212 and absence of key fragment  $m/z$  177.08647.

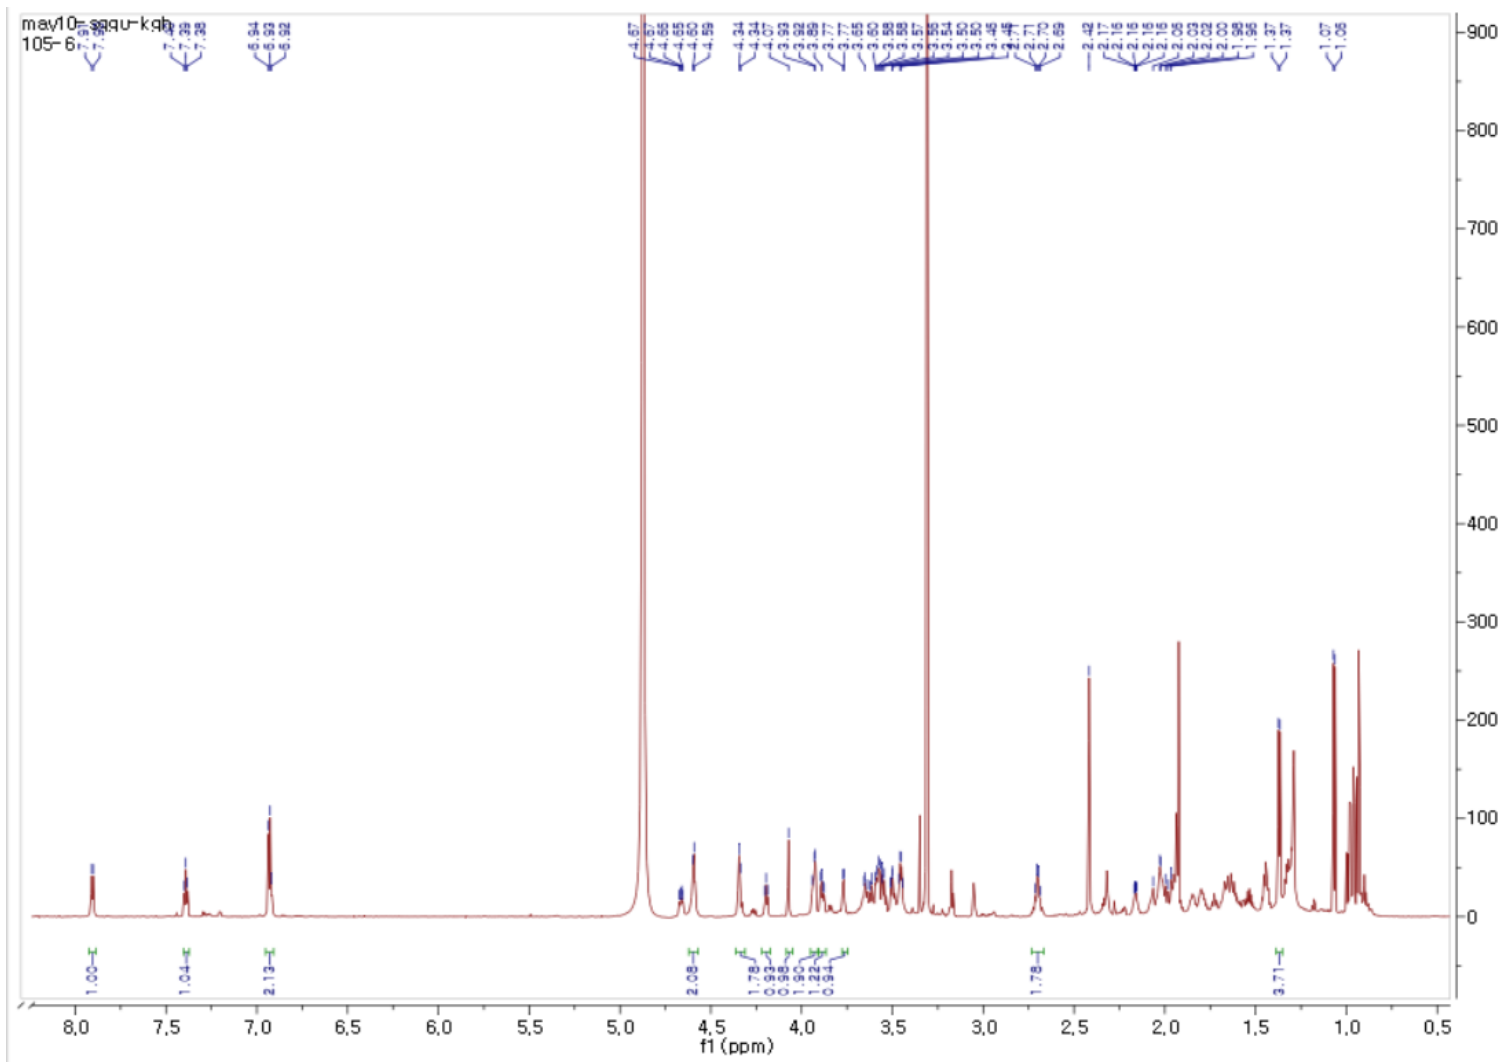

Figure S31. <sup>1</sup>H NMR spectrum of madurastatin E1 (2) (CD<sub>3</sub>OD, 800 MHz)

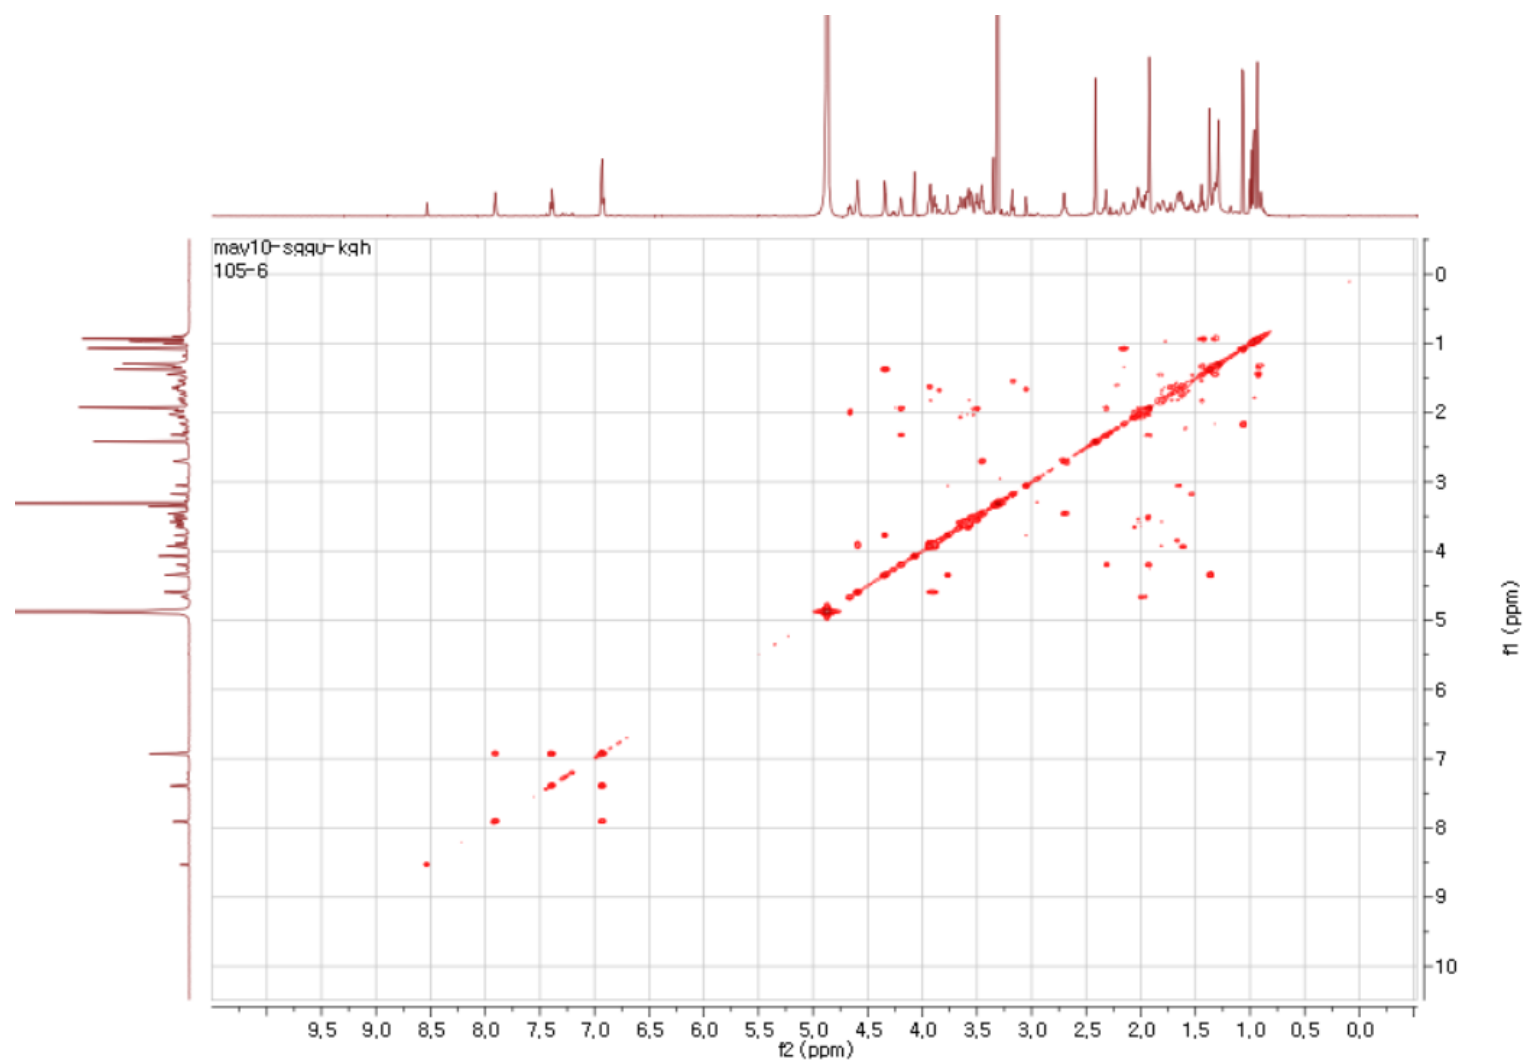

**Figure S32.**  $^1\text{H}$ - $^1\text{H}$  COSY spectrum of madurastatin E1 (**2**) ( $\text{CD}_3\text{OD}$ , 800 MHz)

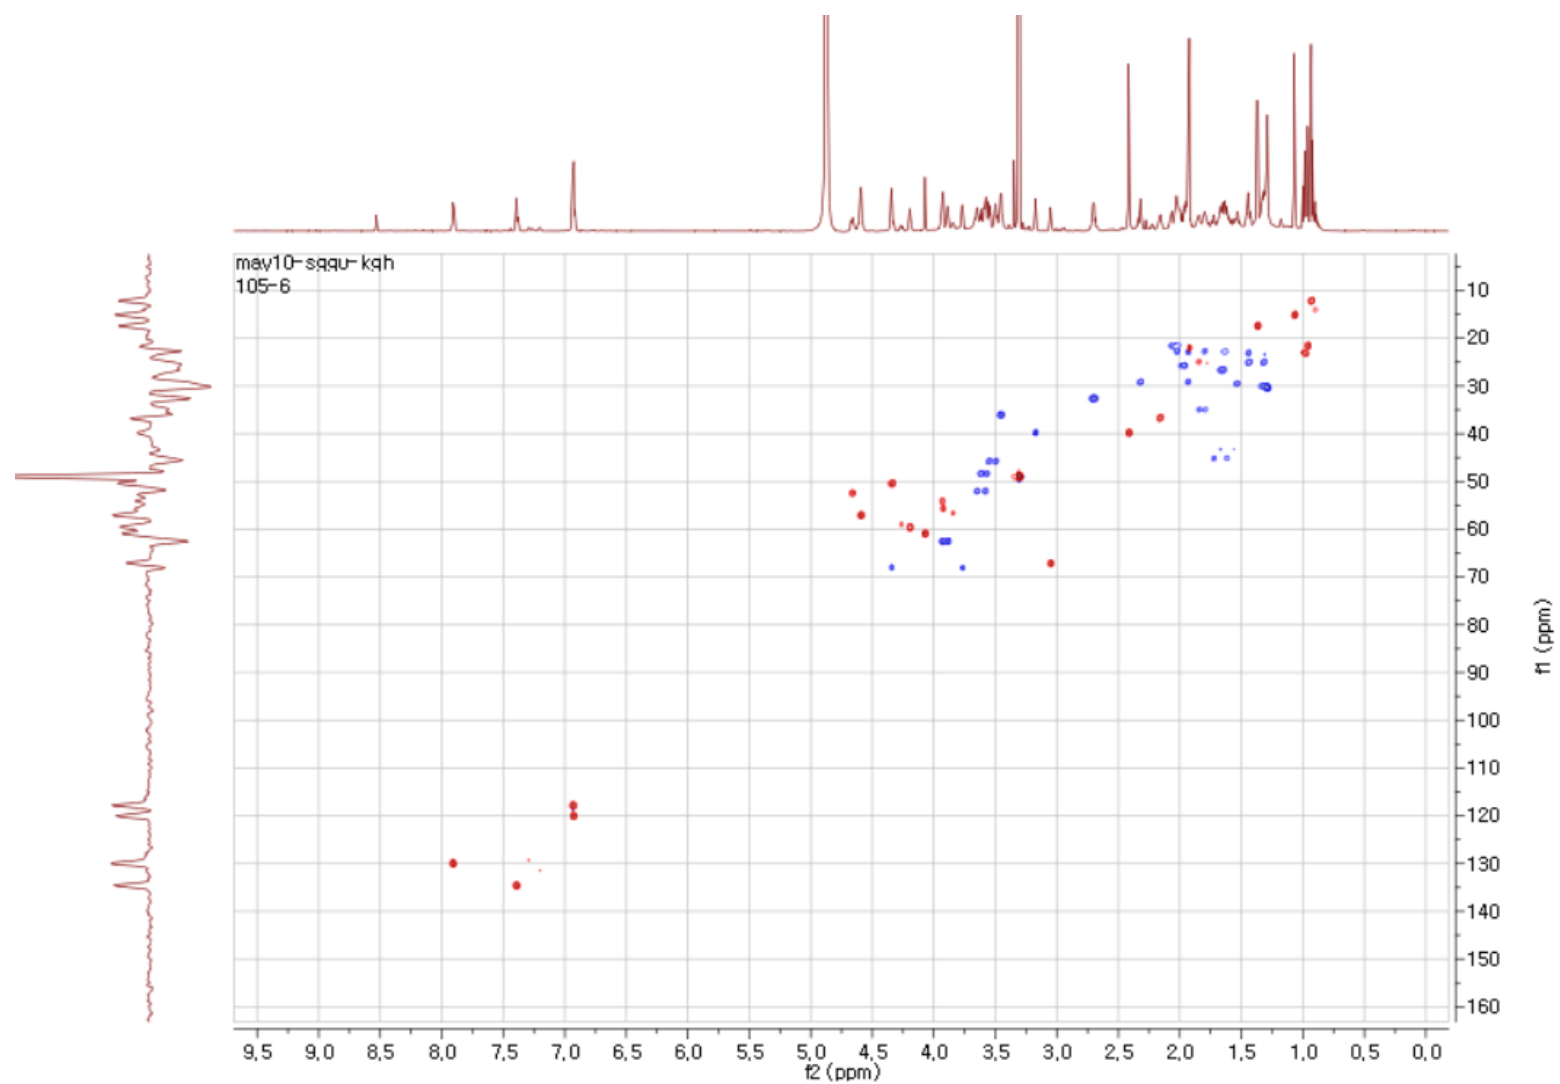

**Figure S33.** HSQC spectrum of madurastatin E1 (2) ( $\text{CD}_3\text{OD}$ , 800 MHz)

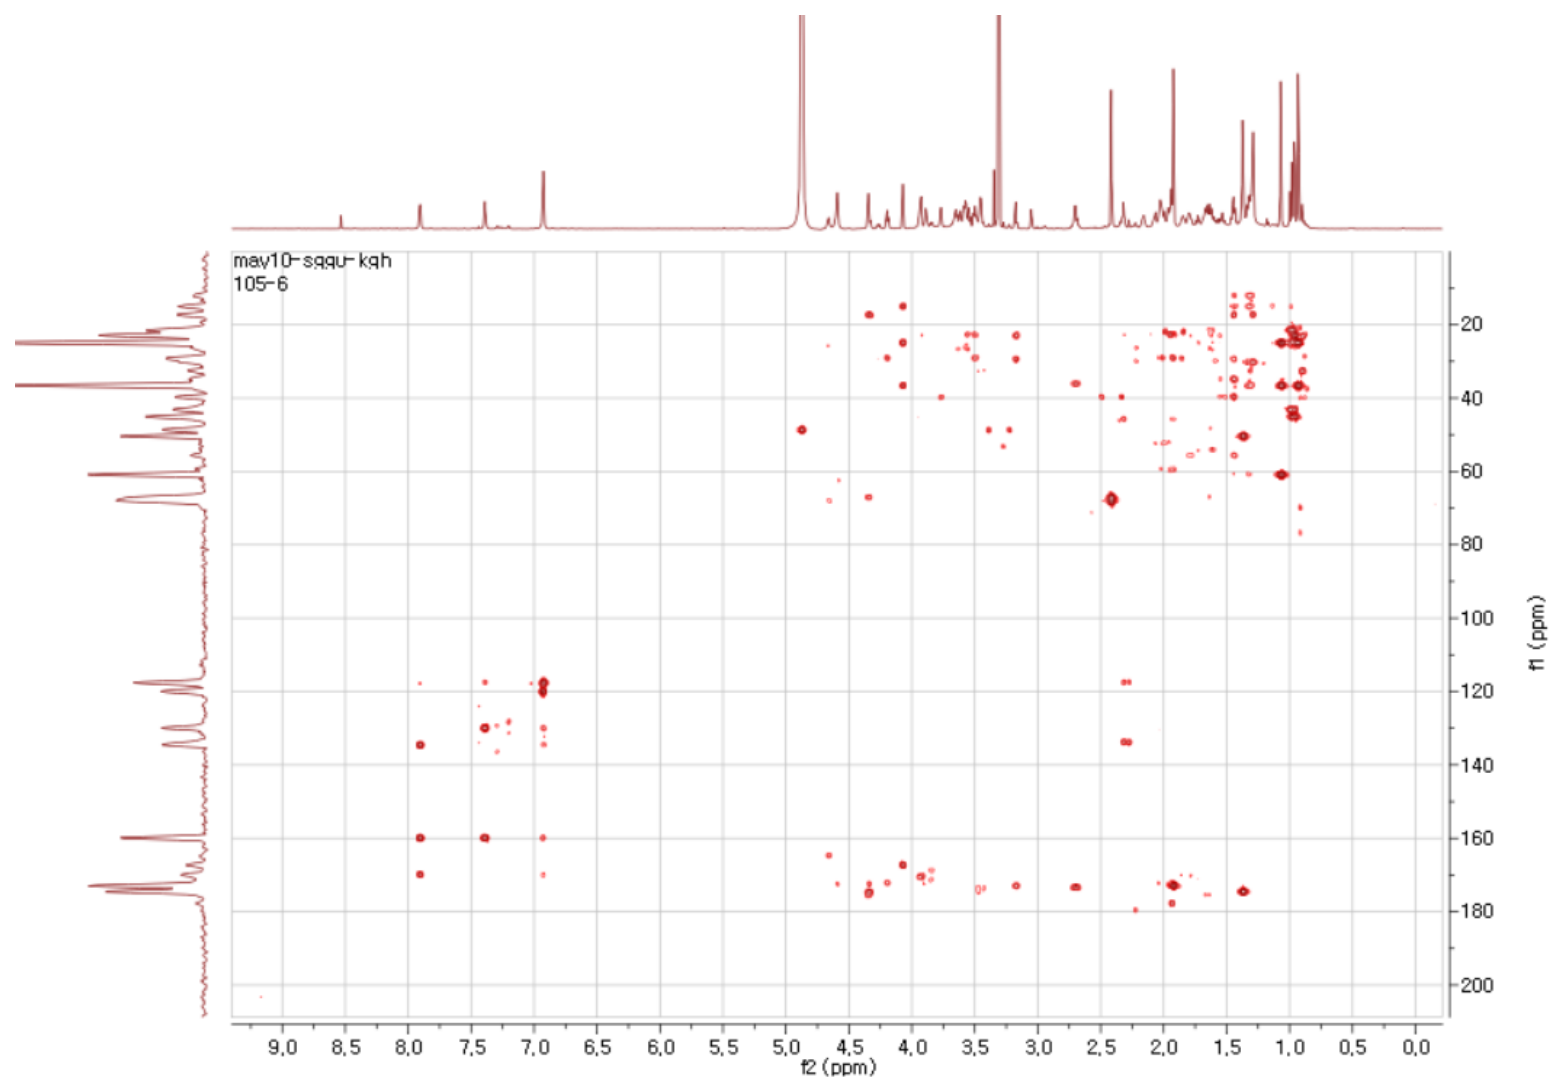

**Figure S34.** HMBC spectrum of madurastatin E1 (**2**) ( $\text{CD}_3\text{OD}$ , 800 MHz)

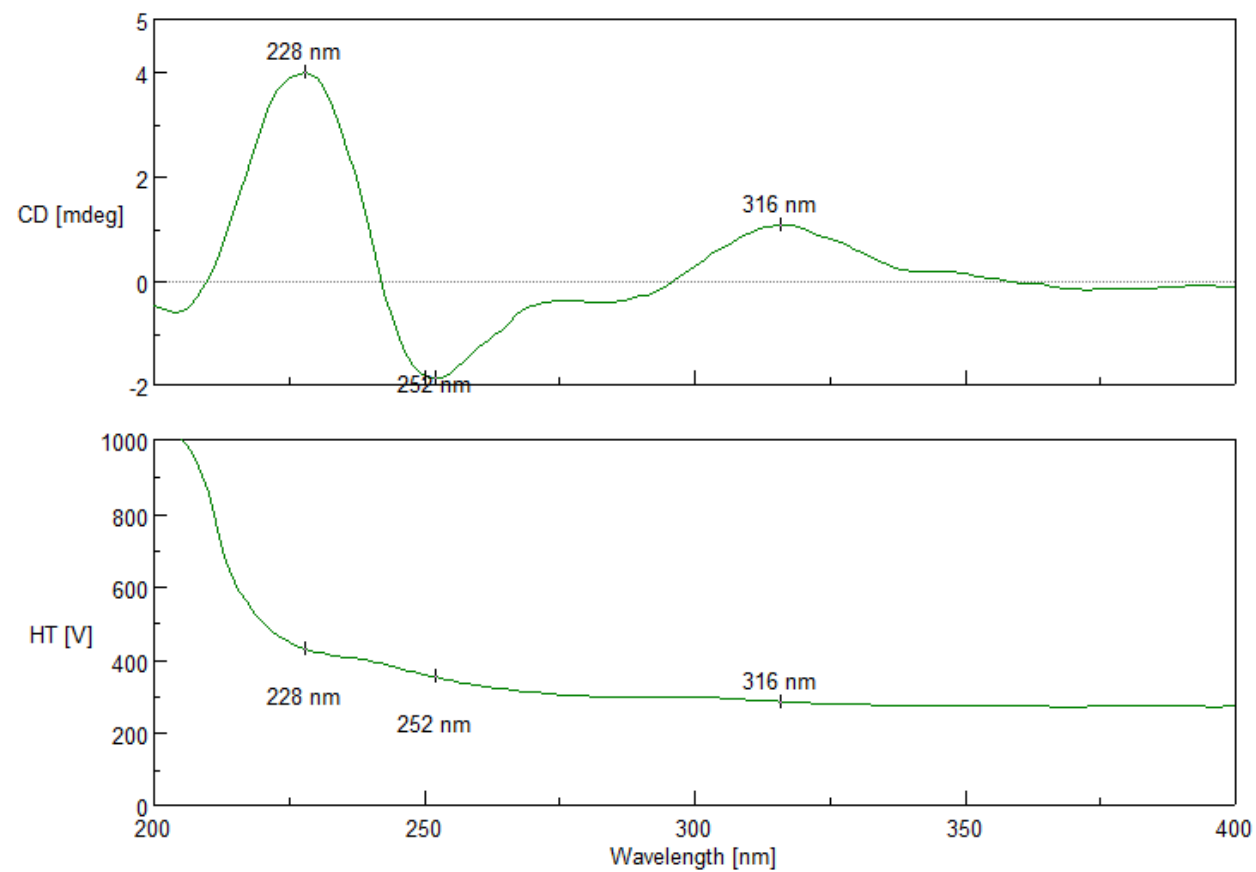

**Figure S35.** ECD spectrum of madurastatin E1 (**2**) (MeOH)

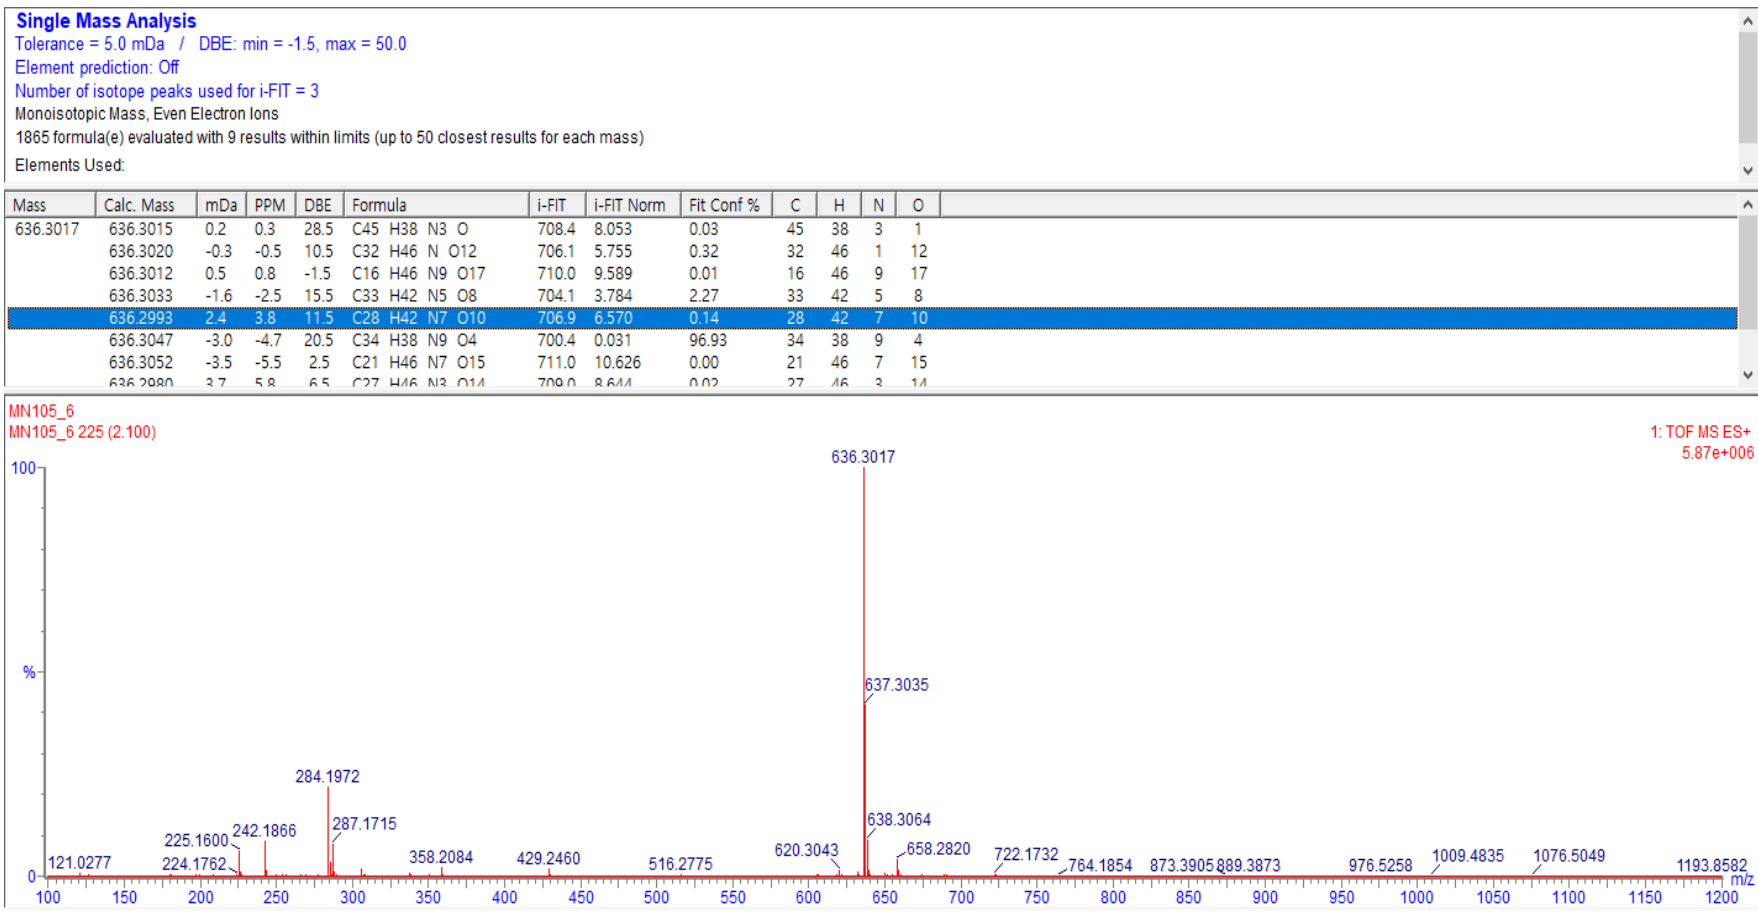

**Figure S36.** HR-ESIMS spectrum of madurastatin E1 (2)



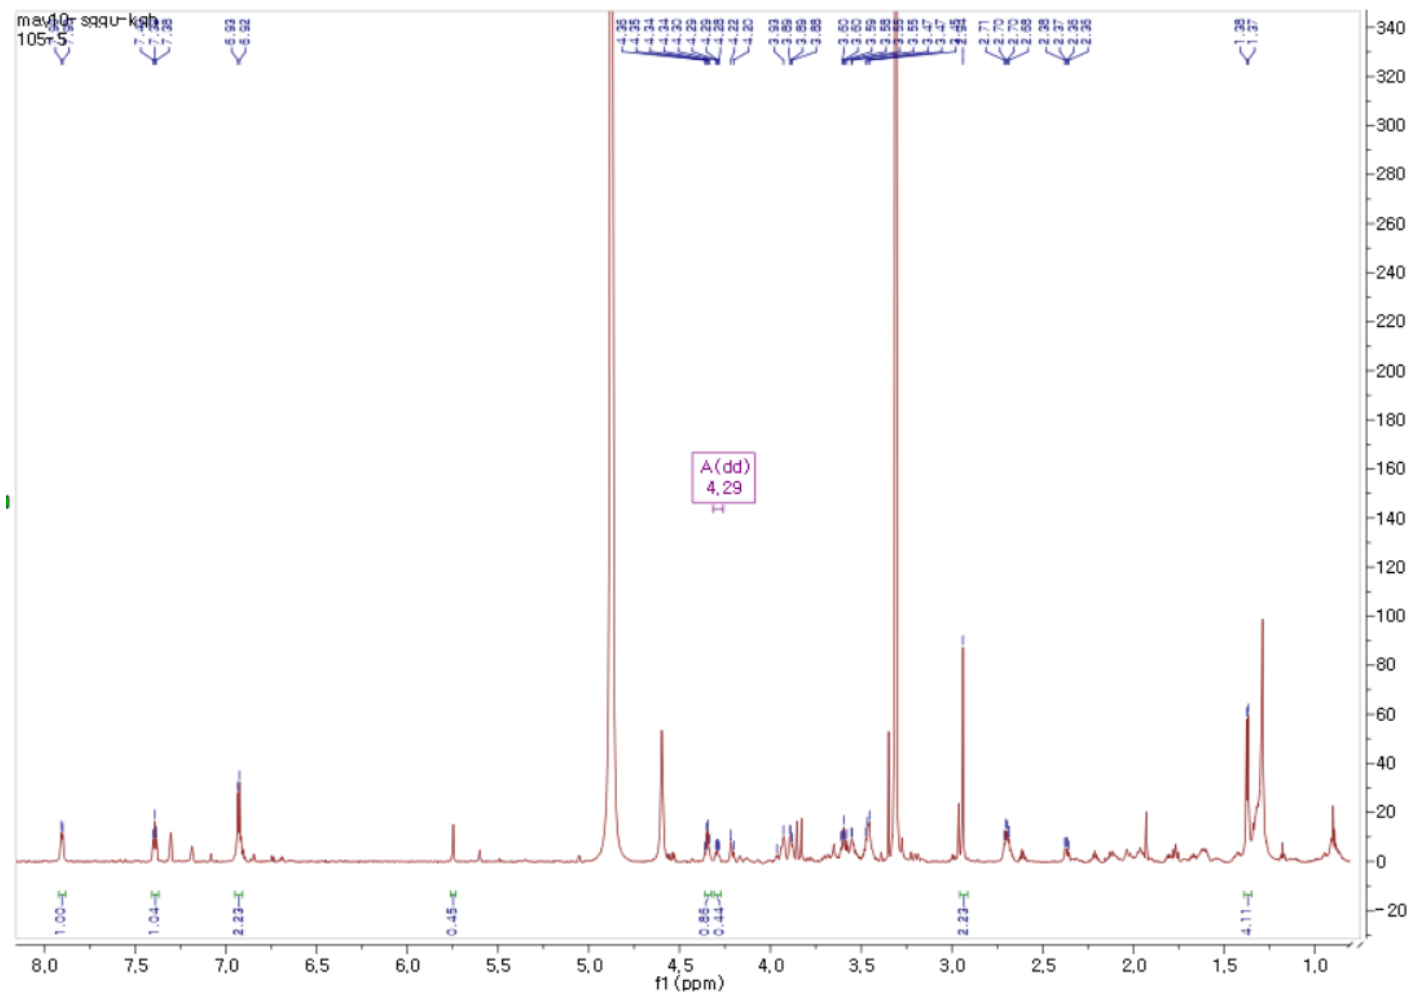

**Figure S37.**  $^1\text{H}$  NMR spectrum of madurastatin F1 (**3**) ( $\text{CD}_3\text{OD}$ , 800 MHz)

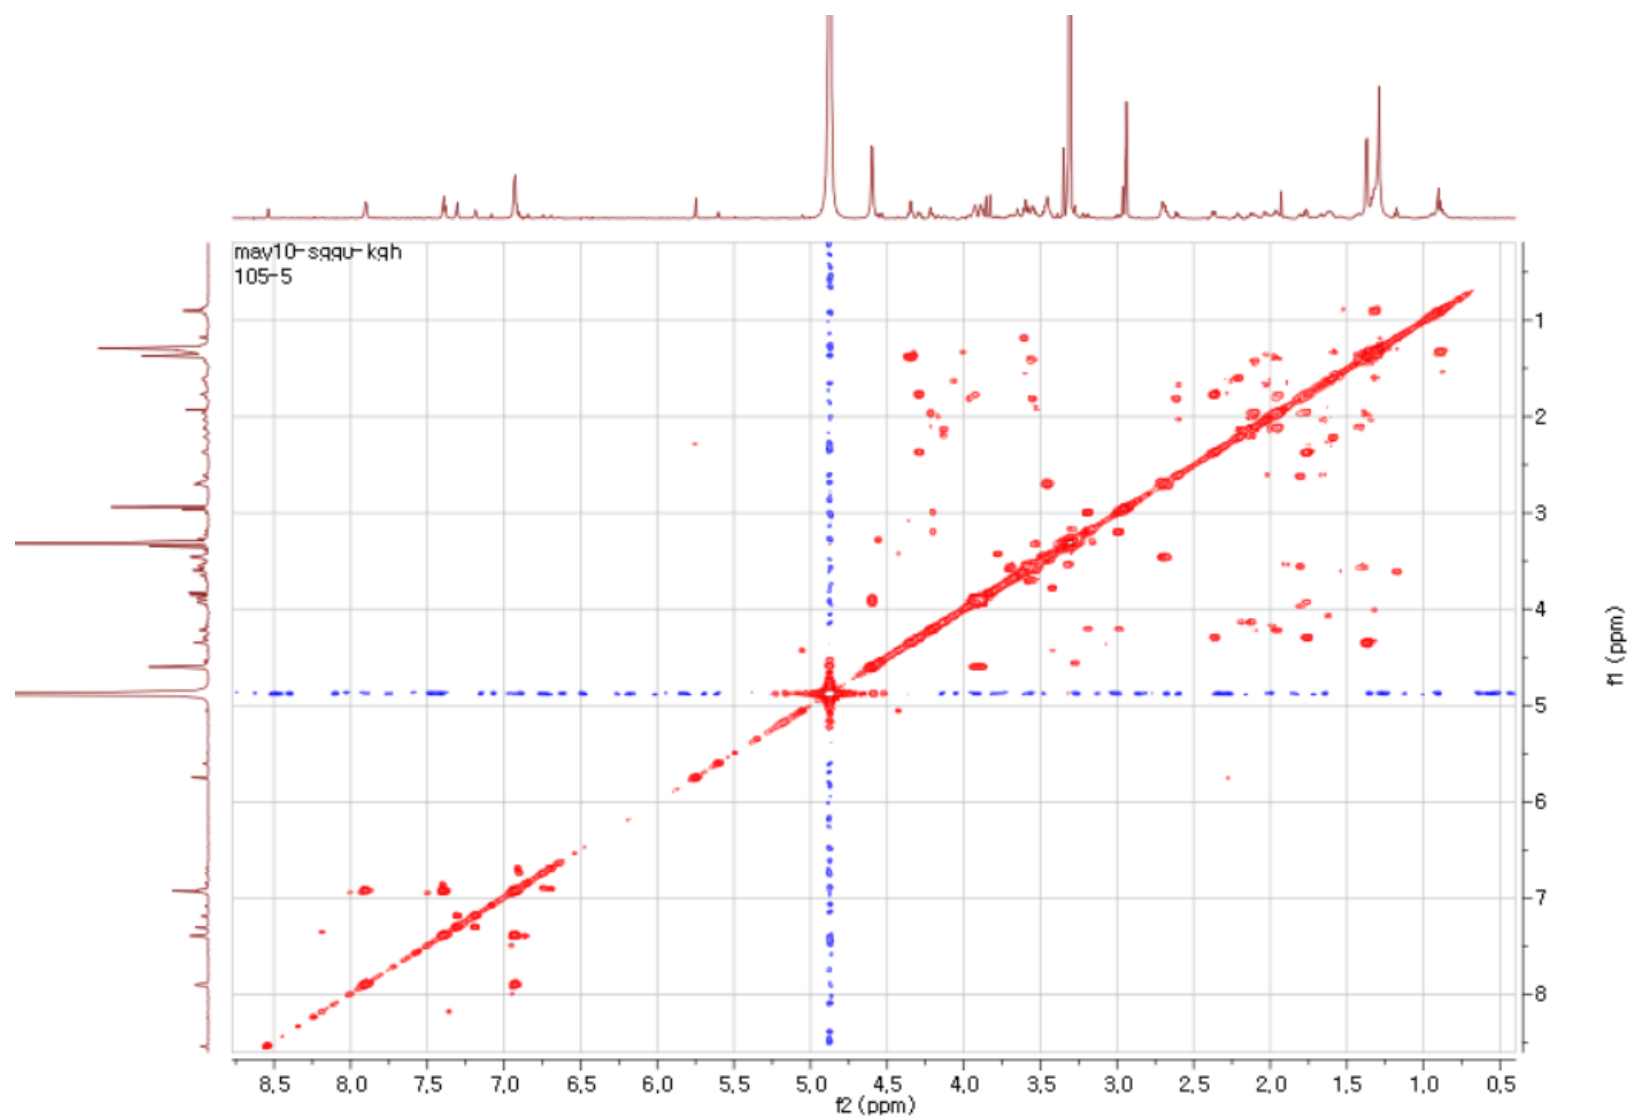

**Figure S38.**  $^1\text{H}$ - $^1\text{H}$  COSY spectrum of madurastatin F1 (**3**) ( $\text{CD}_3\text{OD}$ , 800 MHz)

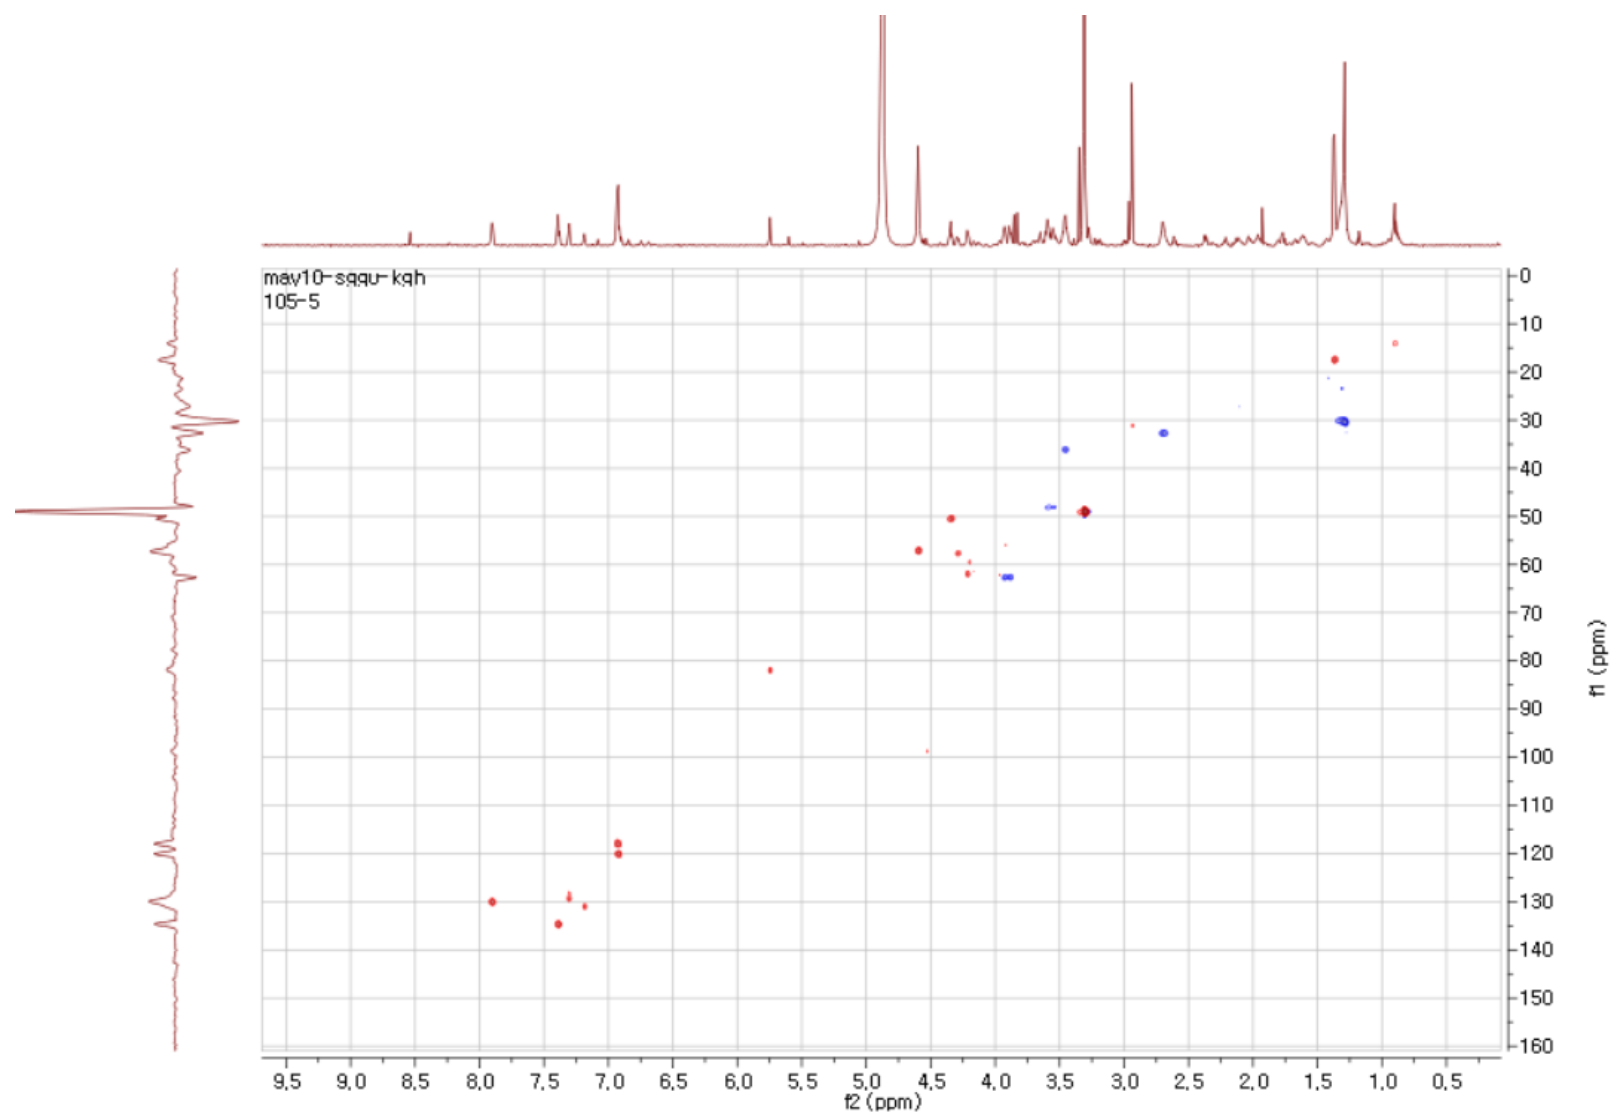

**Figure S39.** HSQC spectrum of madurastatin F1 (**3**) (CD<sub>3</sub>OD, 800 MHz)

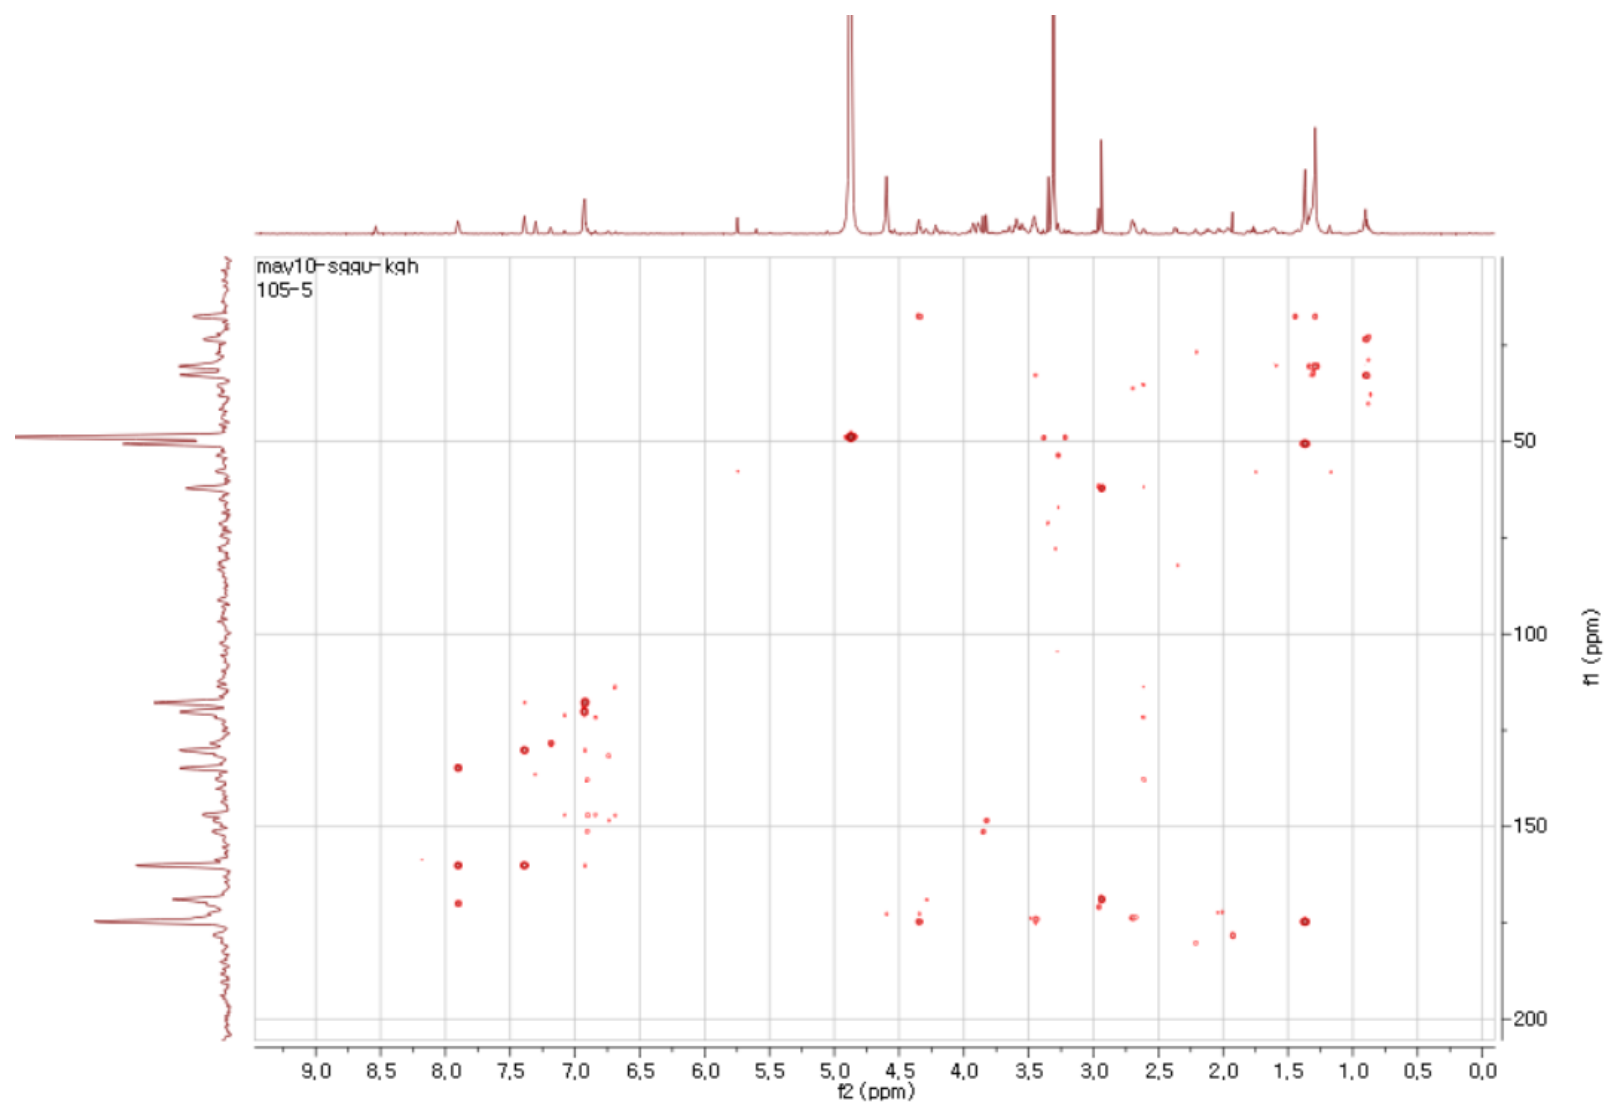

**Figure S40.** HMBC spectrum of madurastatin F1 (**3**) (CD<sub>3</sub>OD, 800 MHz)

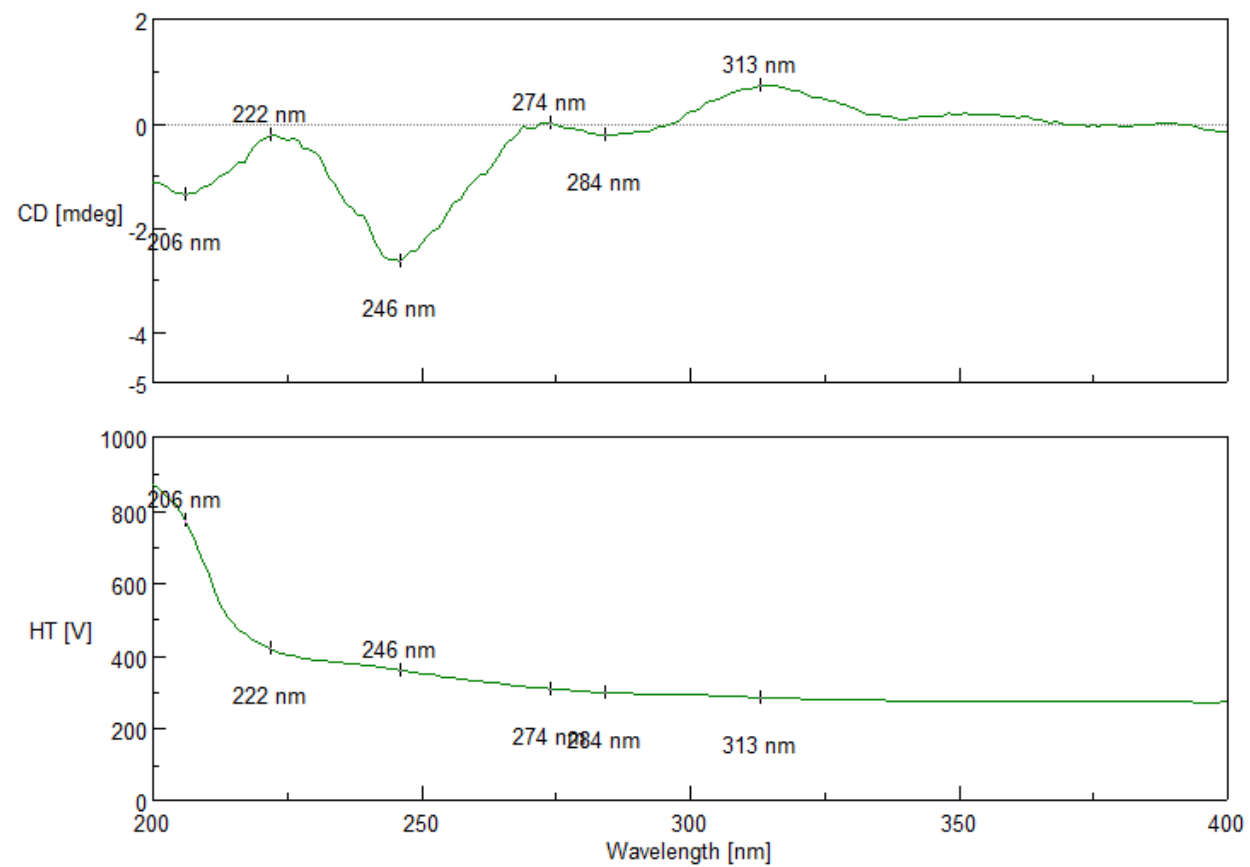

**Figure S41.** ECD spectrum of madurastatin F1 (**3**) (MeOH).

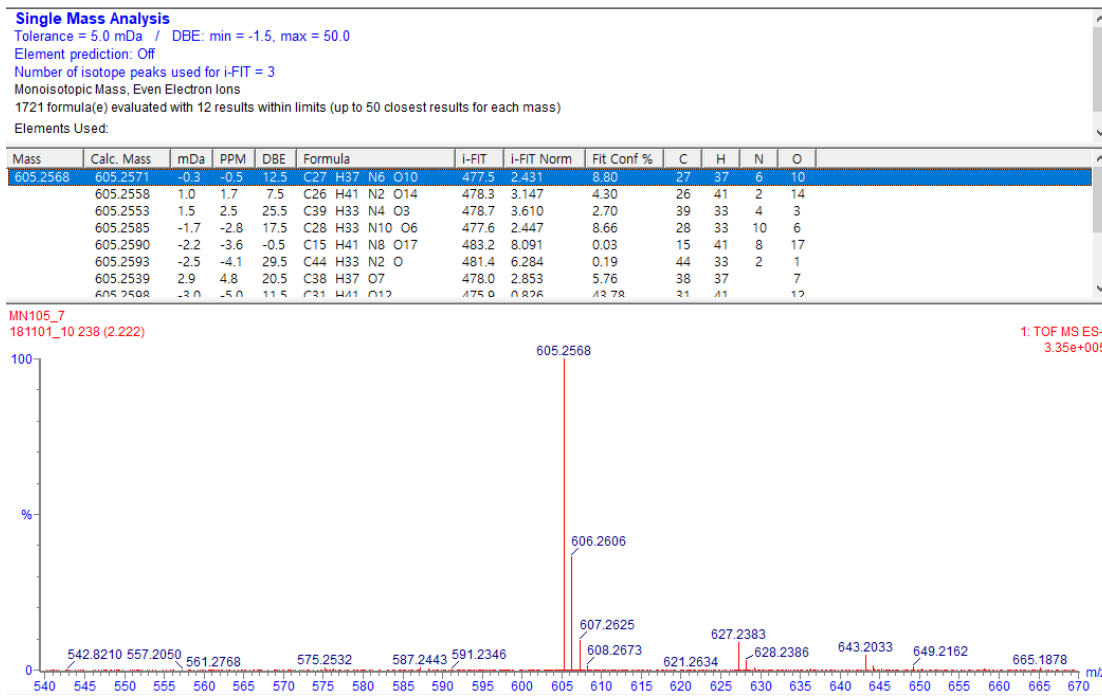

**Figure S42. HR-ESIMS spectrum of madurastatin F1 (3)**

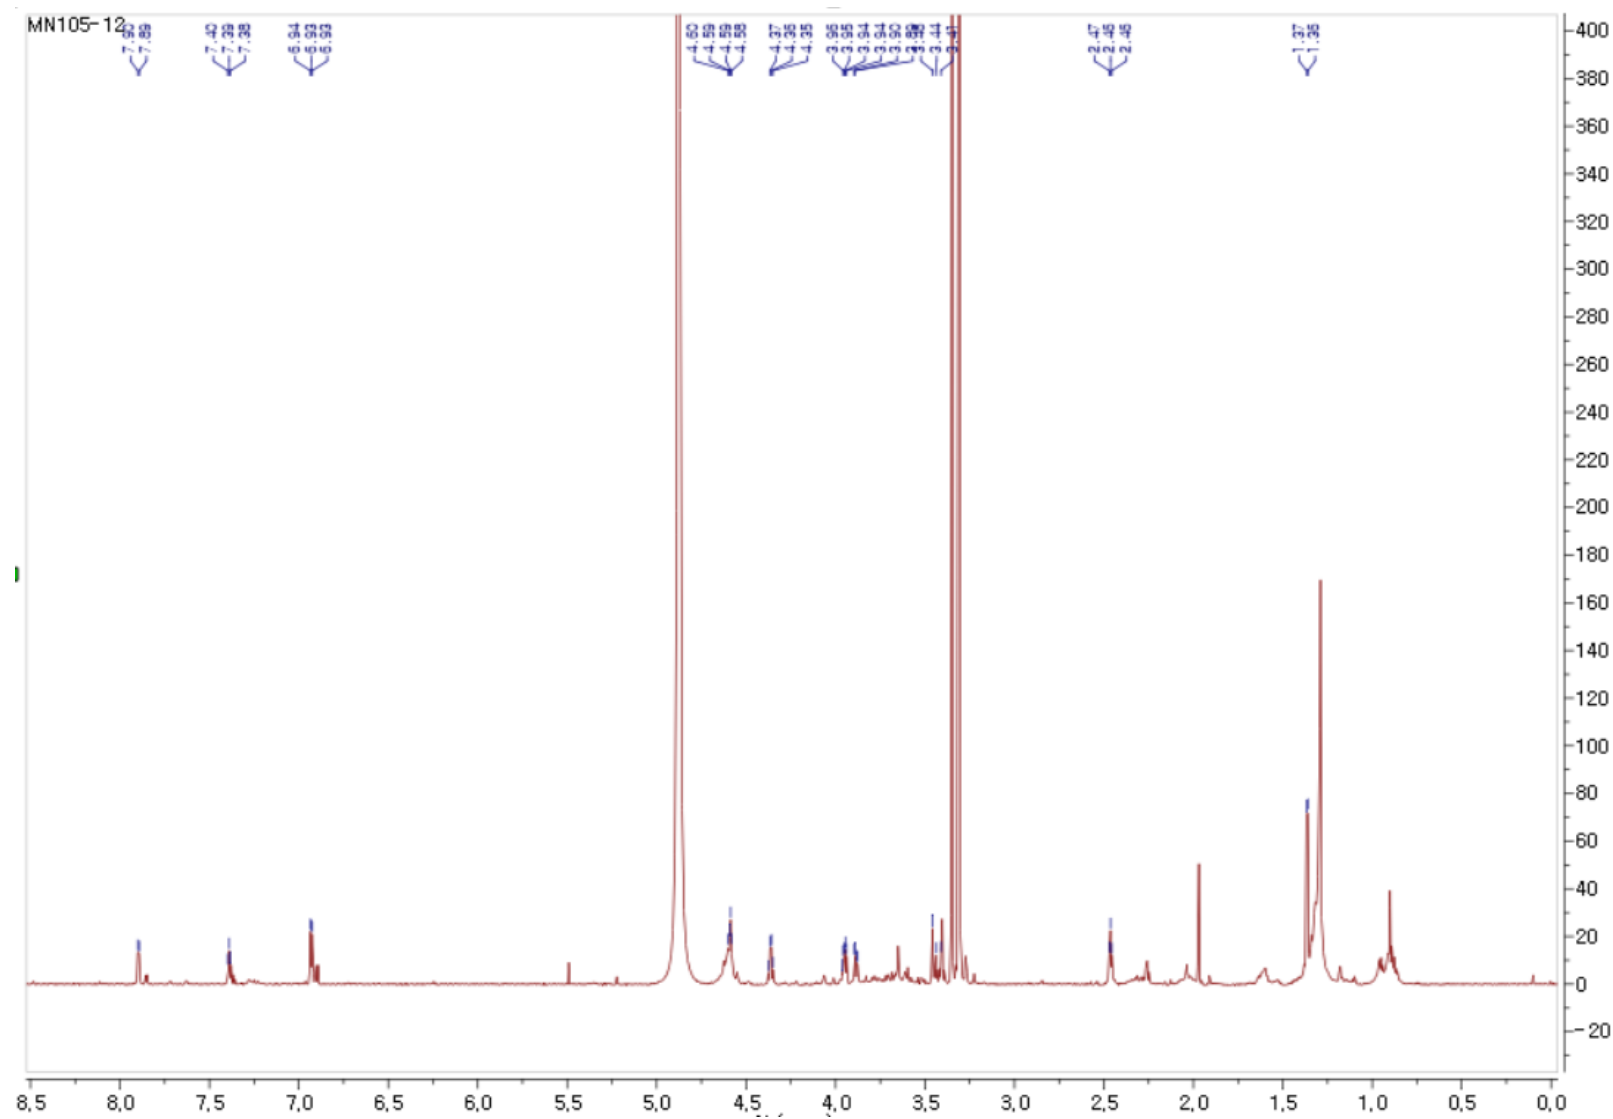

**Figure S43.**  $^1\text{H}$  NMR spectrum of madurastatin G1 (**4**) ( $\text{CD}_3\text{OD}$ , 800 MHz)

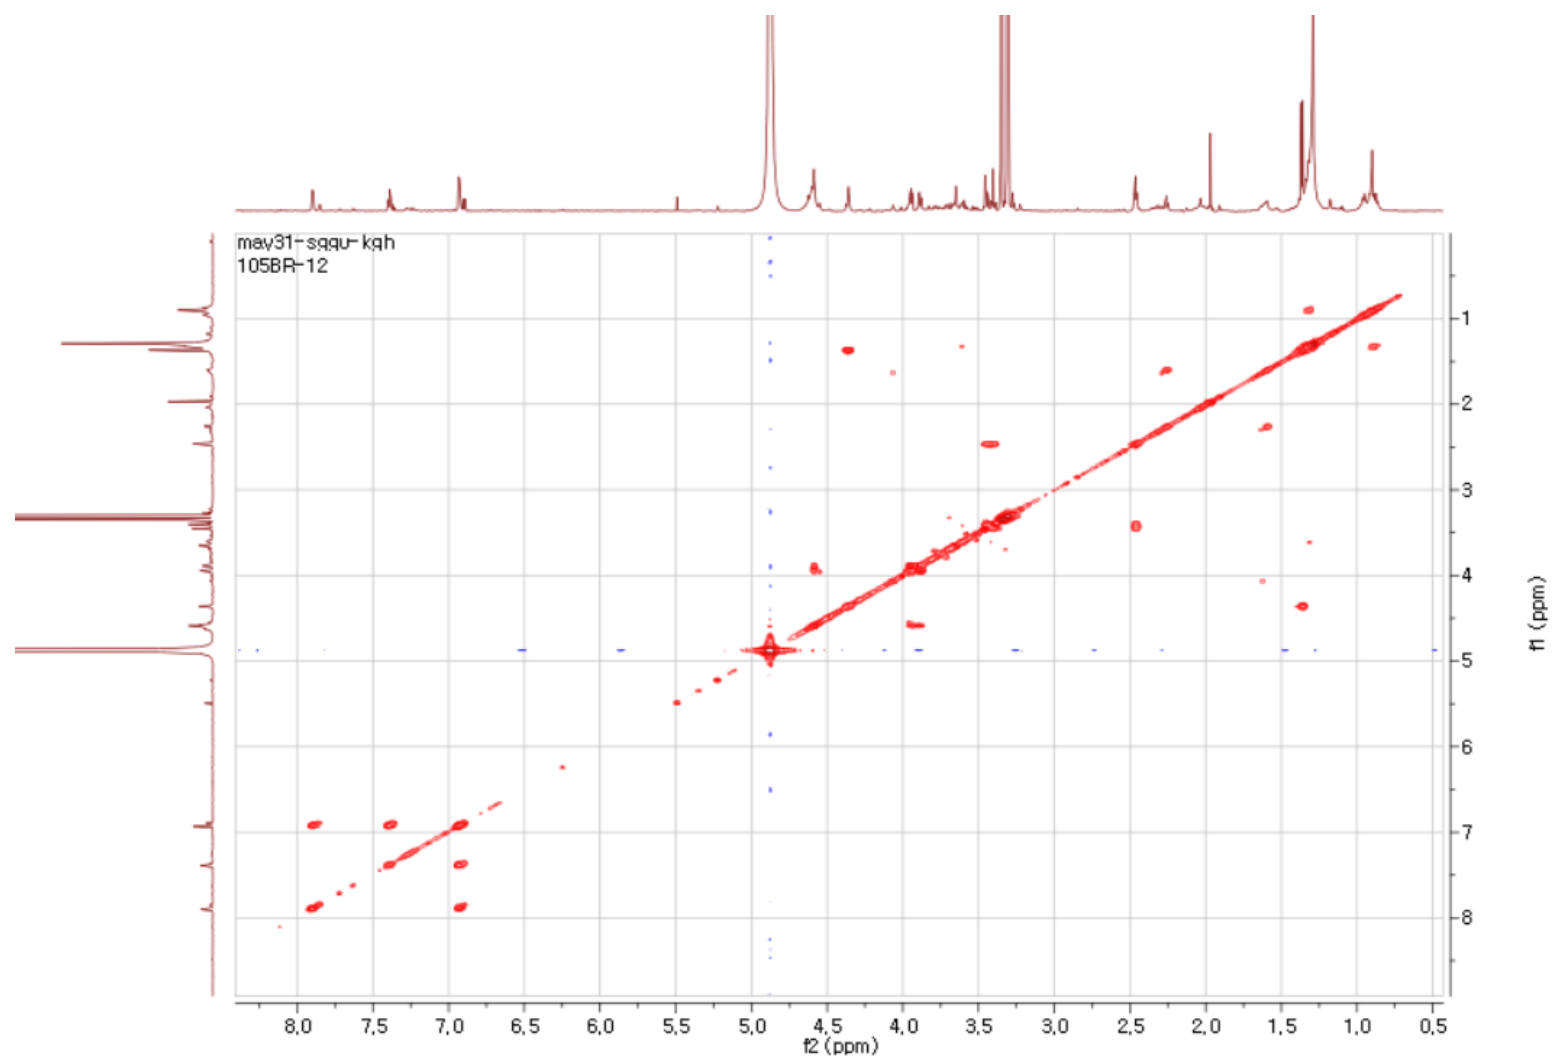

**Figure S44.**  $^1\text{H}$ - $^1\text{H}$  COSY spectrum of madurastatin G1 (**4**) ( $\text{CD}_3\text{OD}$ , 800 MHz)



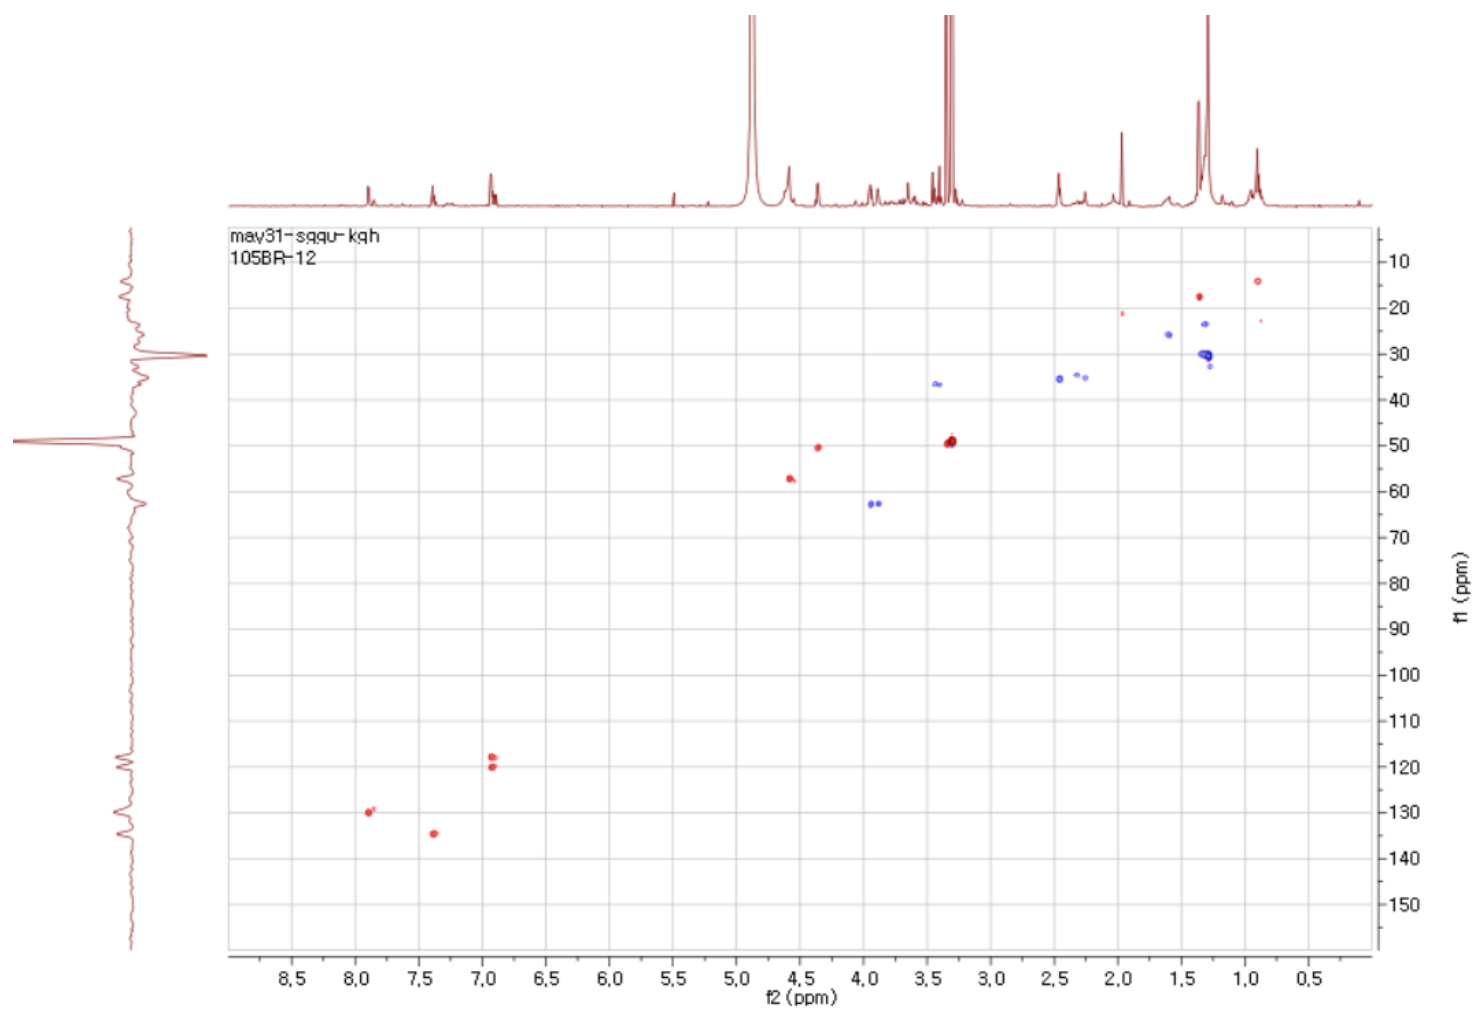

**Figure S45.** HSQC spectrum of madurastatin G1 (**4**) (CD<sub>3</sub>OD, 800 MHz)

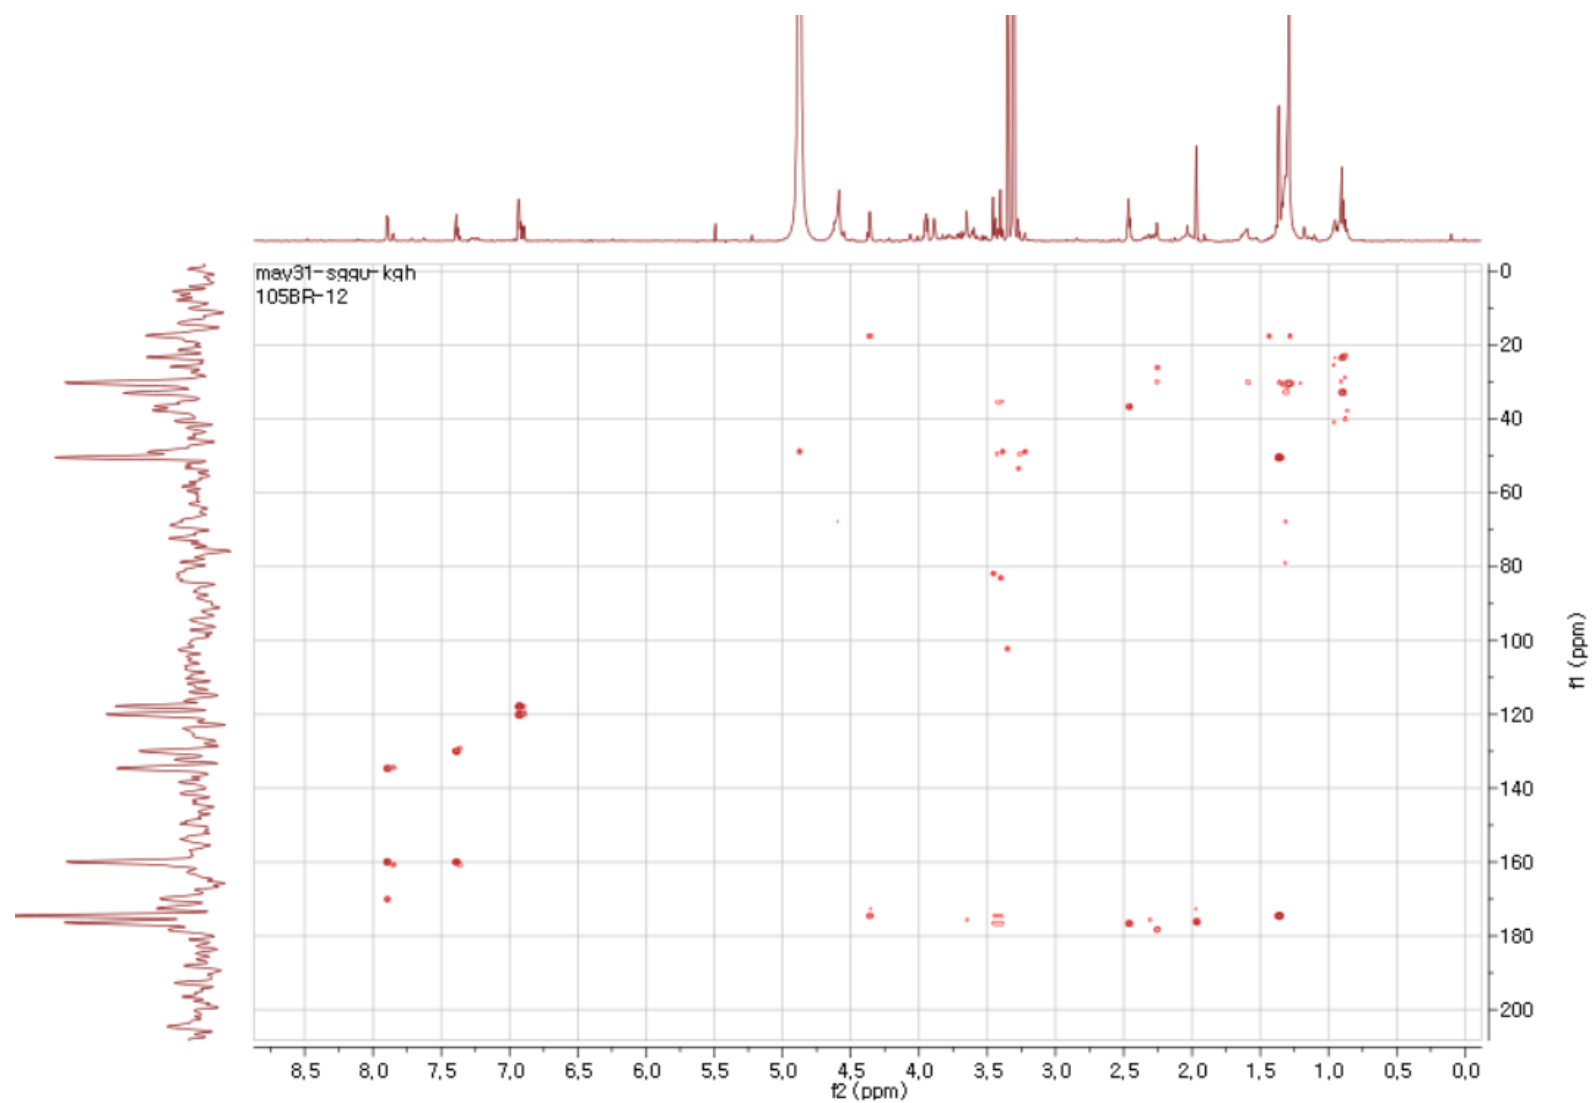

**Figure S46.** HMBC spectrum of madurastatin G1 (**4**) (CD<sub>3</sub>OD, 800 MHz)

### Single Mass Analysis

Tolerance = 5.0 mDa / DBE: min = -1.5, max = 50.0

Element prediction: Off

Number of isotope peaks used for i-FIT = 3

Monoisotopic Mass, Even Electron Ions

663 formula(e) evaluated with 8 results within limits (up to 50 closest results for each mass)

Elements Used:

| Mass     | Calc. Mass | mDa  | PPM   | DBE  | Formula       | i-FIT | i-FIT Norm | Fit Conf % | C  | H  | N | O  |
|----------|------------|------|-------|------|---------------|-------|------------|------------|----|----|---|----|
| 368.1451 | 368.1458   | -0.7 | -1.9  | 7.5  | C16 H22 N3 O7 | 583.1 | 0.543      | 58.11      | 16 | 22 | 3 | 7  |
| 368.1439 | 368.1439   | 1.2  | 3.3   | 20.5 | C28 H18 N     | 595.1 | 12.571     | 0.00       | 28 | 18 | 1 |    |
| 368.1471 | 368.1471   | -2.0 | -5.4  | 12.5 | C17 H18 N7 O3 | 587.1 | 4.585      | 1.02       | 17 | 18 | 7 | 3  |
| 368.1431 | 368.1431   | 2.0  | 5.4   | 8.5  | C12 H18 N9 O5 | 583.5 | 0.942      | 38.99      | 12 | 18 | 9 | 5  |
| 368.1418 | 368.1418   | 3.3  | 9.0   | 3.5  | C11 H22 N5 O9 | 586.5 | 4.003      | 1.83       | 11 | 22 | 5 | 9  |
| 368.1490 | 368.1490   | -3.9 | -10.6 | -0.5 | C5 H22 N9 O10 | 592.0 | 9.507      | 0.01       | 5  | 22 | 9 | 10 |
| 368.1498 | 368.1498   | -4.7 | -12.8 | 11.5 | C21 H22 N O5  | 591.9 | 9.344      | 0.01       | 21 | 22 | 1 | 5  |
| 368.1404 | 368.1404   | 4.7  | 12.8  | -1.5 | C10 H26 N O13 | 590.2 | 7.735      | 0.04       | 10 | 26 | 1 | 13 |

MN105\_12

MN105\_12 232 (2.161)

1: TOF MS ES+  
5.79e+005

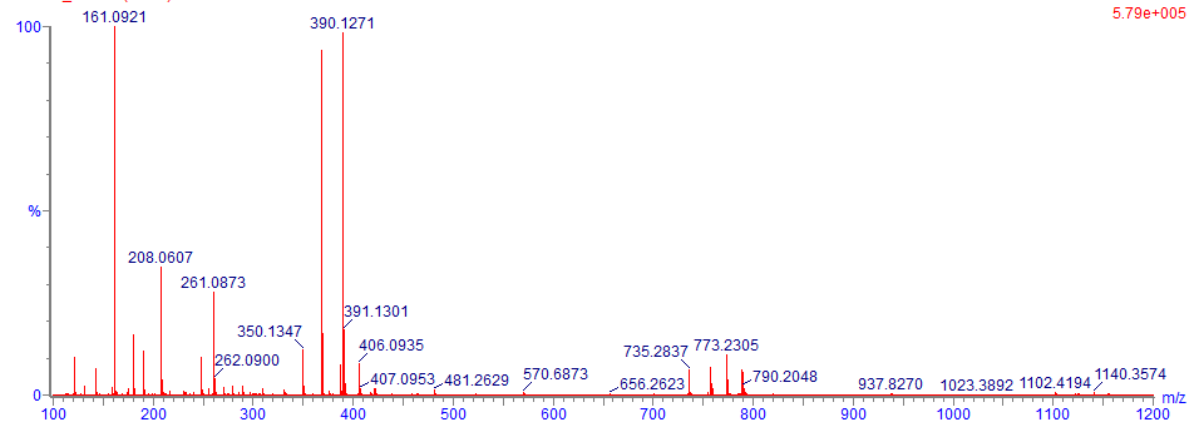

Figure S47. HRESI-MS spectrum of madurastatin G1 (4)

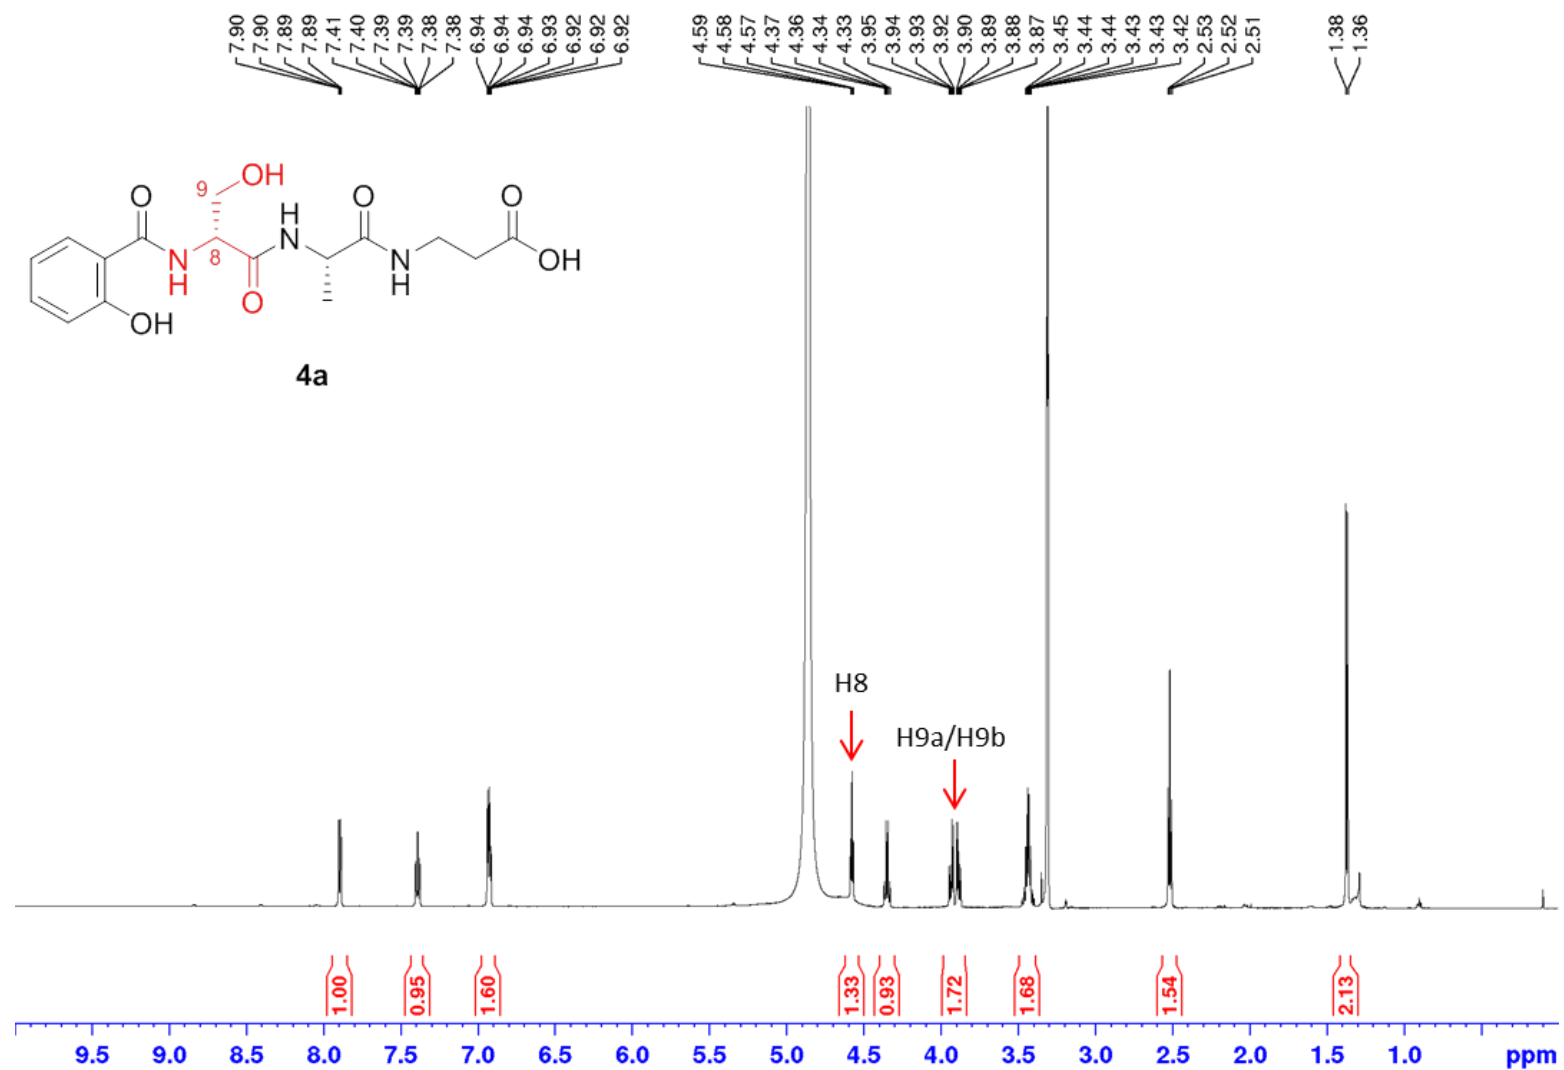

**Figure S48.** <sup>1</sup>H NMR spectrum of synthetic salicyl-D-Ser-Ala-βAla-OH (**4a**) (CD<sub>3</sub>OD, 600 MHz, 300 K)

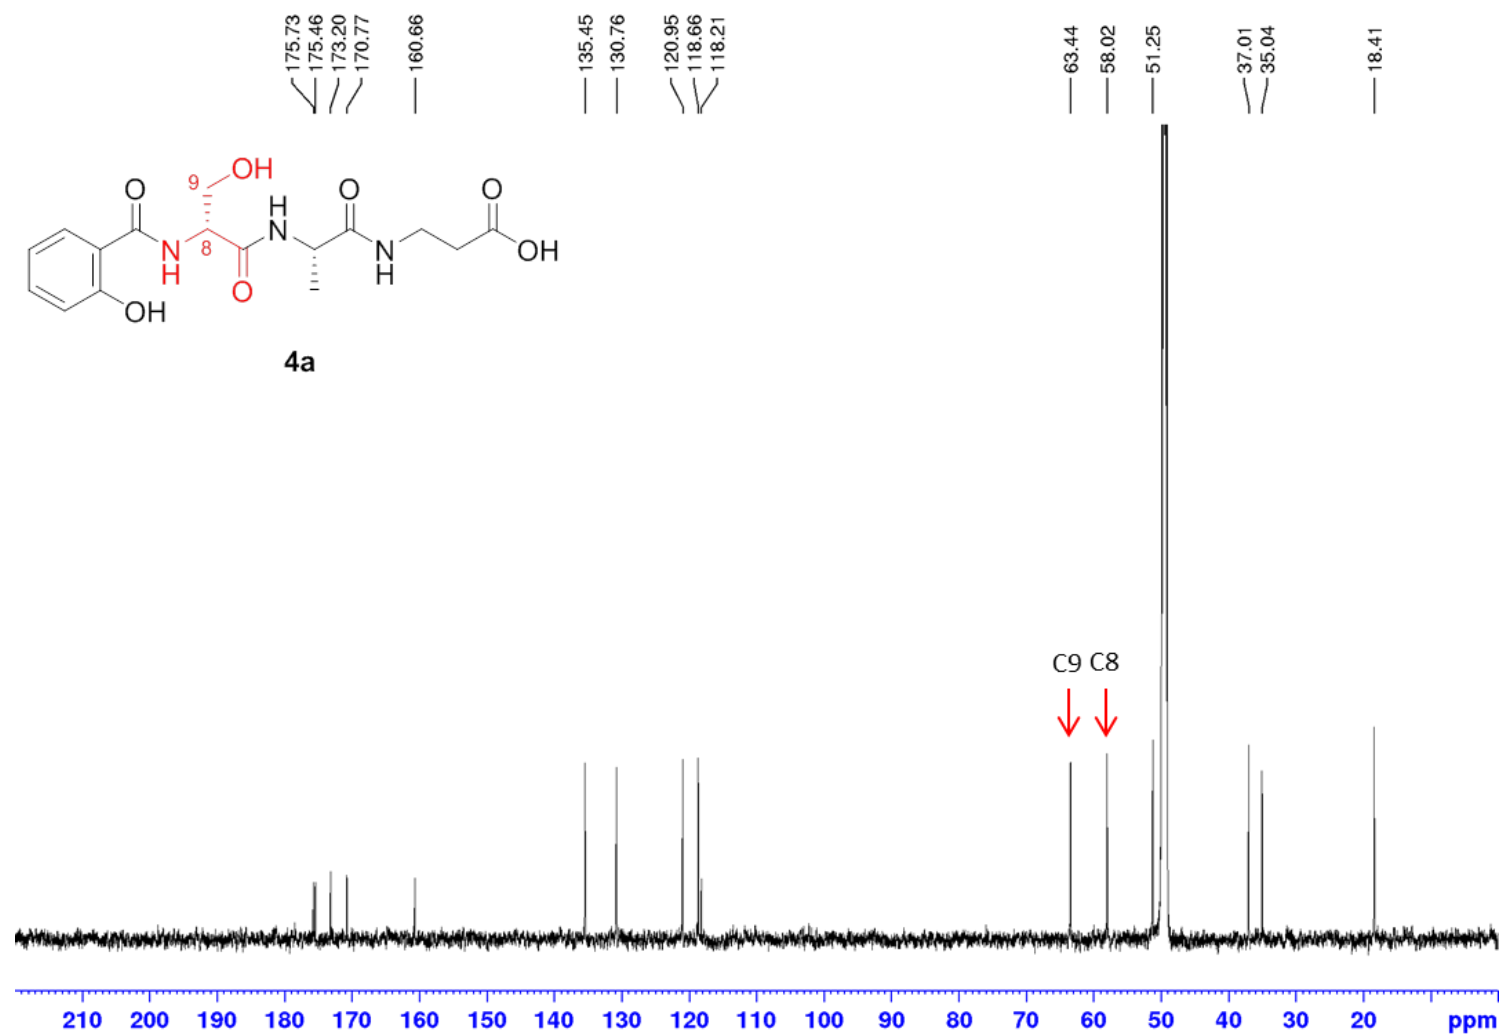

**Figure S49.** <sup>13</sup>C NMR spectrum of synthetic salicyl-D-Ser-Ala-βAla-OH (**4a**) (CD<sub>3</sub>OD, 150 MHz, 300 K)

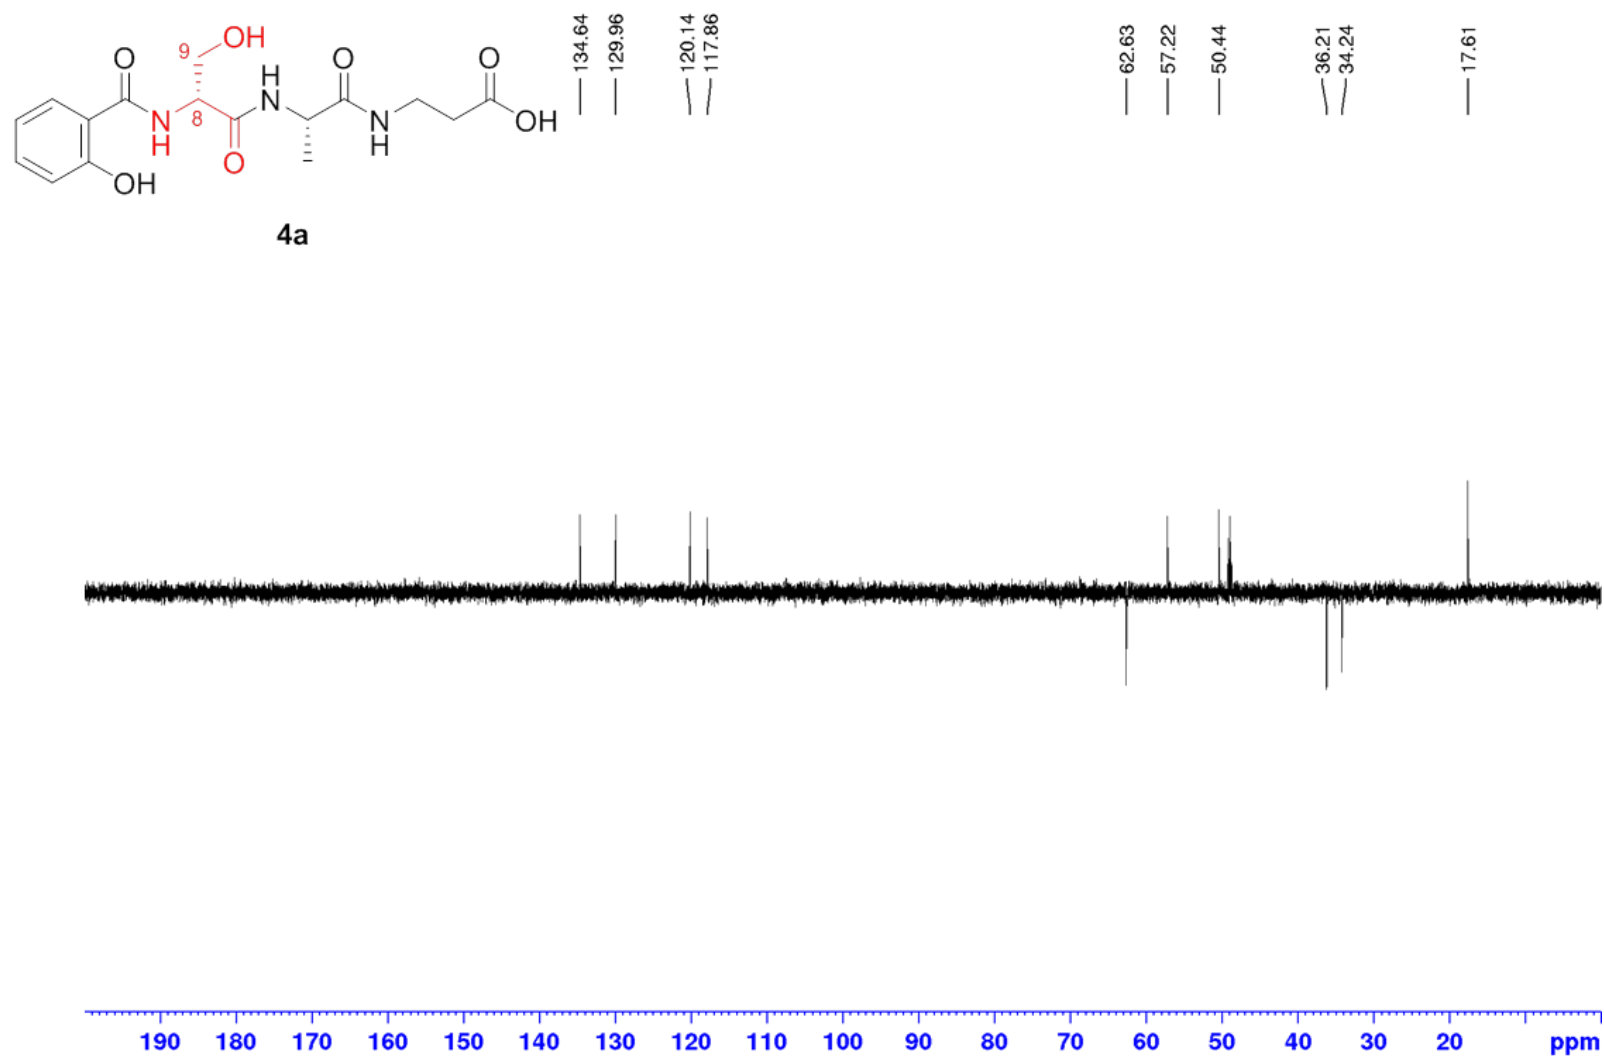

**Figure S50.** DEPT135 NMR spectrum of synthetic salicyl-D-Ser-Ala-βAla-OH (**4a**) (CD<sub>3</sub>OD, 150 MHz, 300 K)

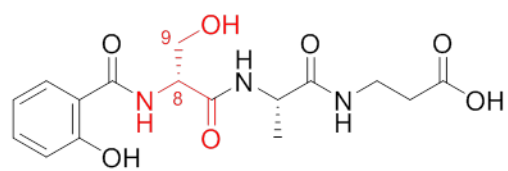

4a

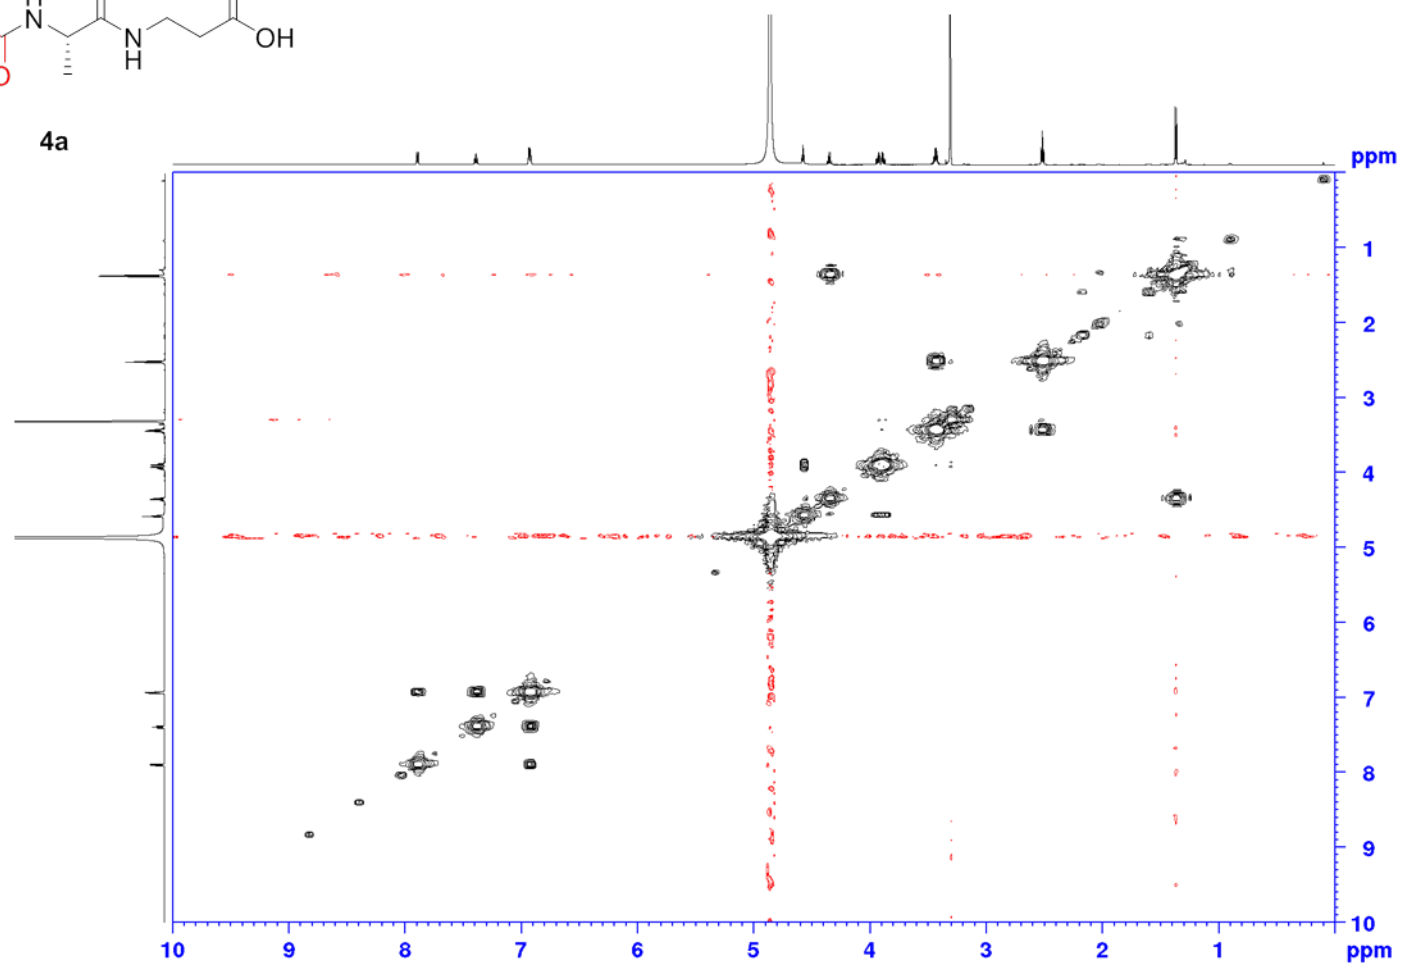

Figure S51.  $^1\text{H}$ - $^1\text{H}$  COSY NMR spectrum of synthetic salicyl-D-Ser-Ala-βAla-OH (4a) ( $\text{CD}_3\text{OD}$ , 600 MHz, 300 K)

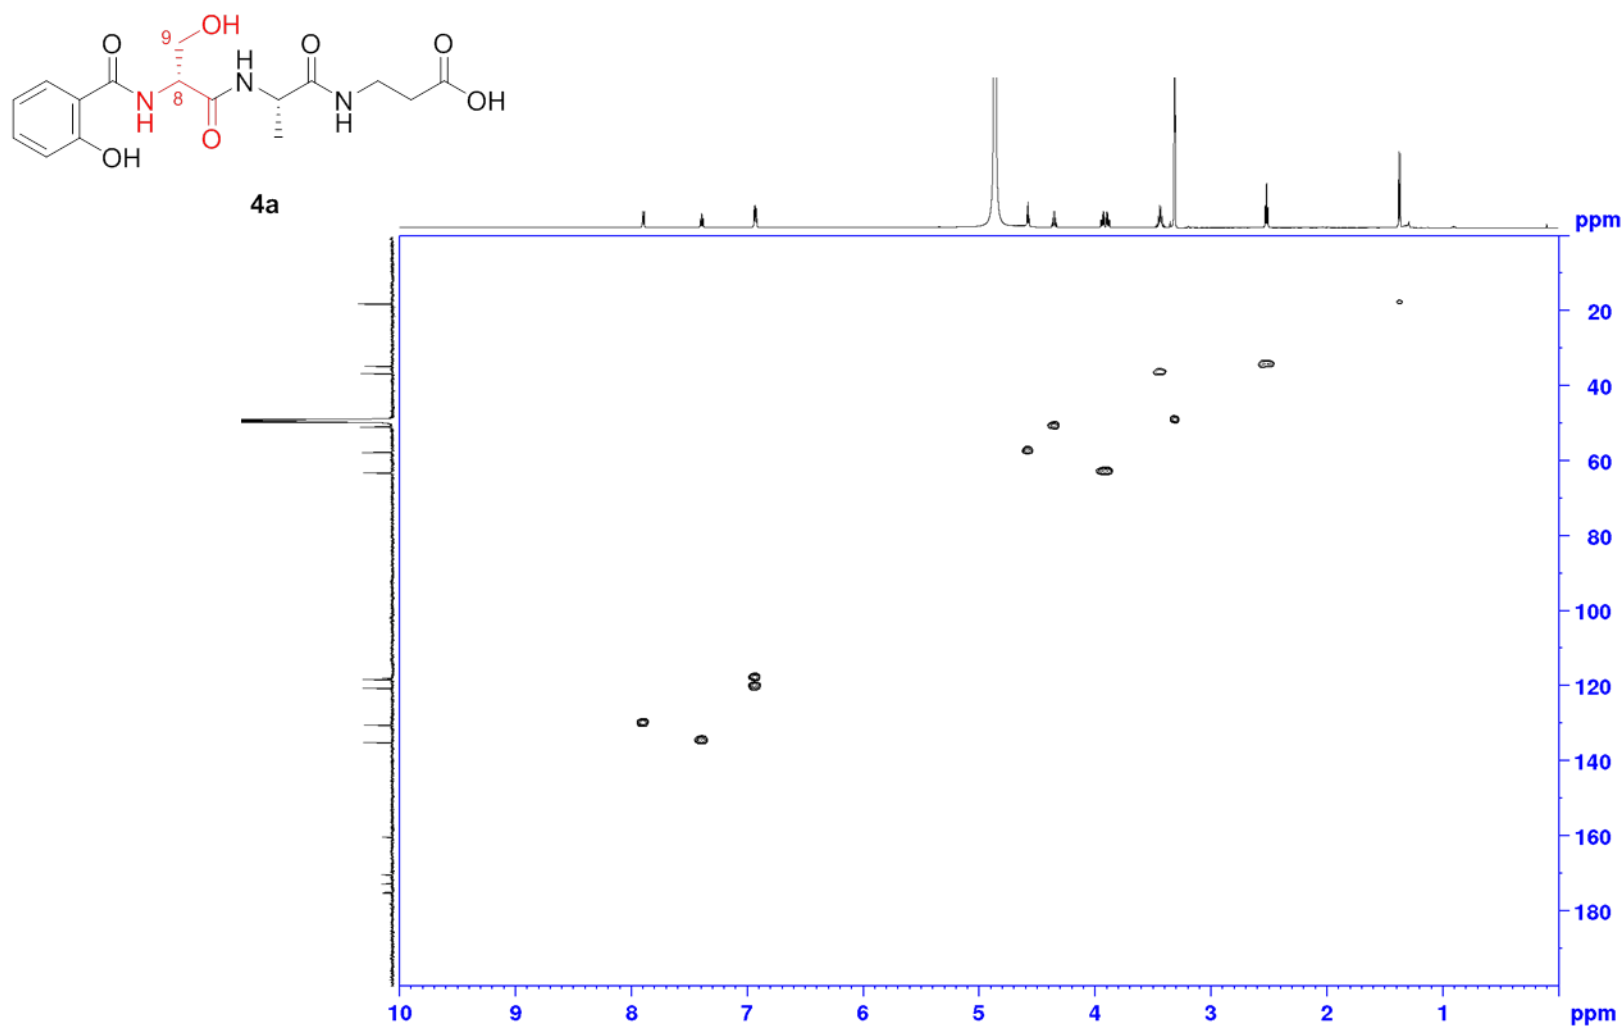

**Figure S52.** HSQC NMR spectrum of synthetic salicyl-D-Ser-Ala-βAla-OH (**4a**) (CD<sub>3</sub>OD, 600 MHz, 300 K)



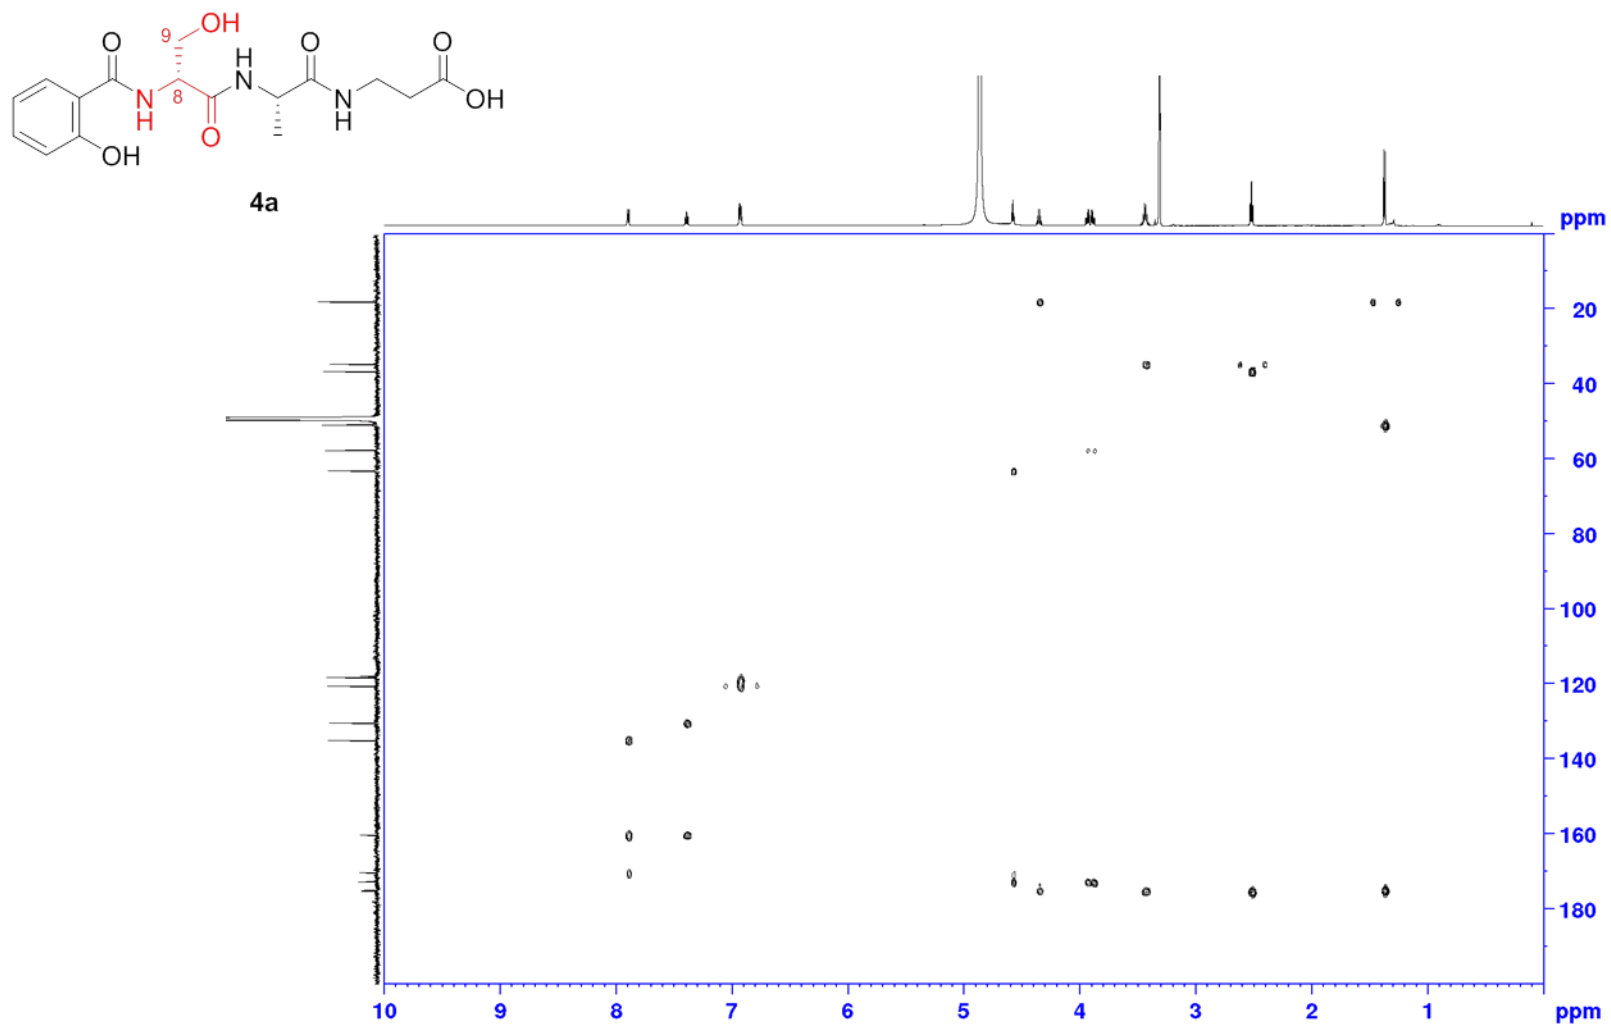

**Figure S53.** HMBC NMR spectrum of synthetic salicyl-D-Ser-Ala-βAla-OH (**4a**) (CD<sub>3</sub>OD, 600 MHz, 300 K)

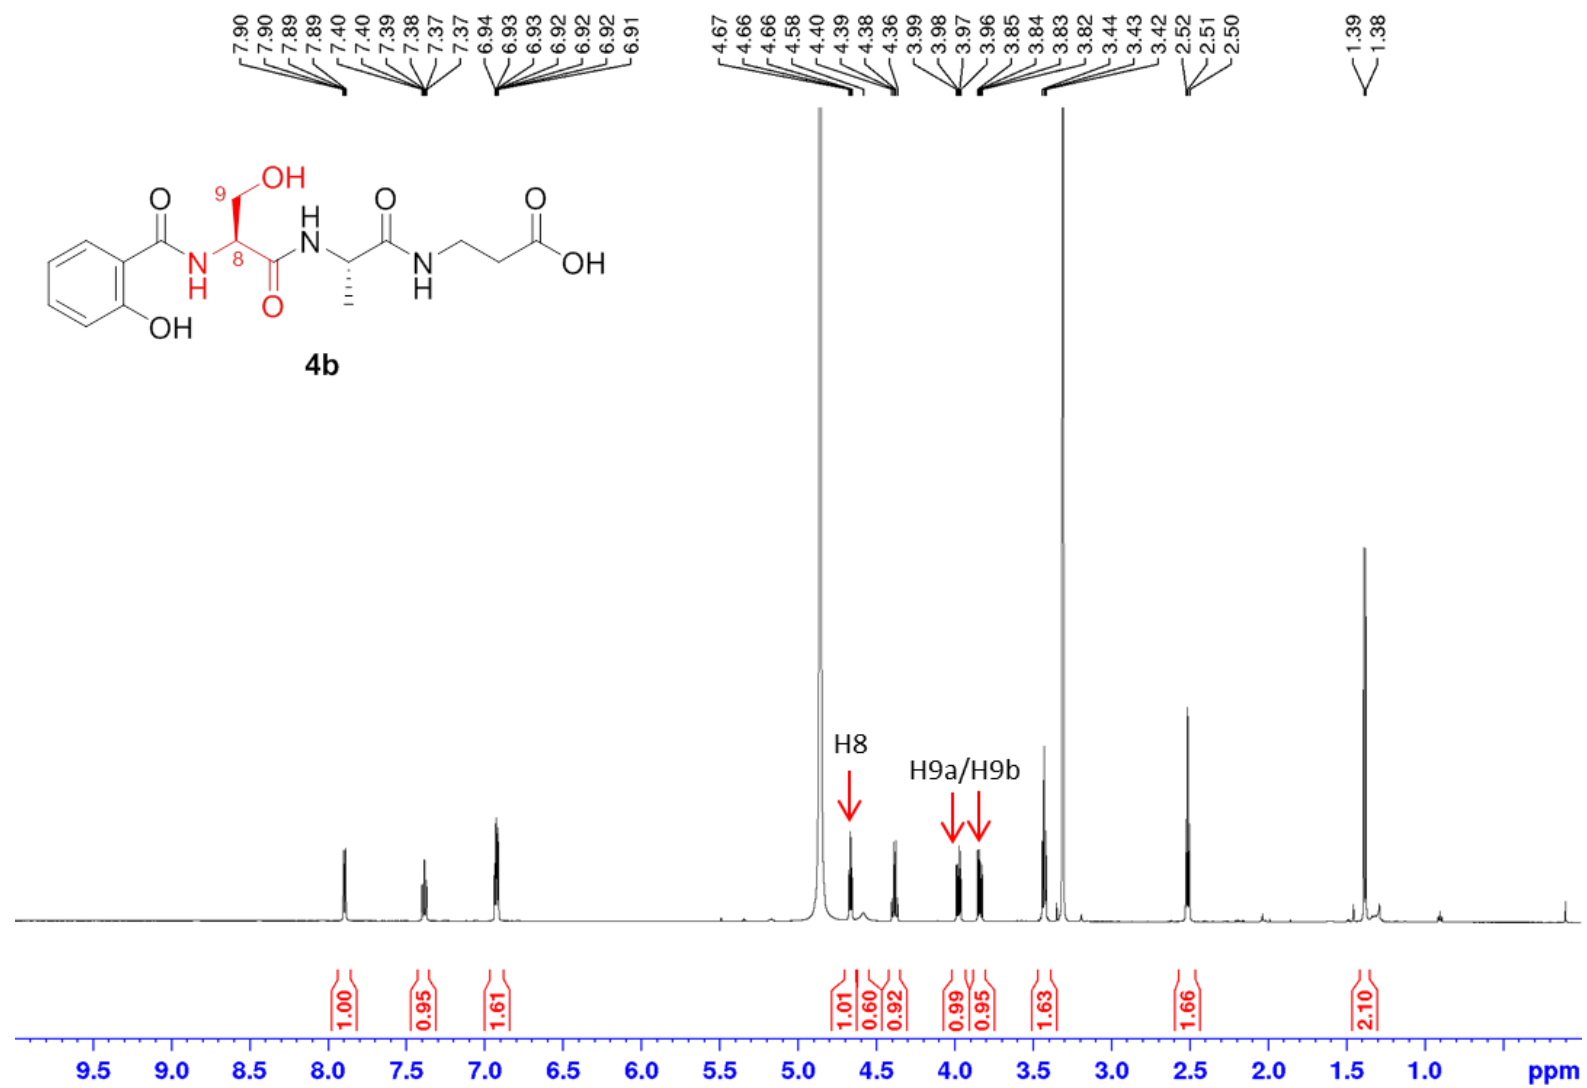

**Figure S54.** <sup>1</sup>H NMR spectrum of synthetic salicyl-L-Ser-Ala-βAla-OH (**4b**) (CD<sub>3</sub>OD, 600 MHz, 300 K)

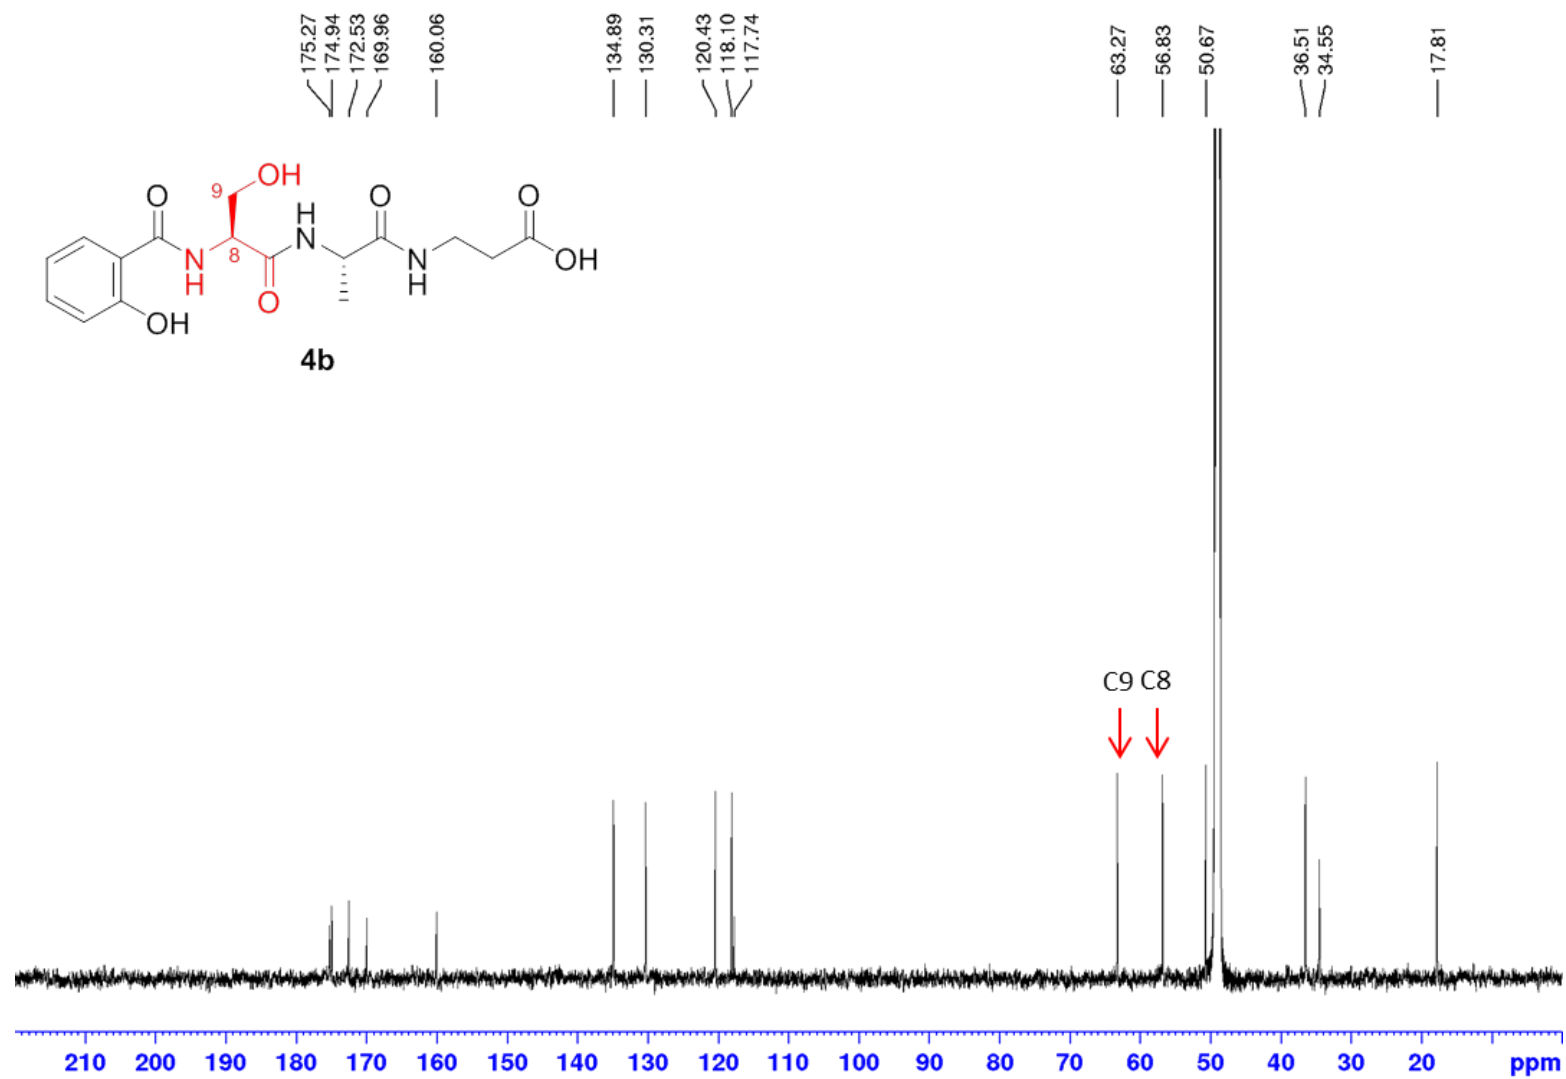

**Figure S55.** <sup>13</sup>C NMR spectrum of synthetic salicyl-L-Ser-Ala-βAla-OH (**4b**) (CD<sub>3</sub>OD, 150 MHz, 300 K)

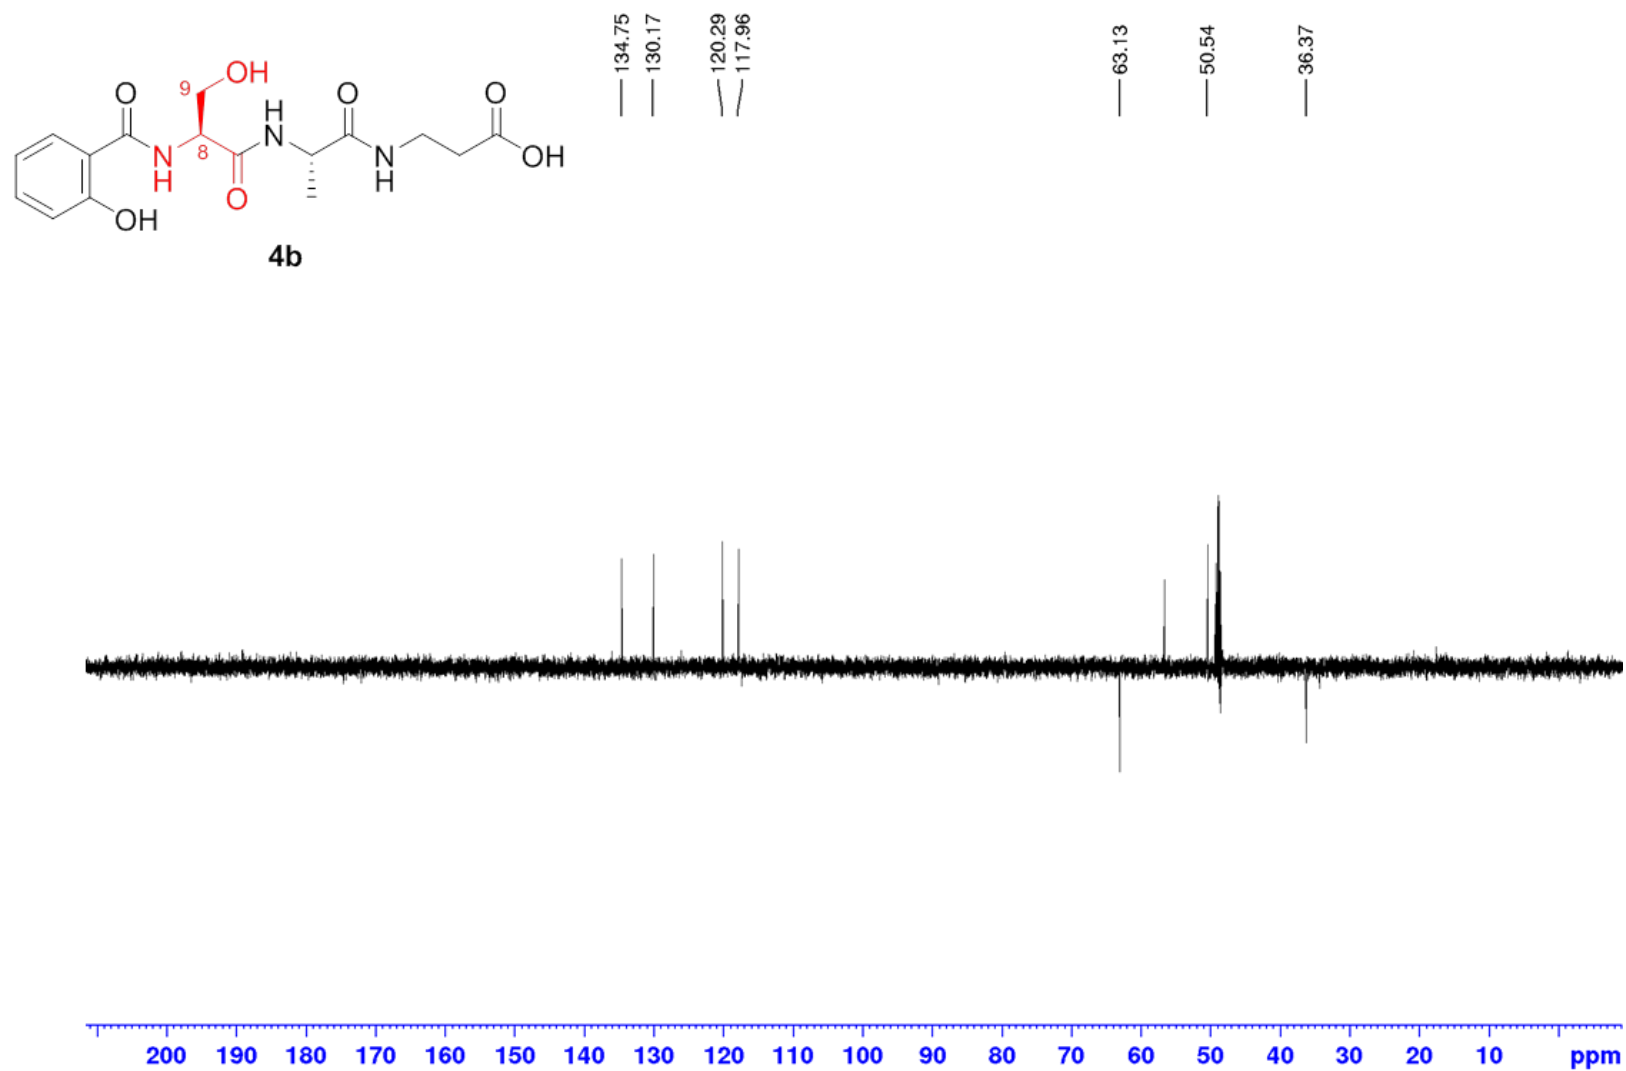

**Figure S56.** DEPT135 NMR spectrum of synthetic salicyl-L-Ser-Ala-βAla-OH (**4b**) (CD<sub>3</sub>OD, 150 MHz, 300 K)

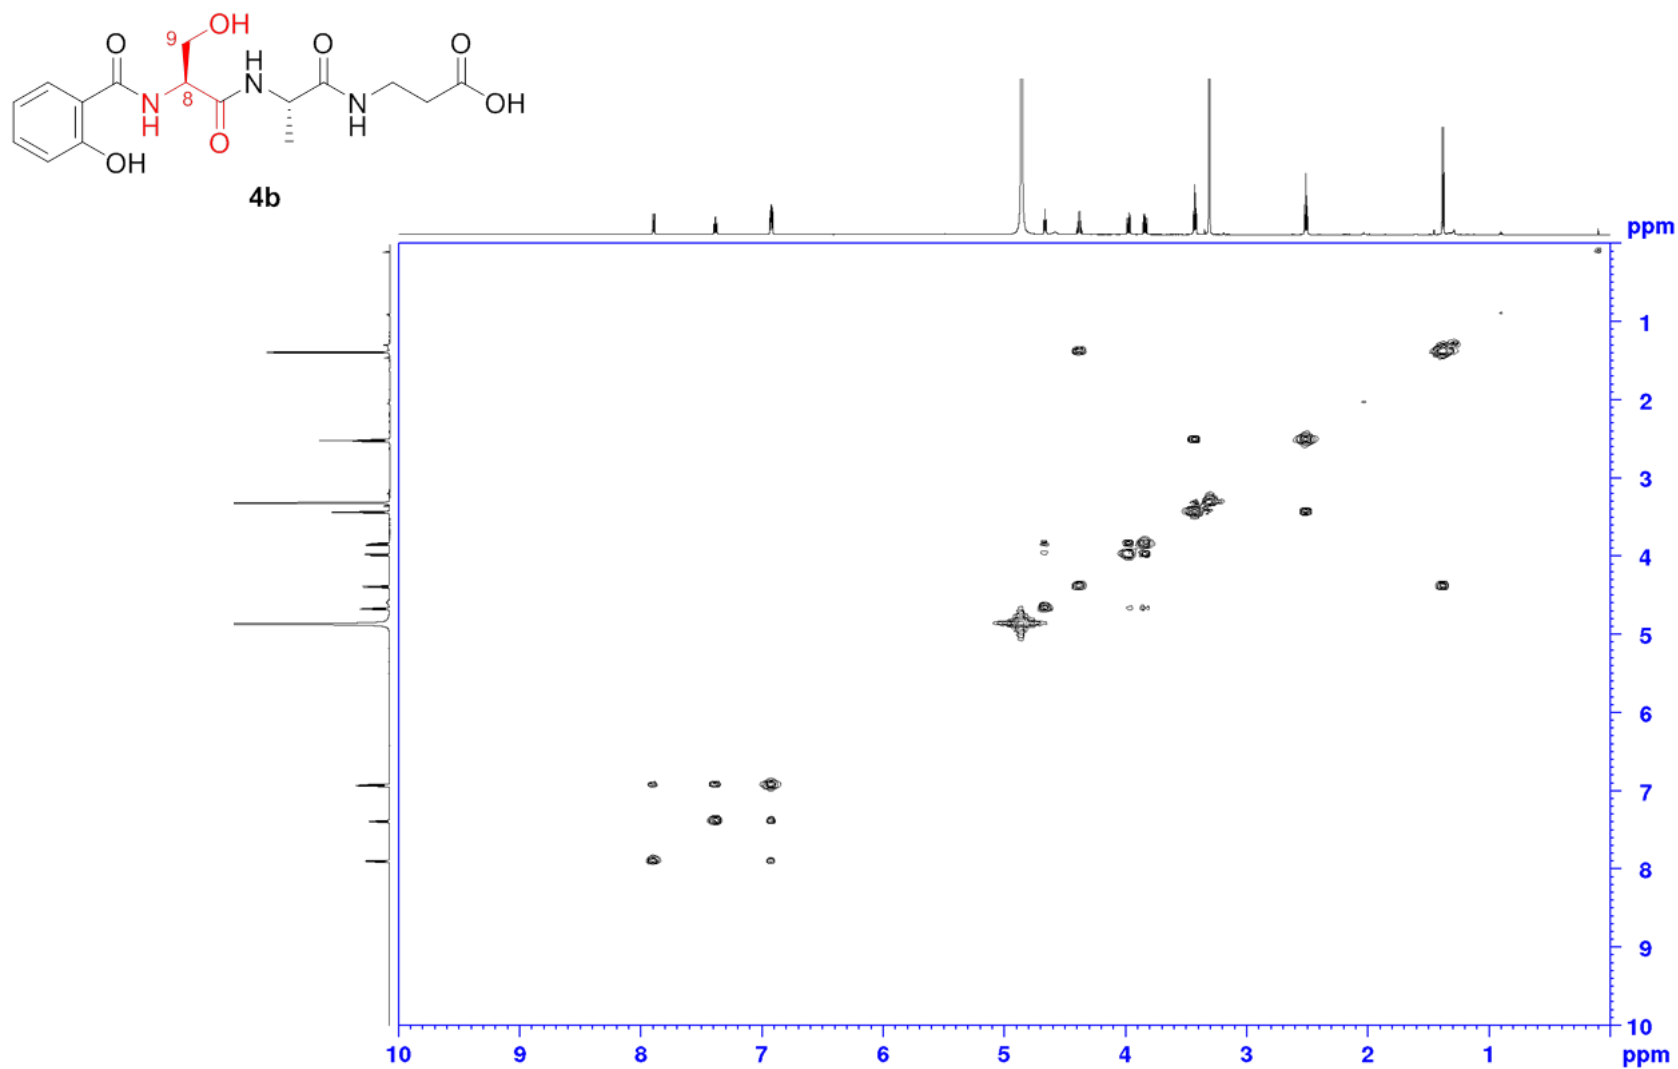

**Figure S57.** <sup>1</sup>H-<sup>1</sup>H COSY NMR spectrum of synthetic salicyl-L-Ser-Ala-βAla-OH (**4b**) (CD<sub>3</sub>OD, 600 MHz, 300 K)

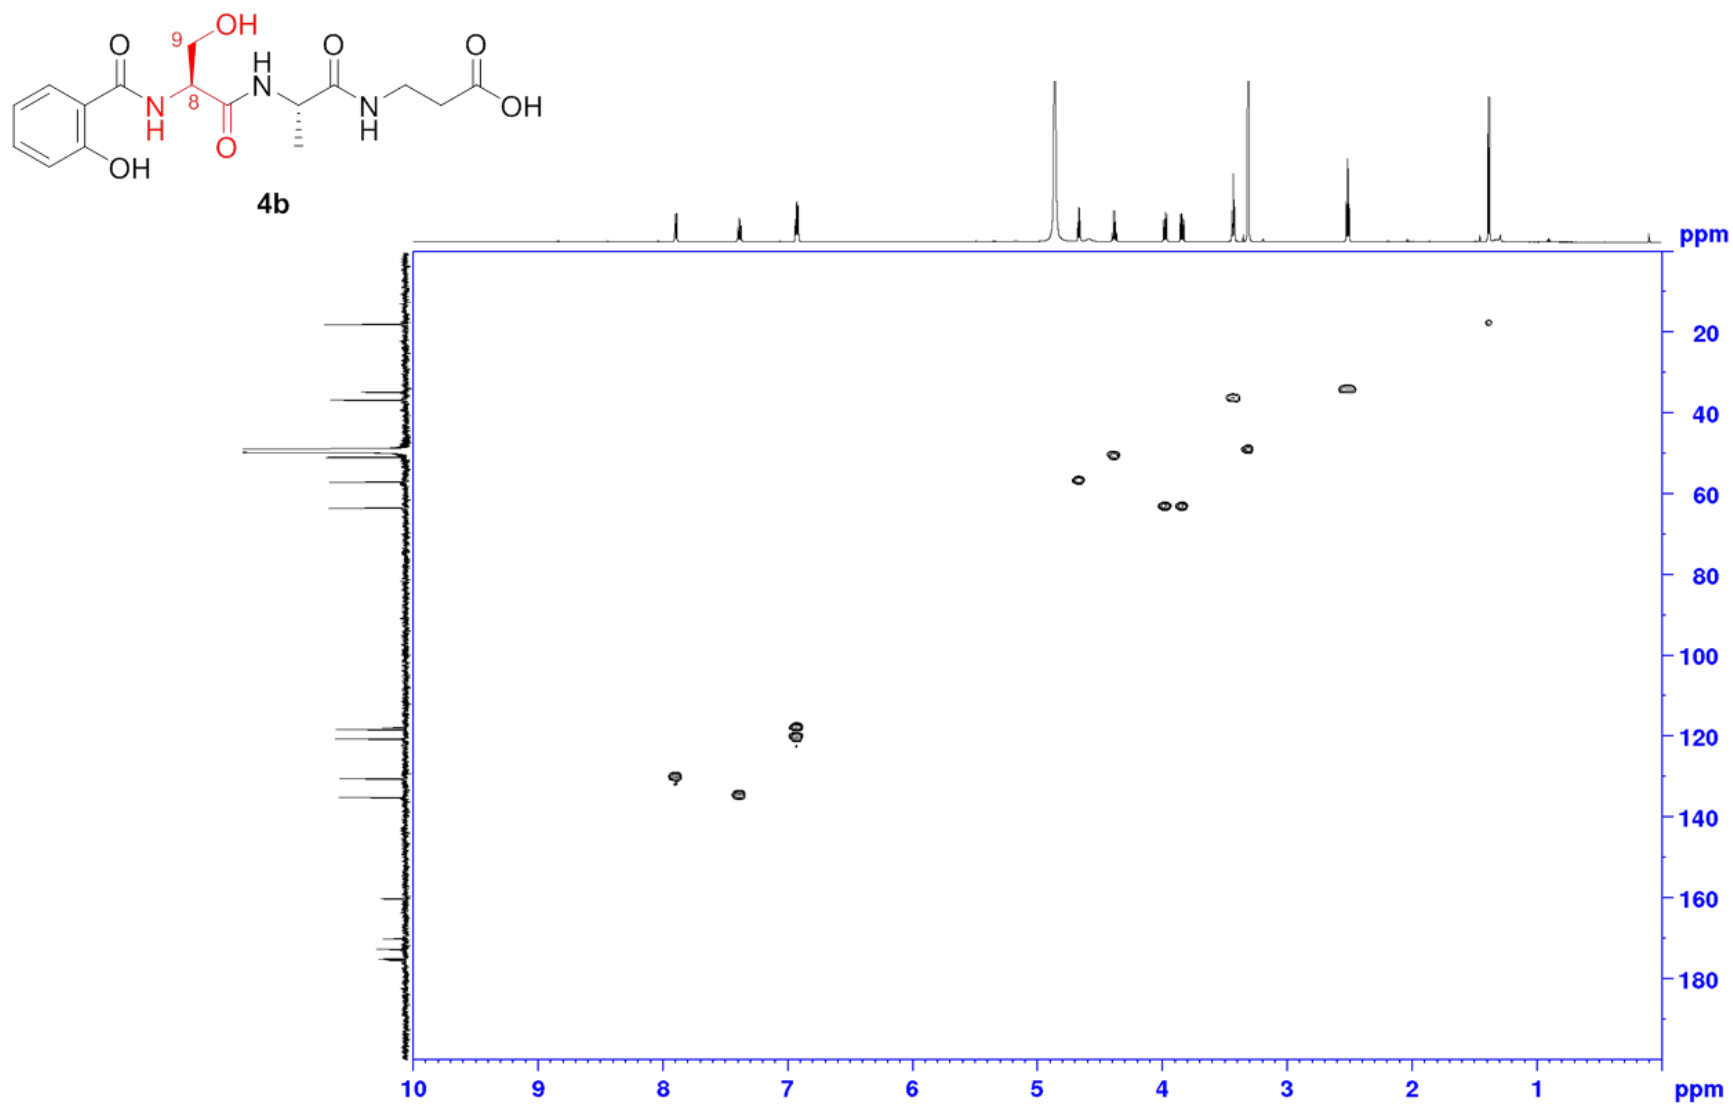

Figure S58. HSQC NMR spectrum of synthetic salicyl-L-Ser-Ala-βAla-OH (**4b**) (CD<sub>3</sub>OD, 600 MHz, 300 K)

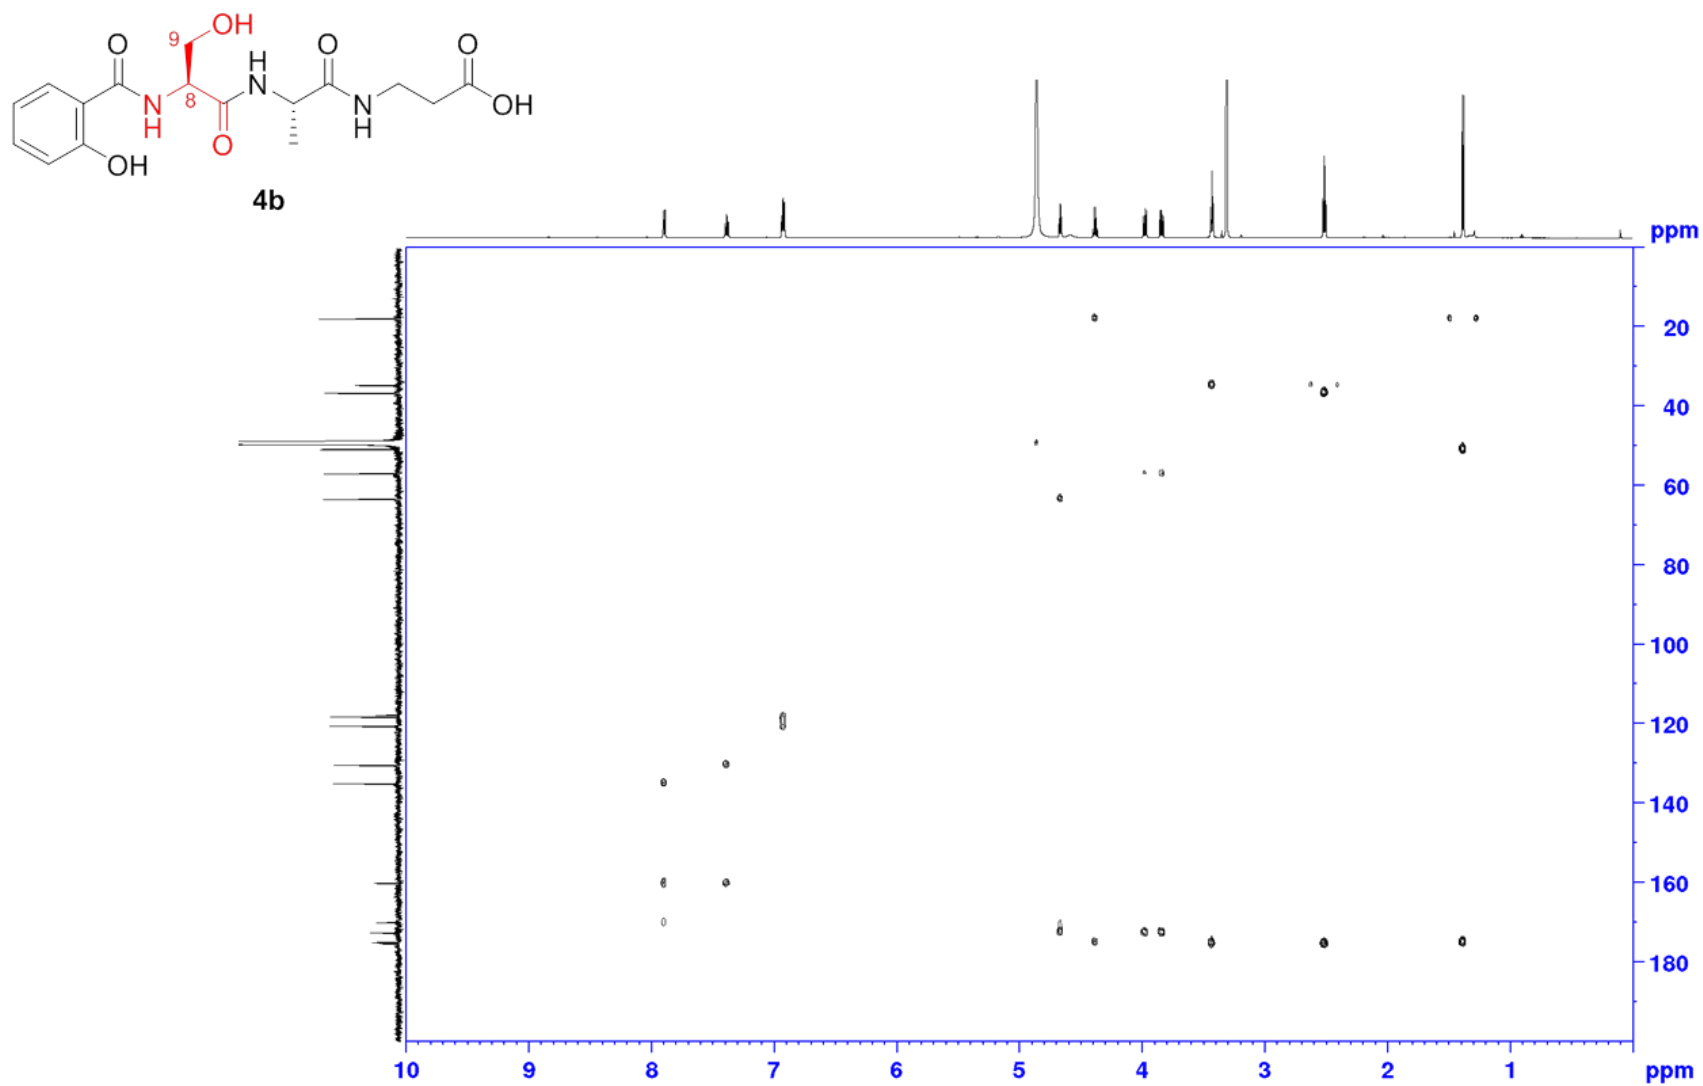

**Figure S59.** HMBC NMR spectrum of synthetic salicyl-L-Ser-Ala-βAla-OH (**4b**) (CD<sub>3</sub>OD, 600 MHz, 300 K)

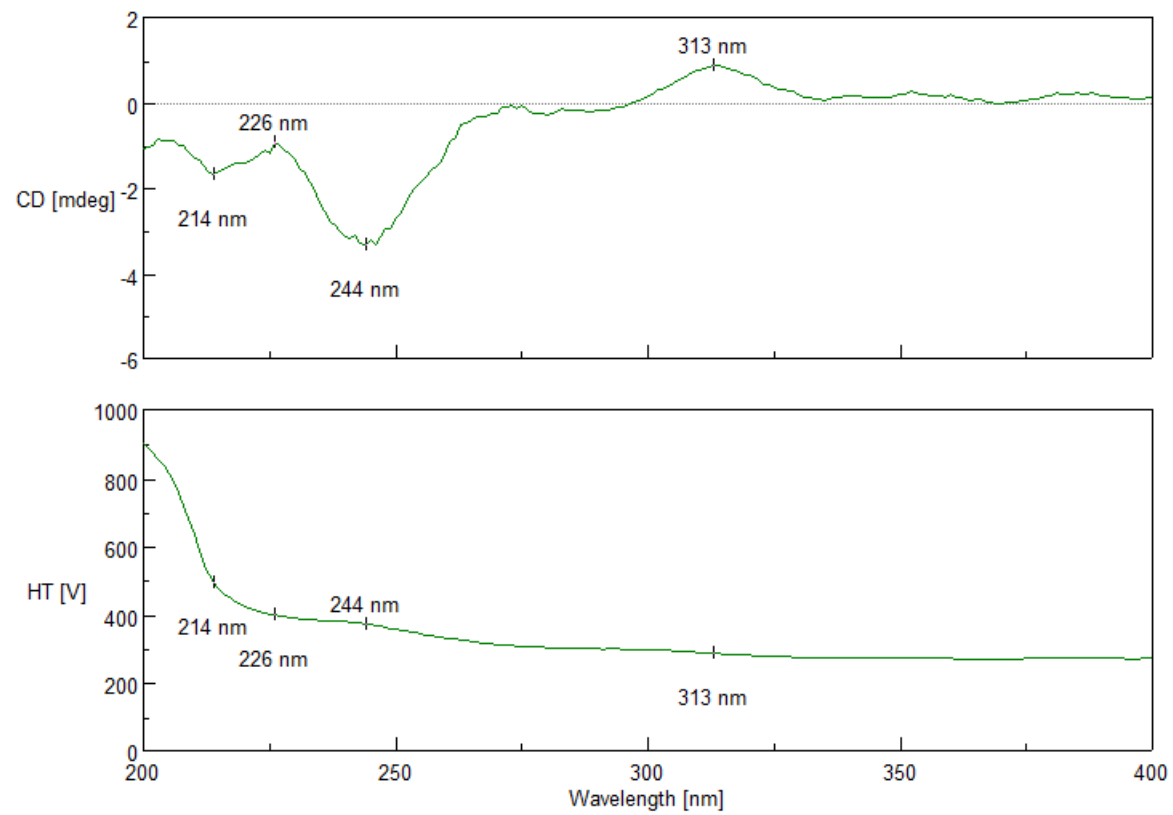

**Figure S60.** ECD spectrum of madurastatin G1 (**4a**) (MeOH)



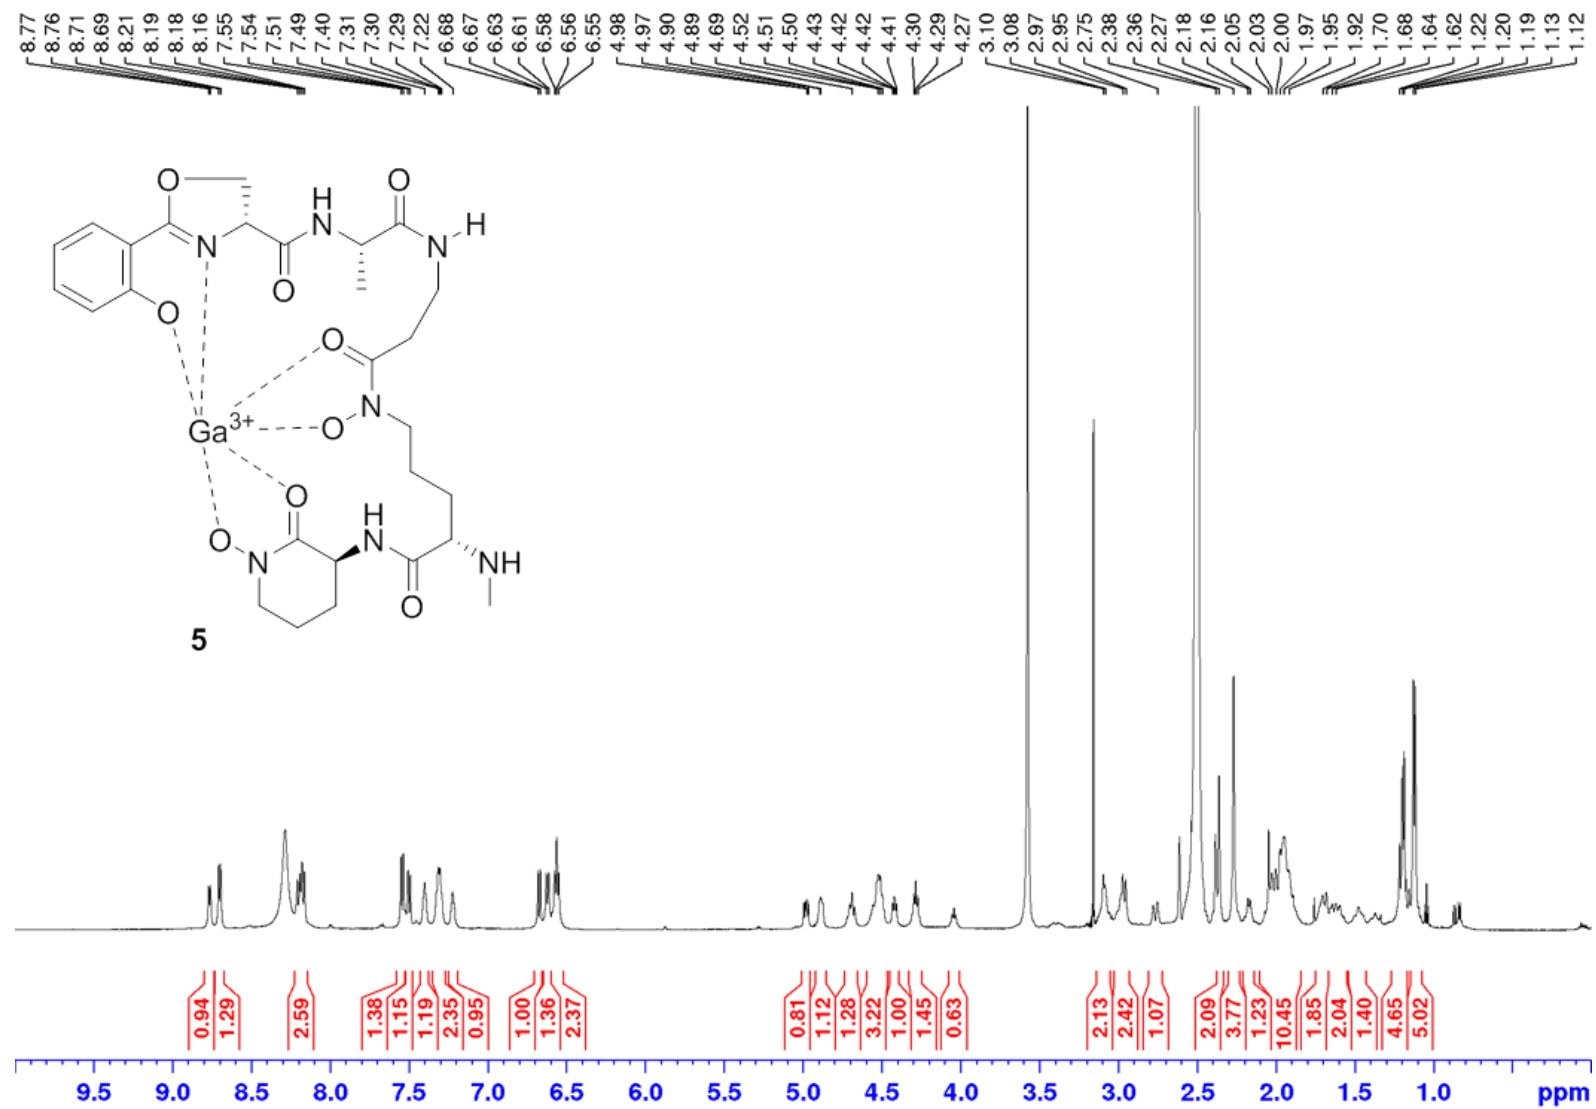

**Figure S61.** <sup>1</sup>H NMR spectrum of Ga<sup>3+</sup>-madurastatin A1 (**5**) (DMSO-*d*<sub>6</sub>, 600 MHz, 300 K)

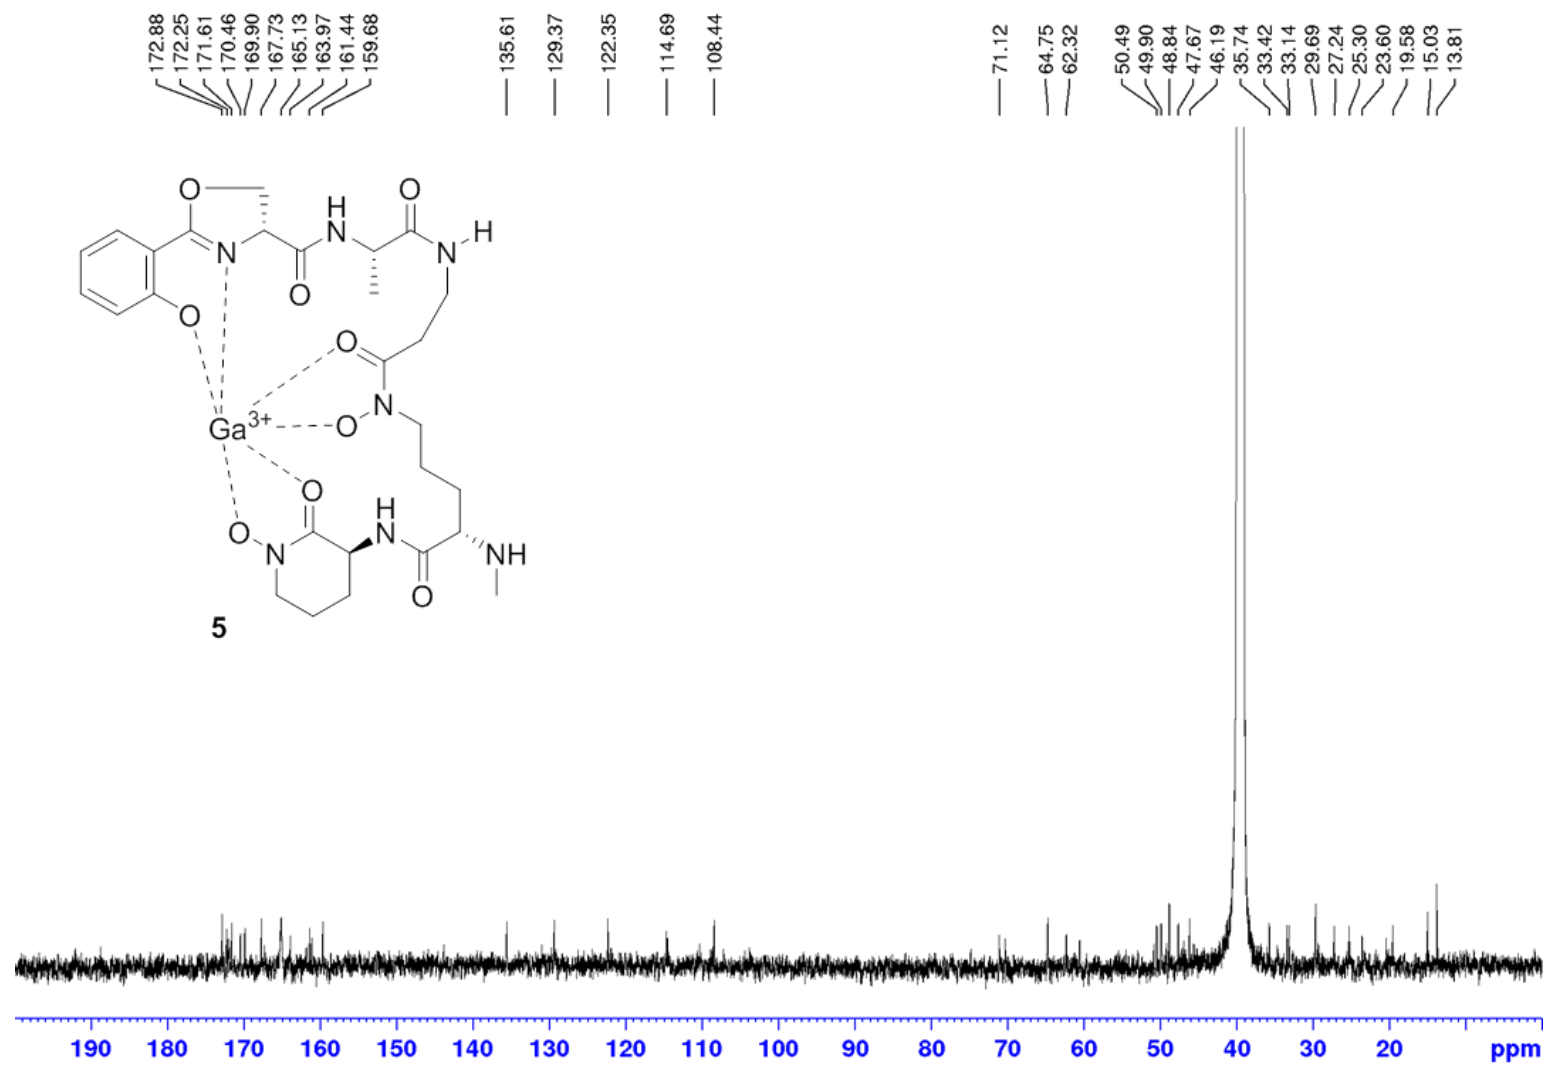

**Figure S62.**  $^{13}\text{C}$  NMR spectrum of  $\text{Ga}^{3+}$ -madurastatin A1 (5) (DMSO- $d_6$ , 150 MHz, 300 K)

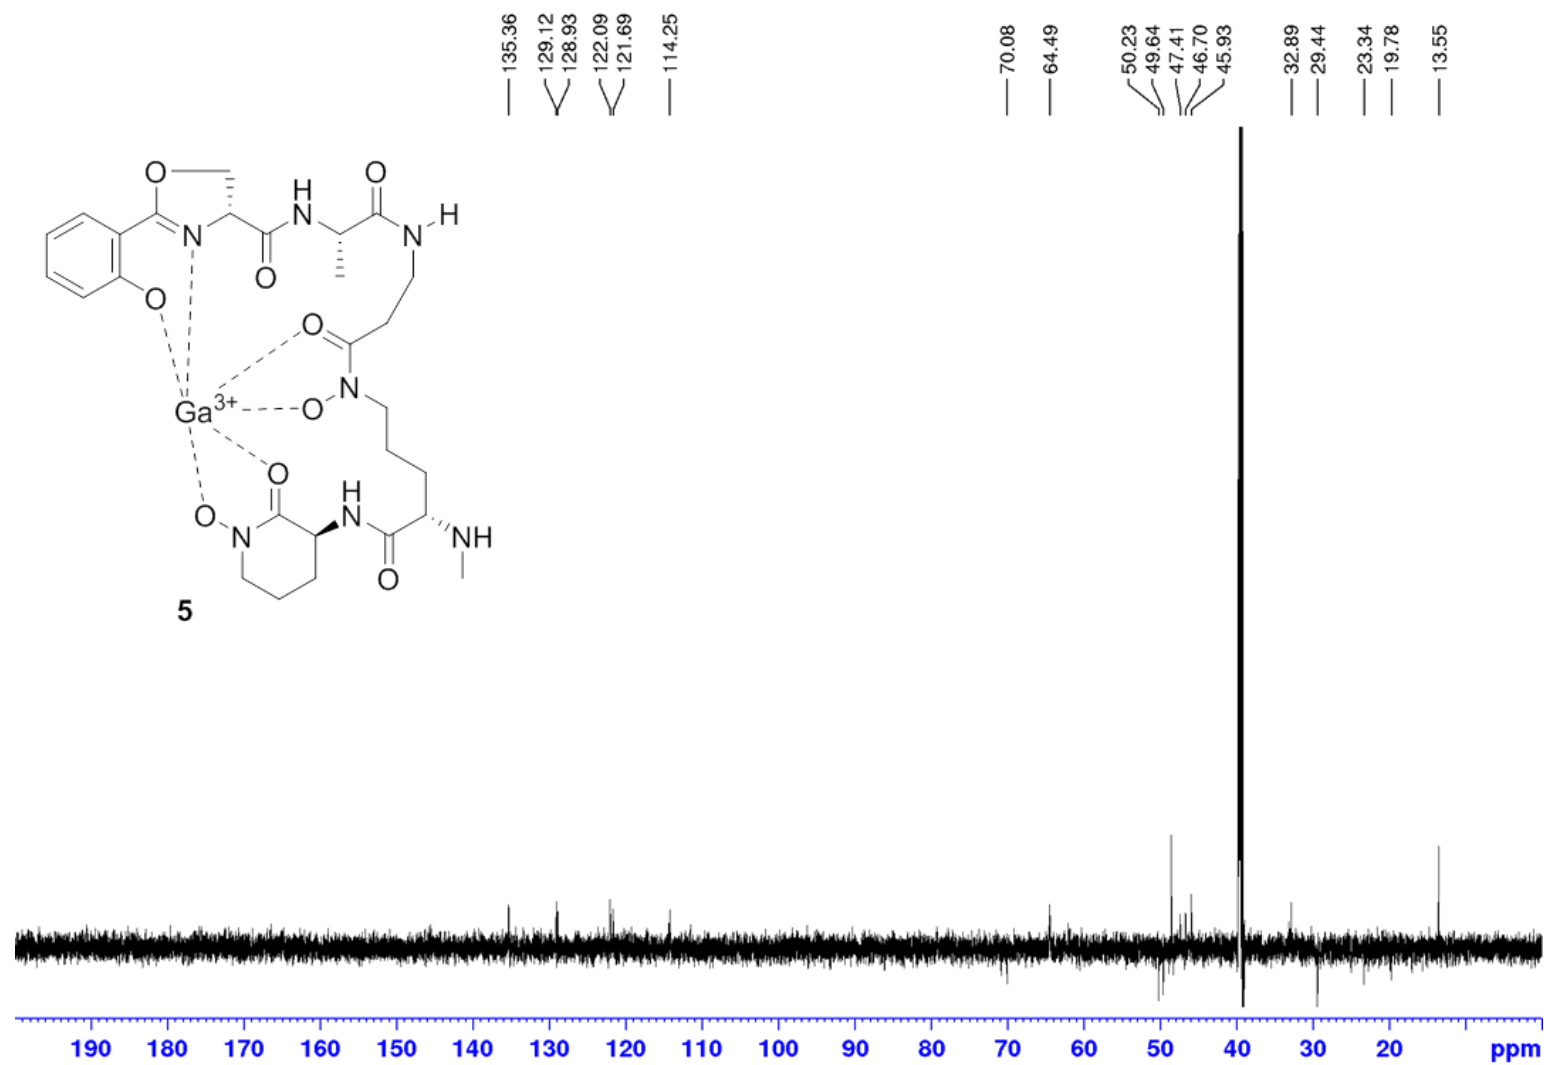

**Figure S63.** DEPT135 NMR spectrum of Ga<sup>3+</sup>-madurastatin A1 (**5**) (DMSO-*d*<sub>6</sub>, 150 MHz, 300 K)

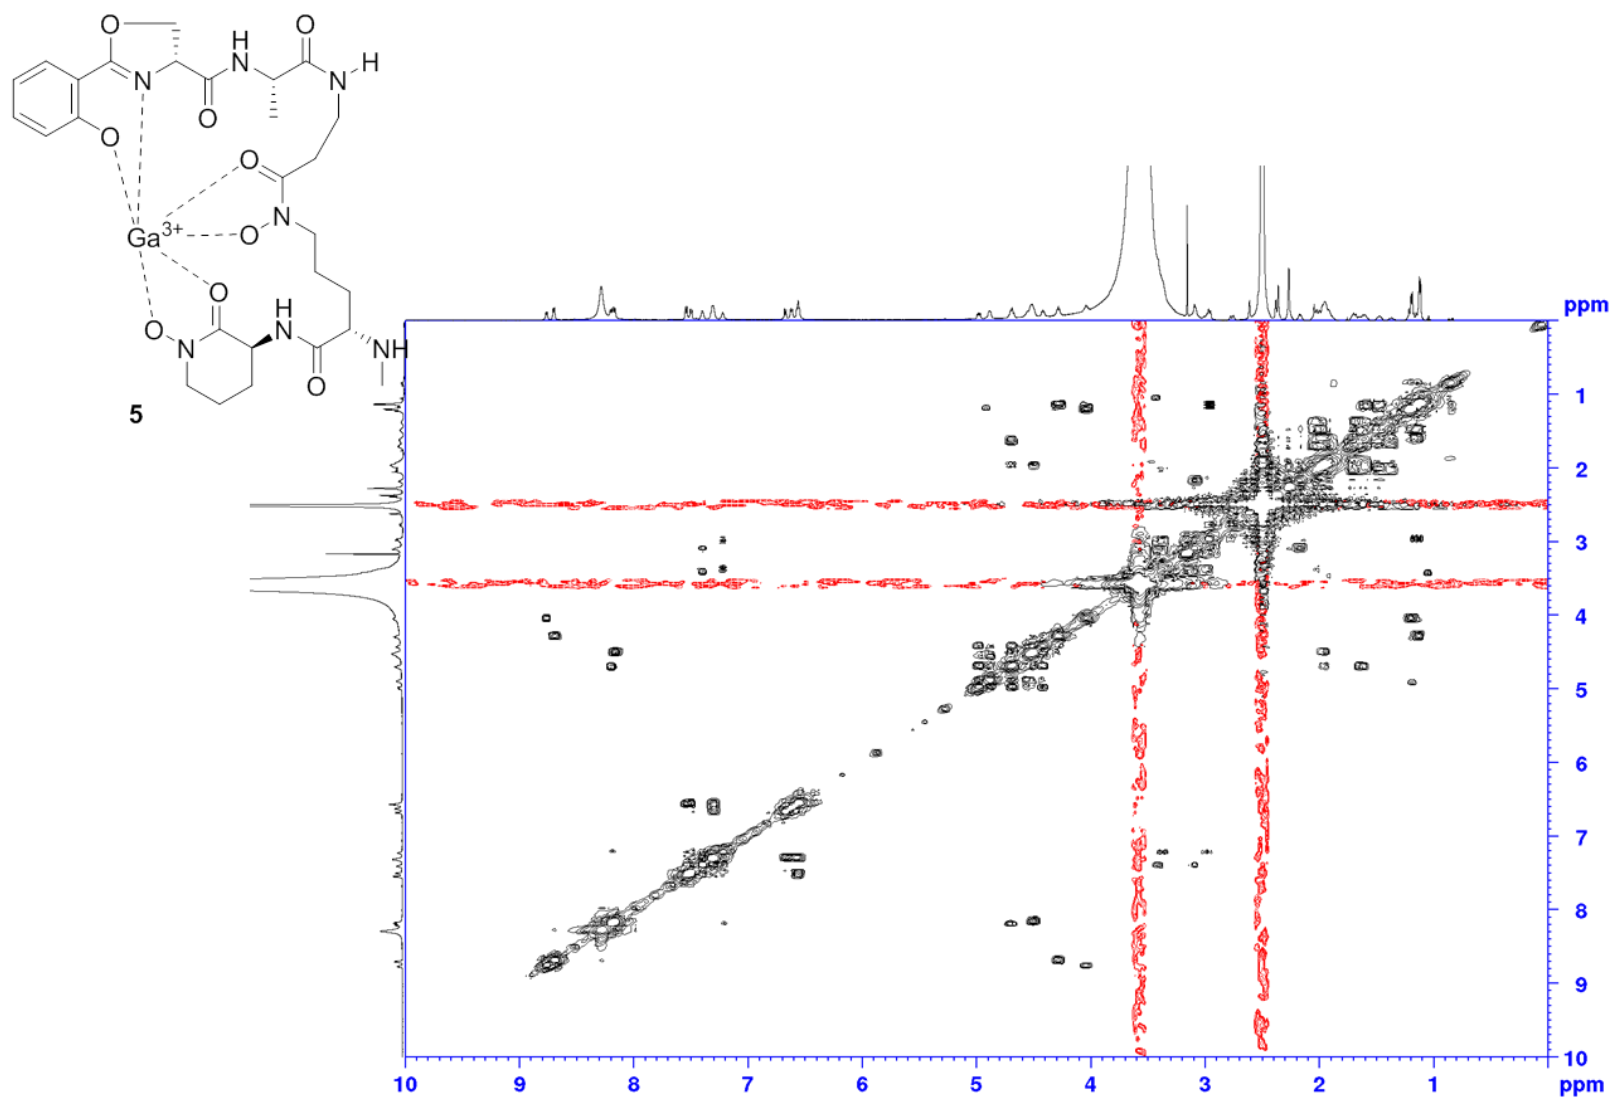

**Figure S64.**  $^1\text{H}$ - $^1\text{H}$  COSY NMR spectrum of  $\text{Ga}^{3+}$ -madurastatin A1 (5) ( $\text{DMSO-}d_6$ , 600 MHz, 300 K)

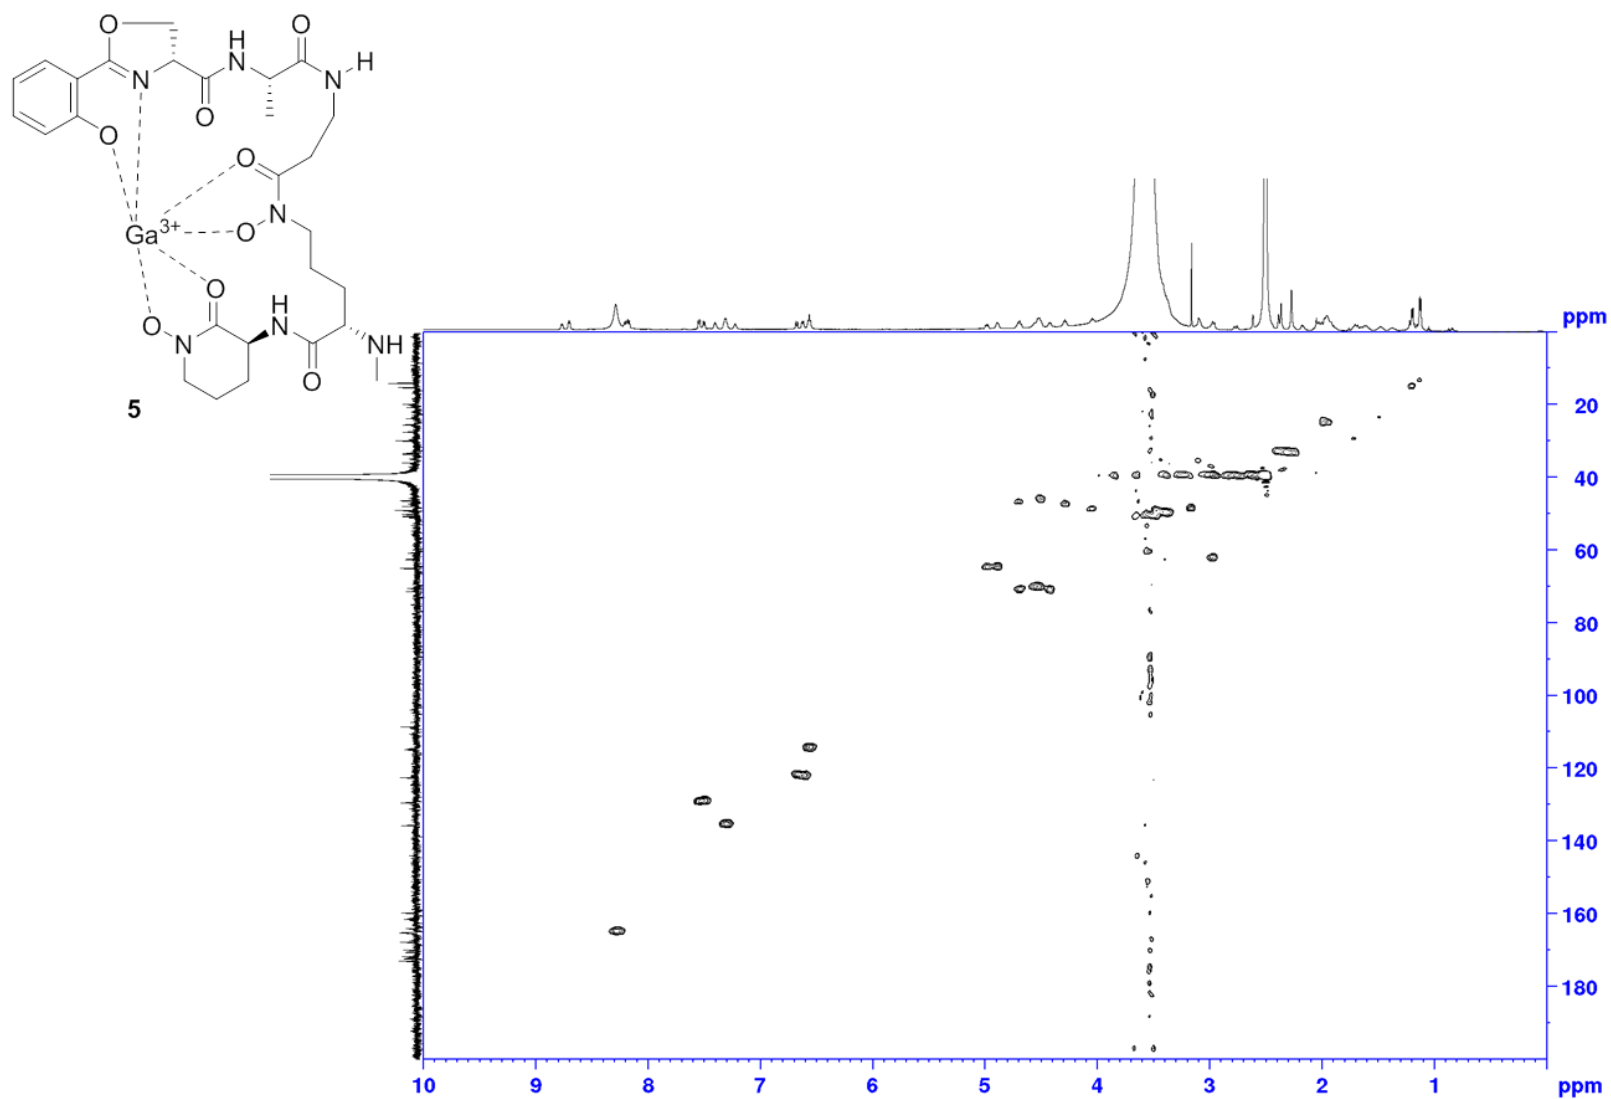

**Figure S65.** HSQC NMR spectrum of  $\text{Ga}^{3+}$ -madurastatin A1 (5) ( $\text{DMSO}-d_6$ , 600 MHz, 300 K)

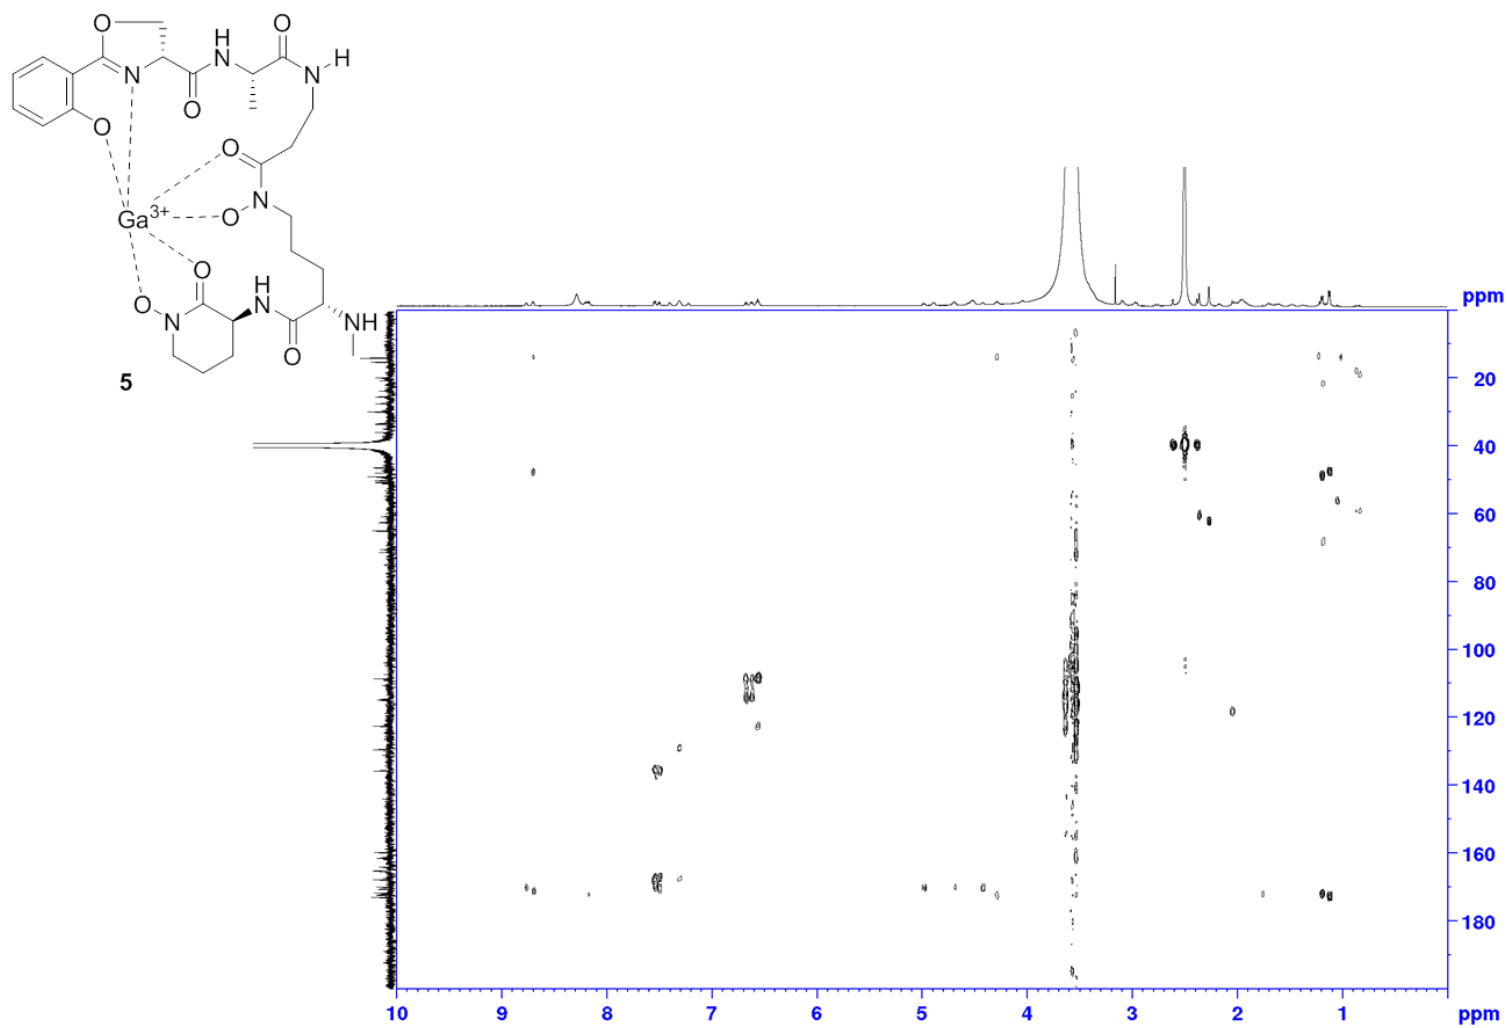

**Figure S66.** HMBC NMR spectrum of Ga-madurastatin A1 (**5**) (DMSO-*d*<sub>6</sub>, 600 MHz, 300 K).

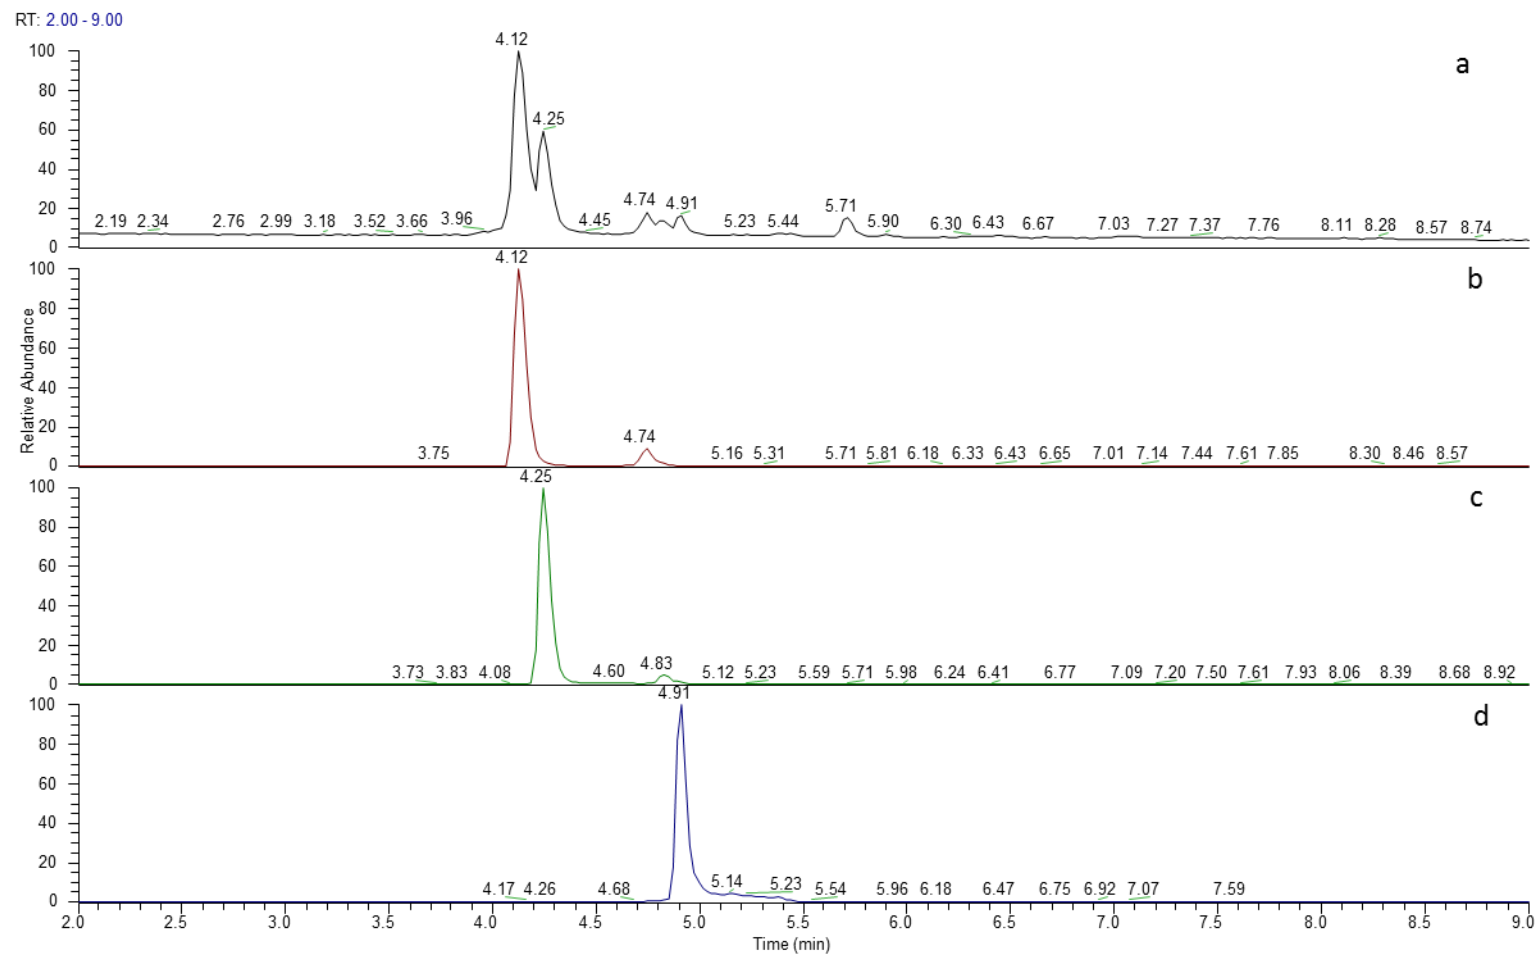

**Figure S67.** LC-HRESI-MS chromatogram of compound **5** enriched HPLC fraction. A) Total ion chromatogram (TIC); B) Extracted ion chromatogram (EIC) of Ga<sup>3+</sup> complex of **5** for *m/z* 672.1891; C) Extract ion chromatogram (EIC) of Fe<sup>3+</sup> complex of **5** for *m/z* 659.1984; D) Extracted ion chromatogram (EIC) of apo-**5** for *m/z* 606.2866.

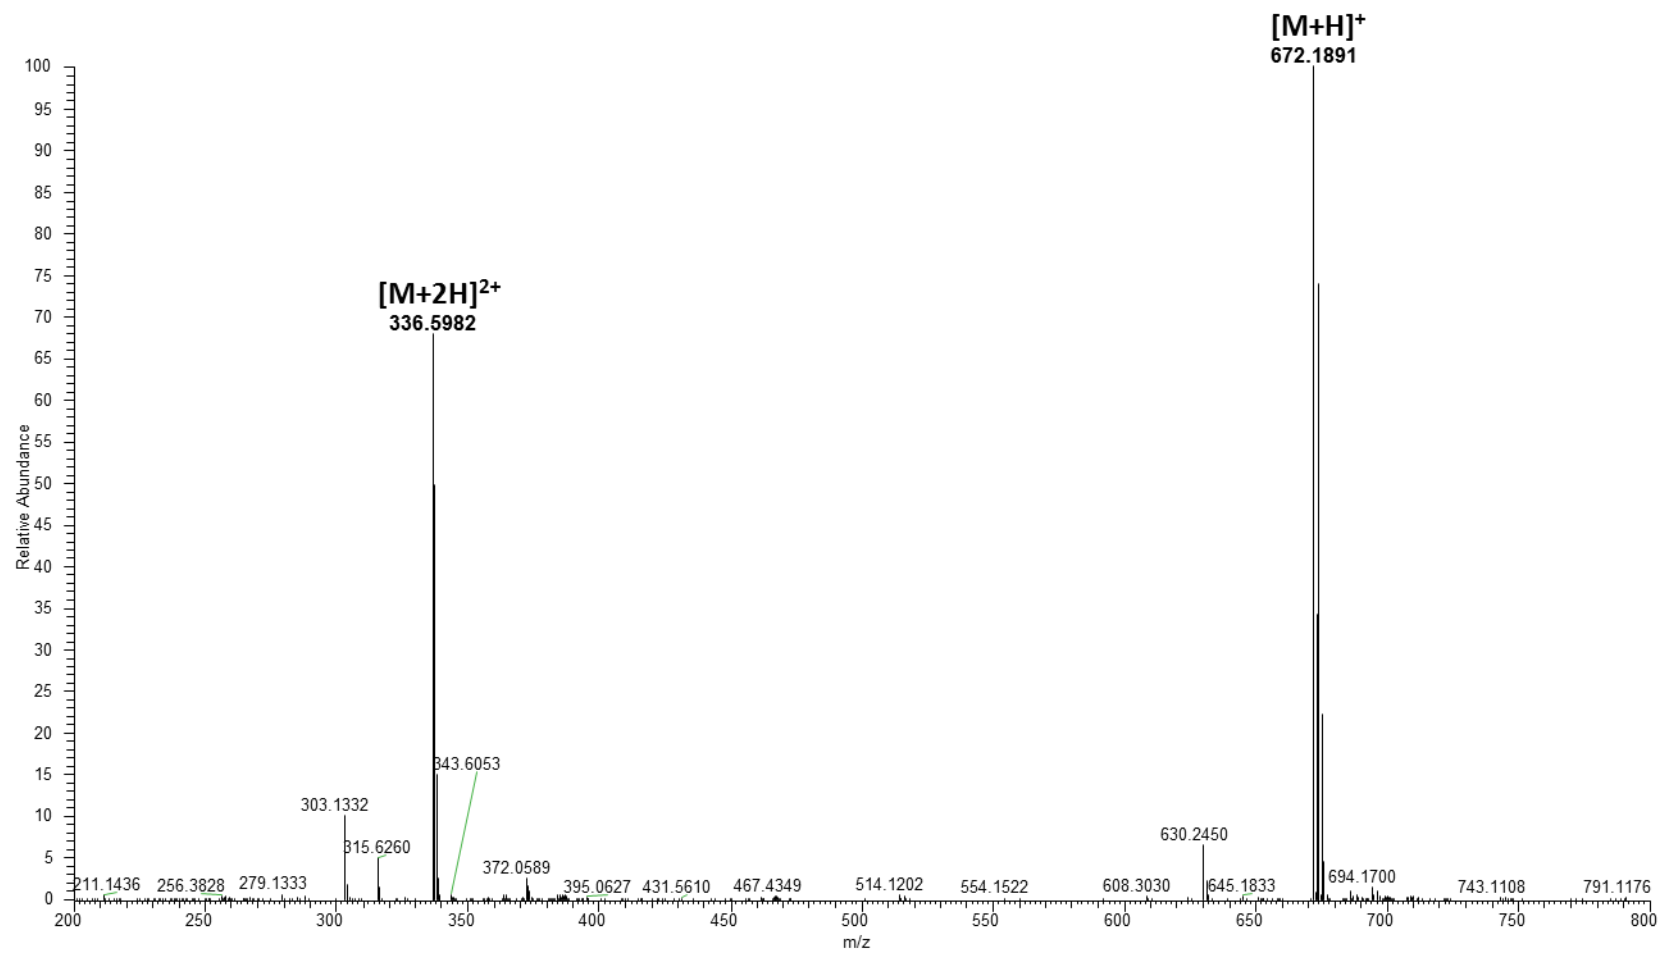

**Figure S68.** LC-HRESI-MS spectrum of  $Ga^{3+}$  complex of **5**, positive mode.



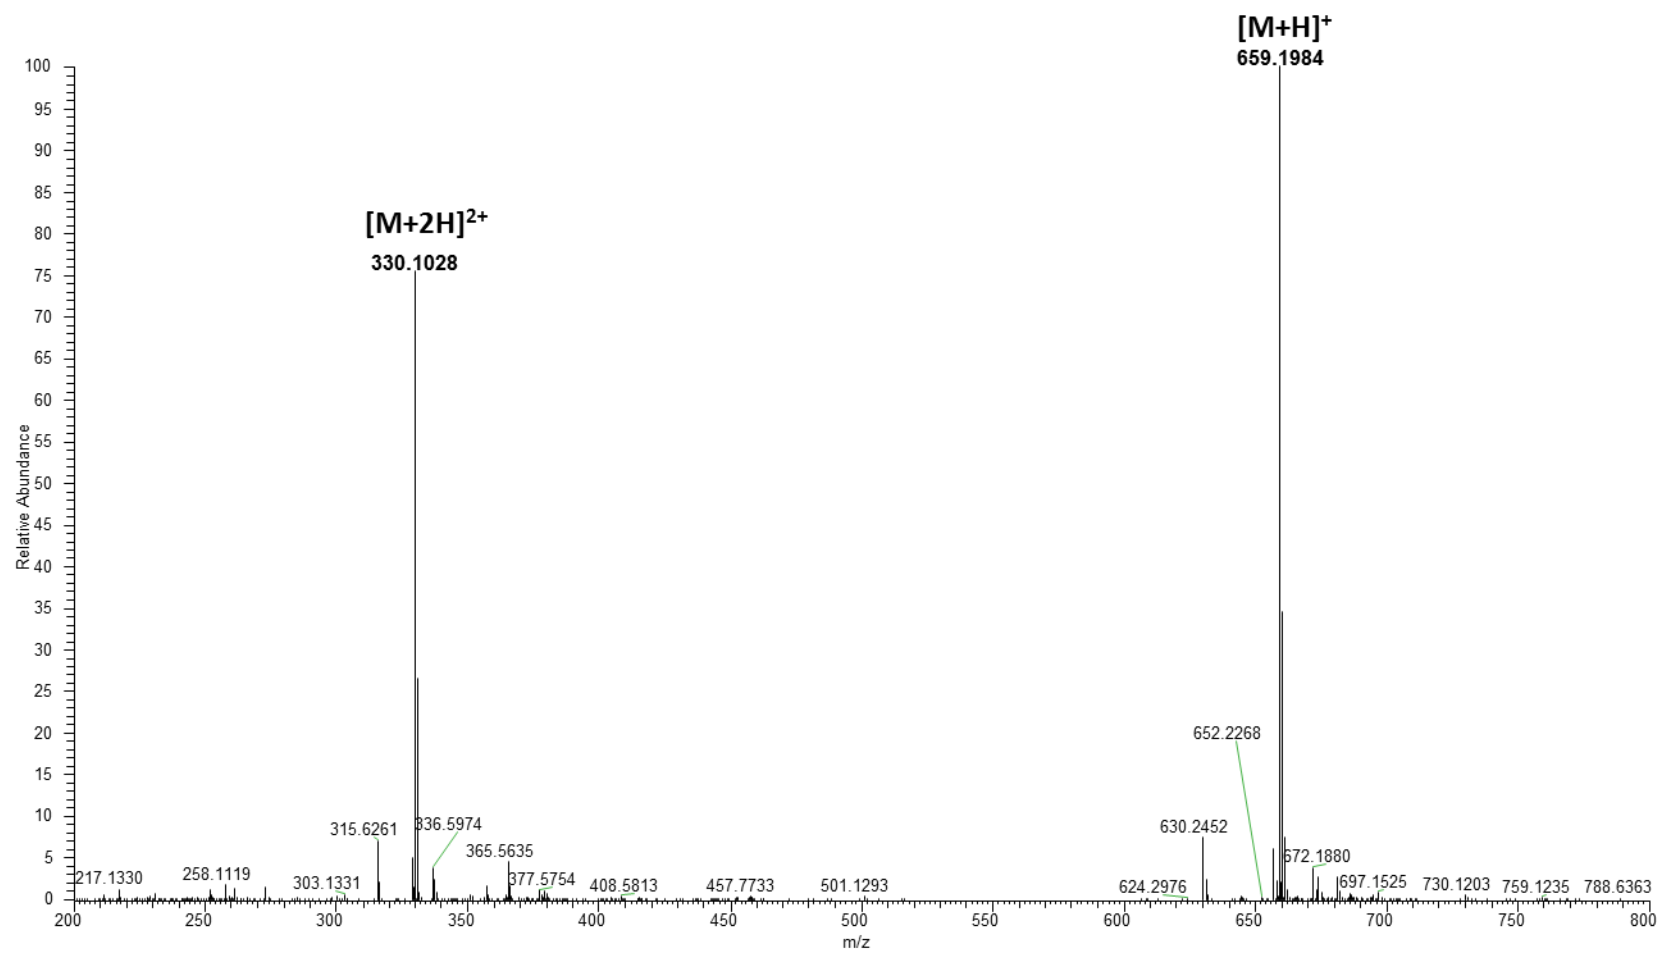

Figure S69. LC-HRESI-MS spectrum of Fe complex of **5**, positive mode.

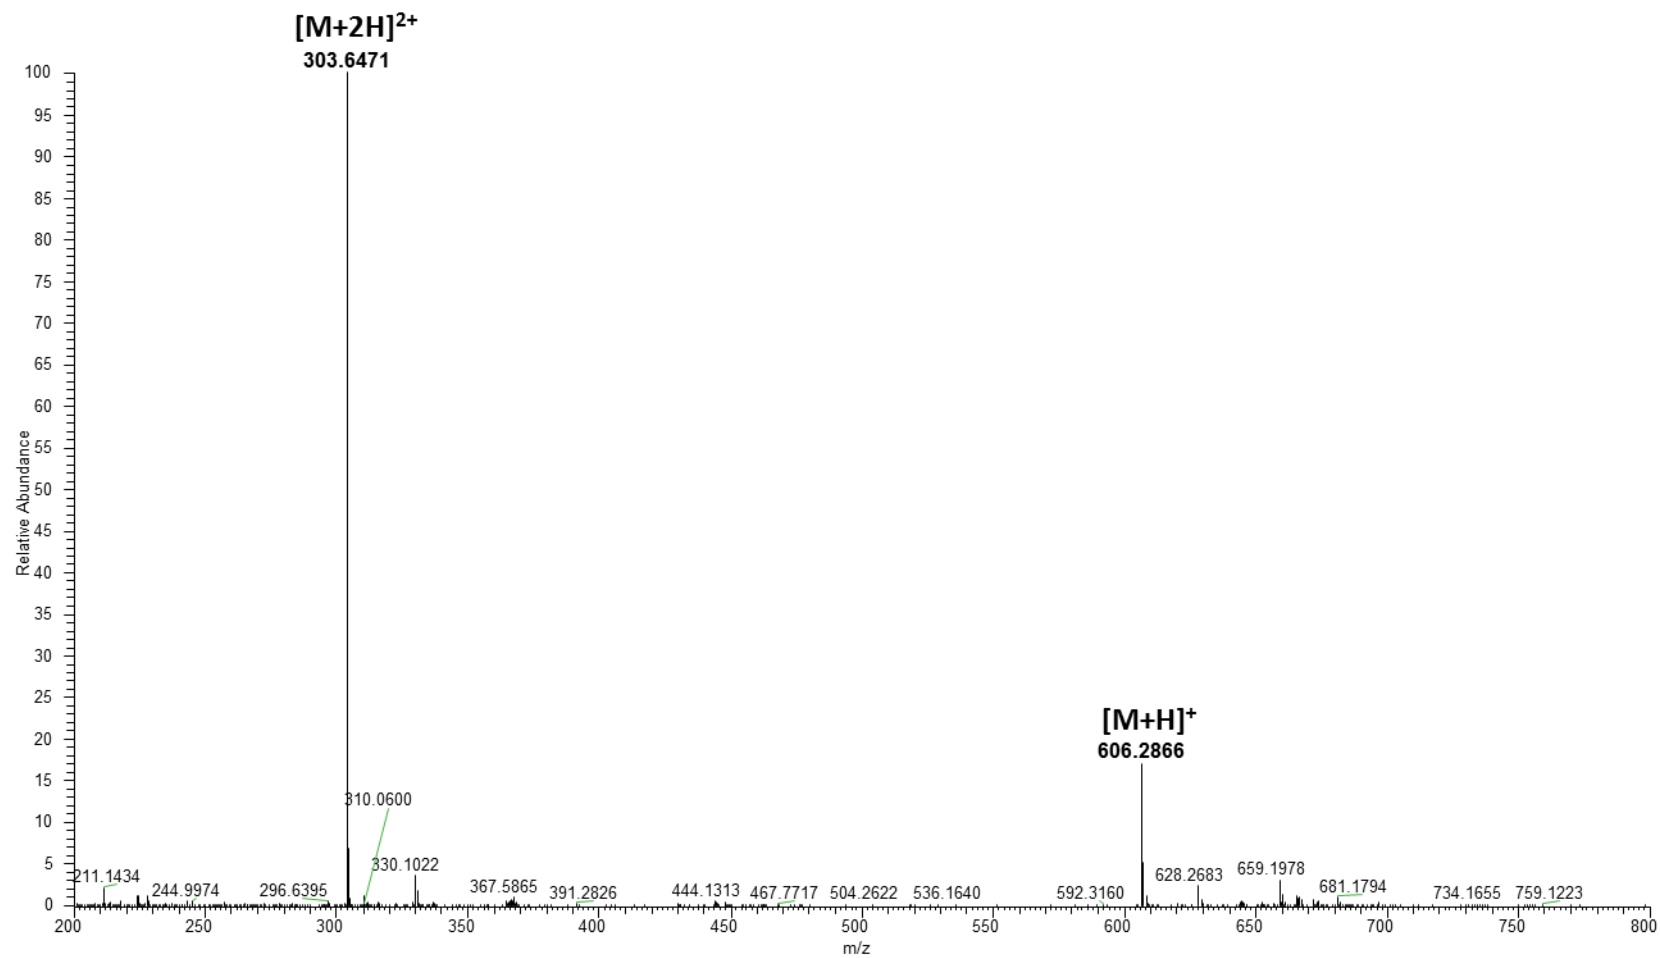

Figure S70. LC-HRESI-MS spectrum of apo form of **5**, positive mode.

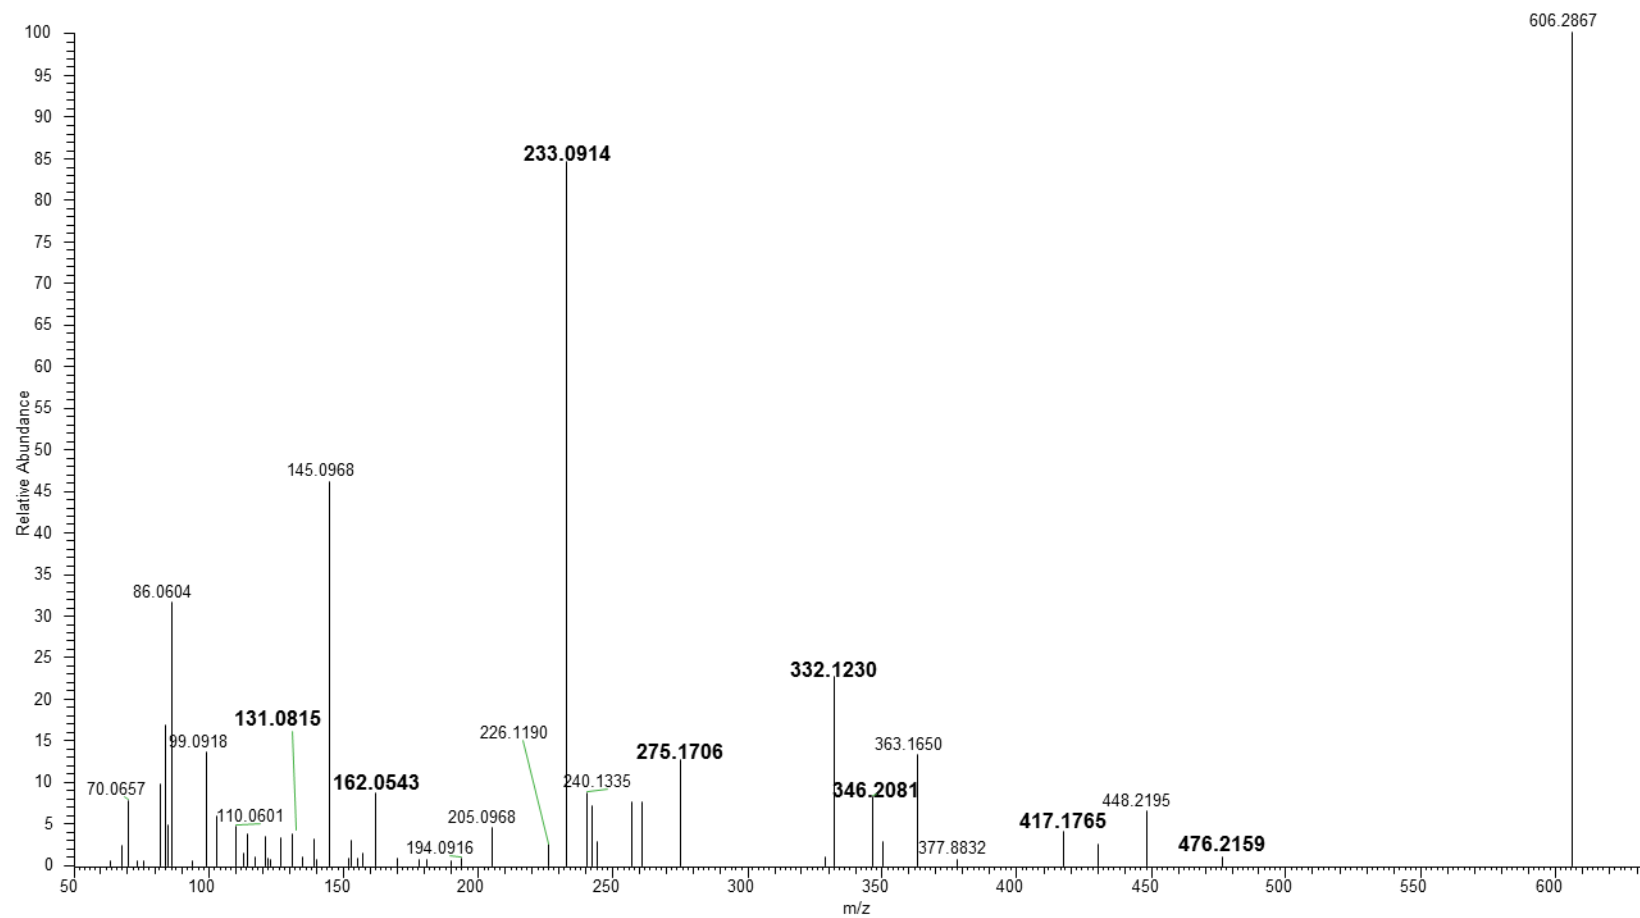

**Figure S71.** LC-HRESI-MS/MS spectrum of apo form of **5**, positive mode.

## 1) L-Ser

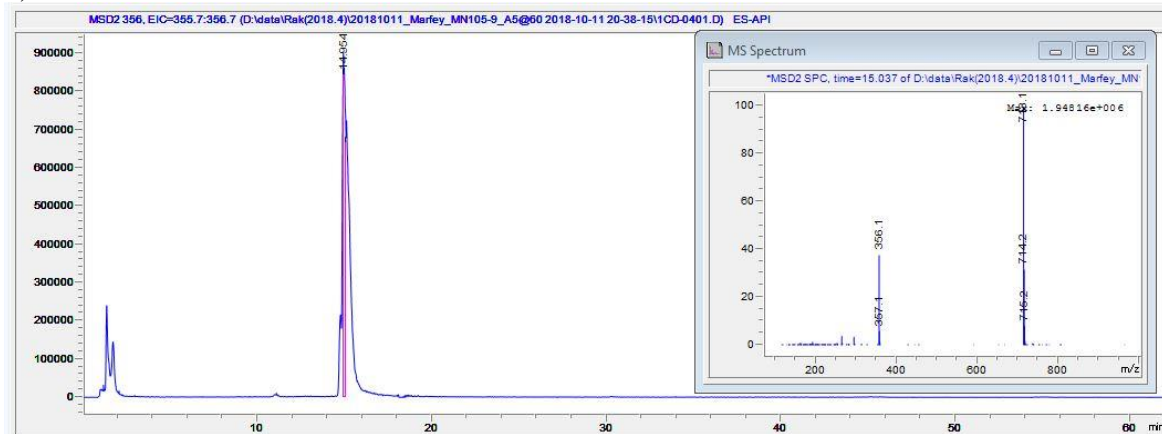

## 2) D-Ser

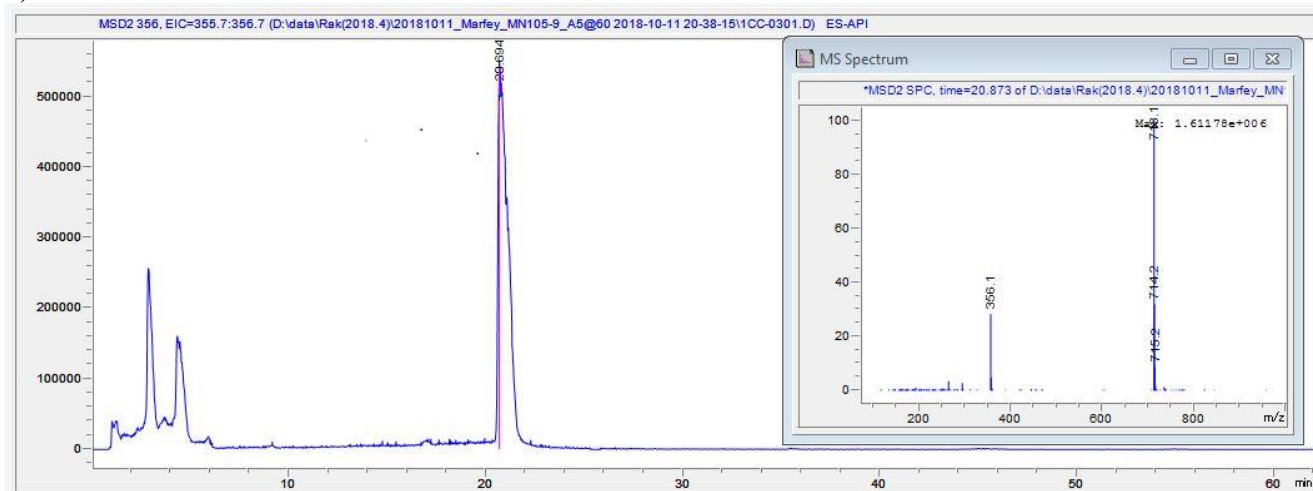

### 3) L-Ala

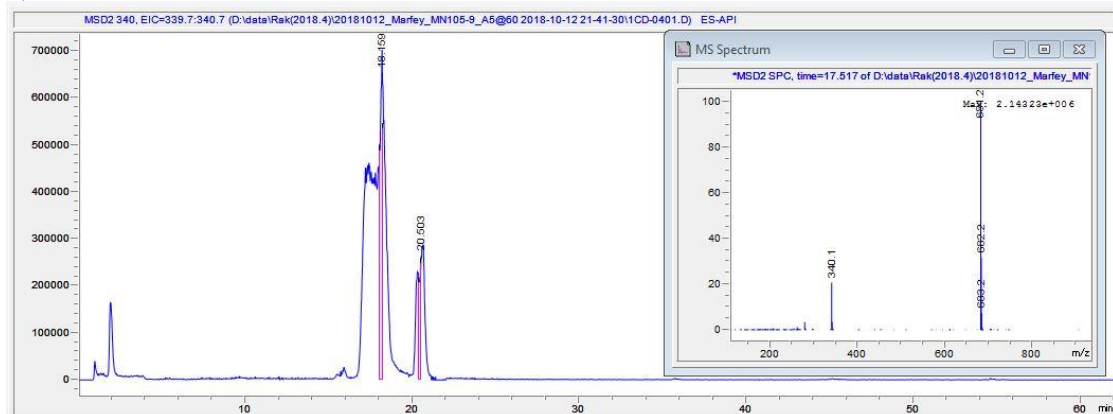

### 4) D-Ala

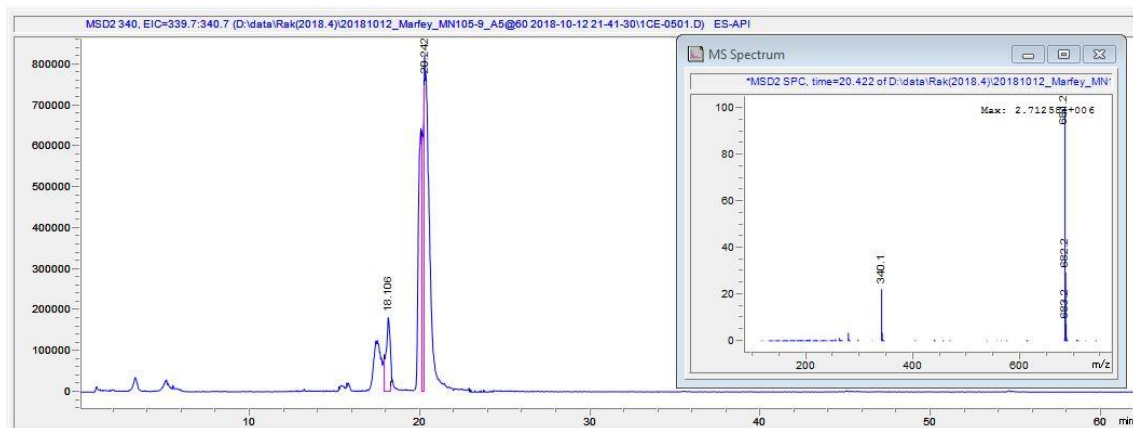

### 5) L-Orn

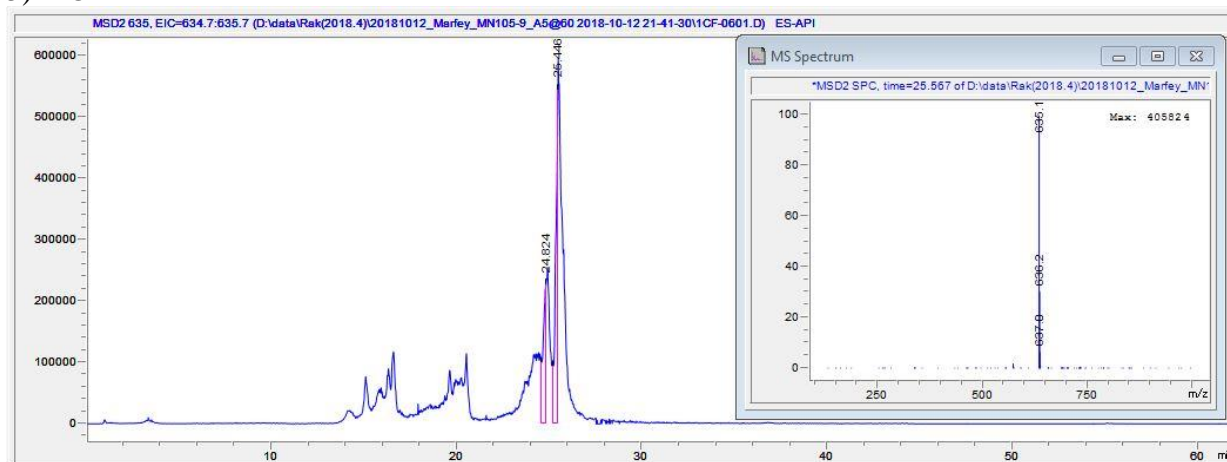

### 6) D-Orn

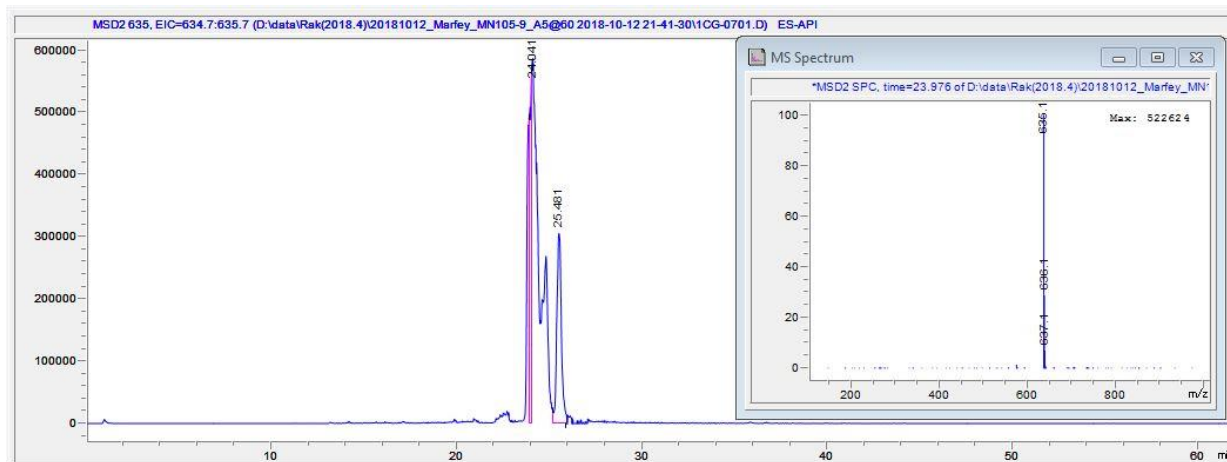

## 7) *N*-methyl-L-Orn

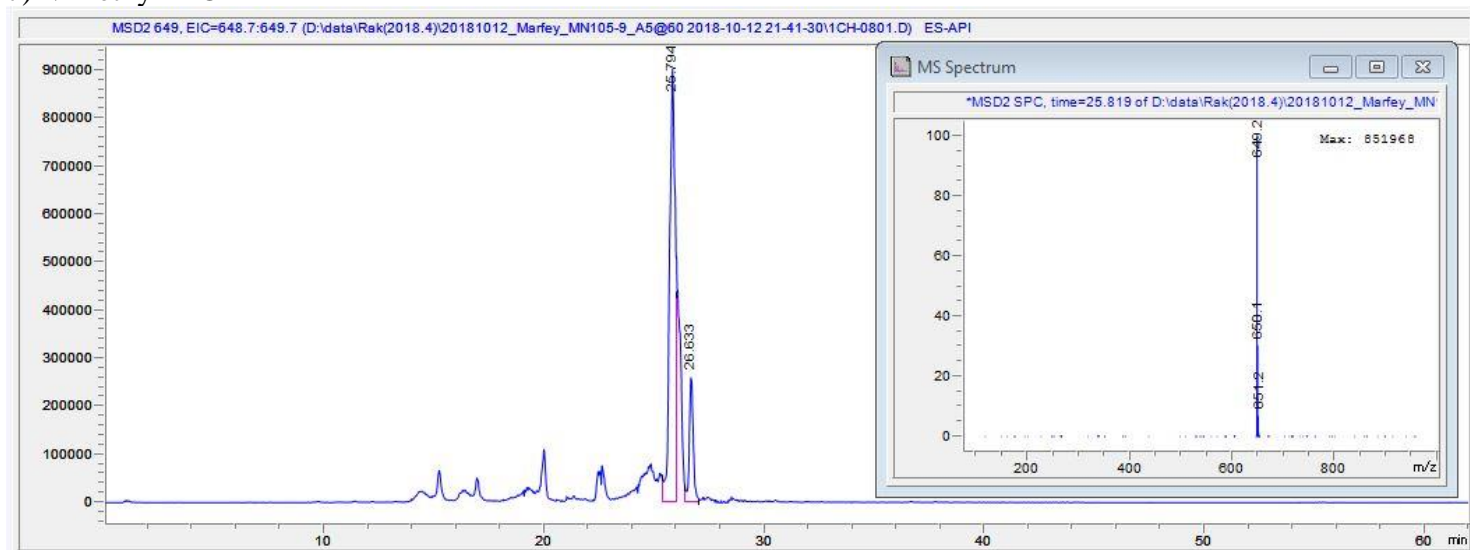

**Figure S72.** Retention times of the L-FDAA derivatized amino acids of standards

## 1) D-Ser

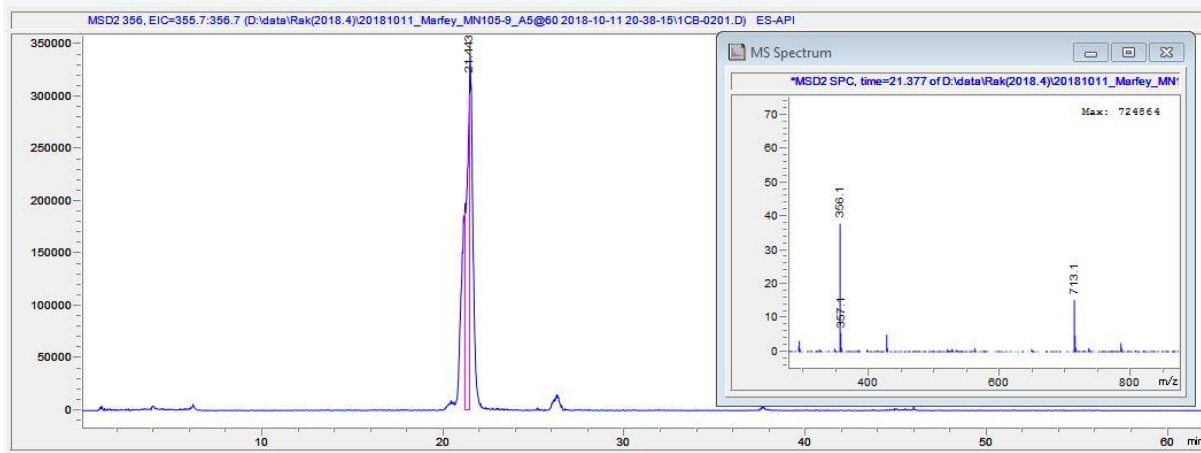

## 2) L-Ala

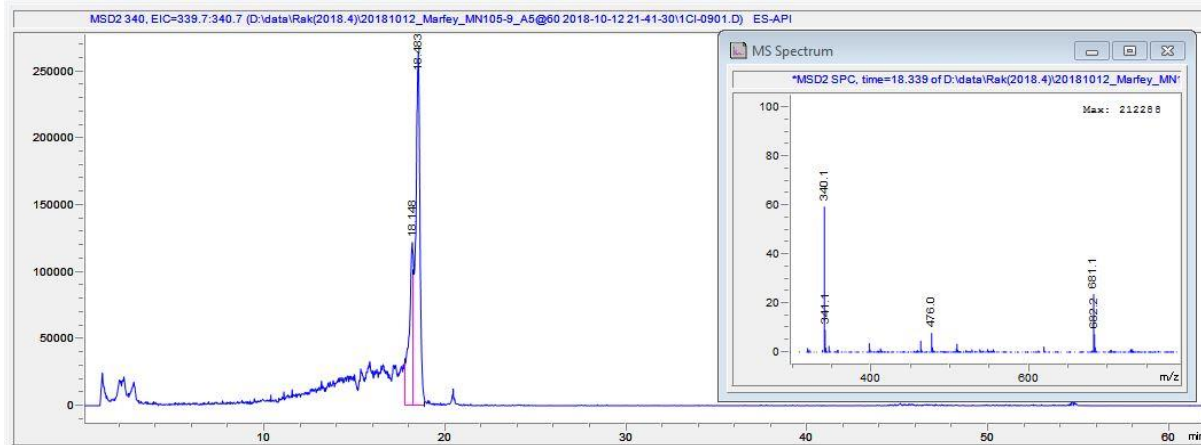



### 3) L-Orn

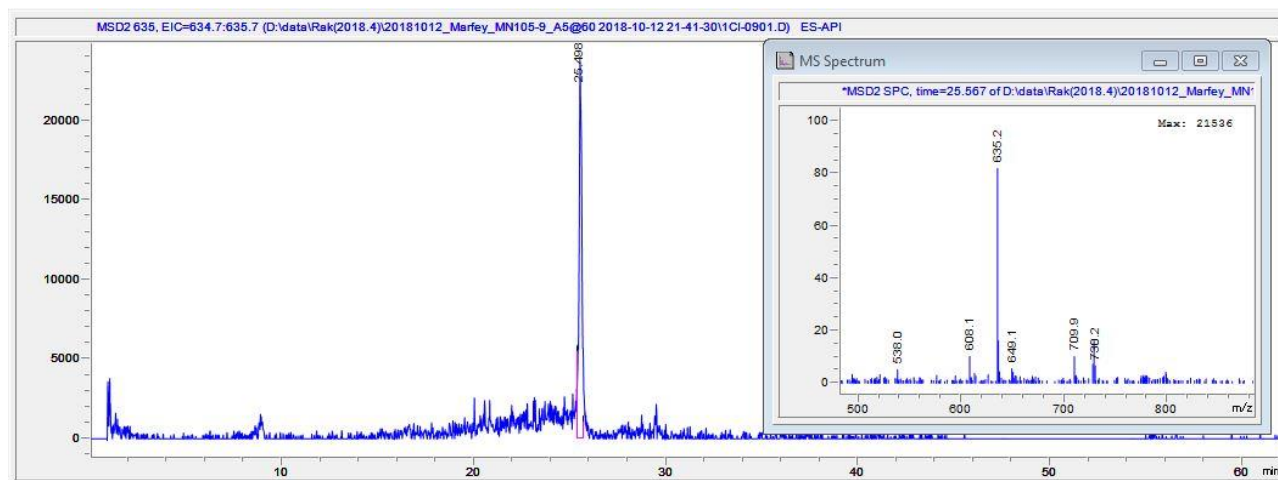

### 4) N-methyl-L-Orn

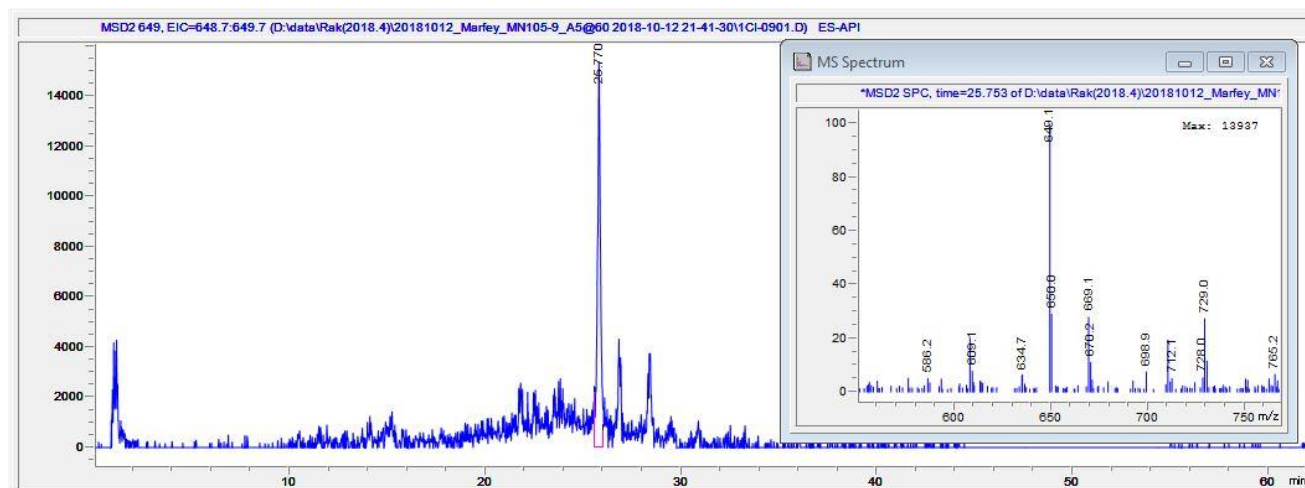

Figure S73. The retention times of the L-FDAA derivatized amino acids from compound 1

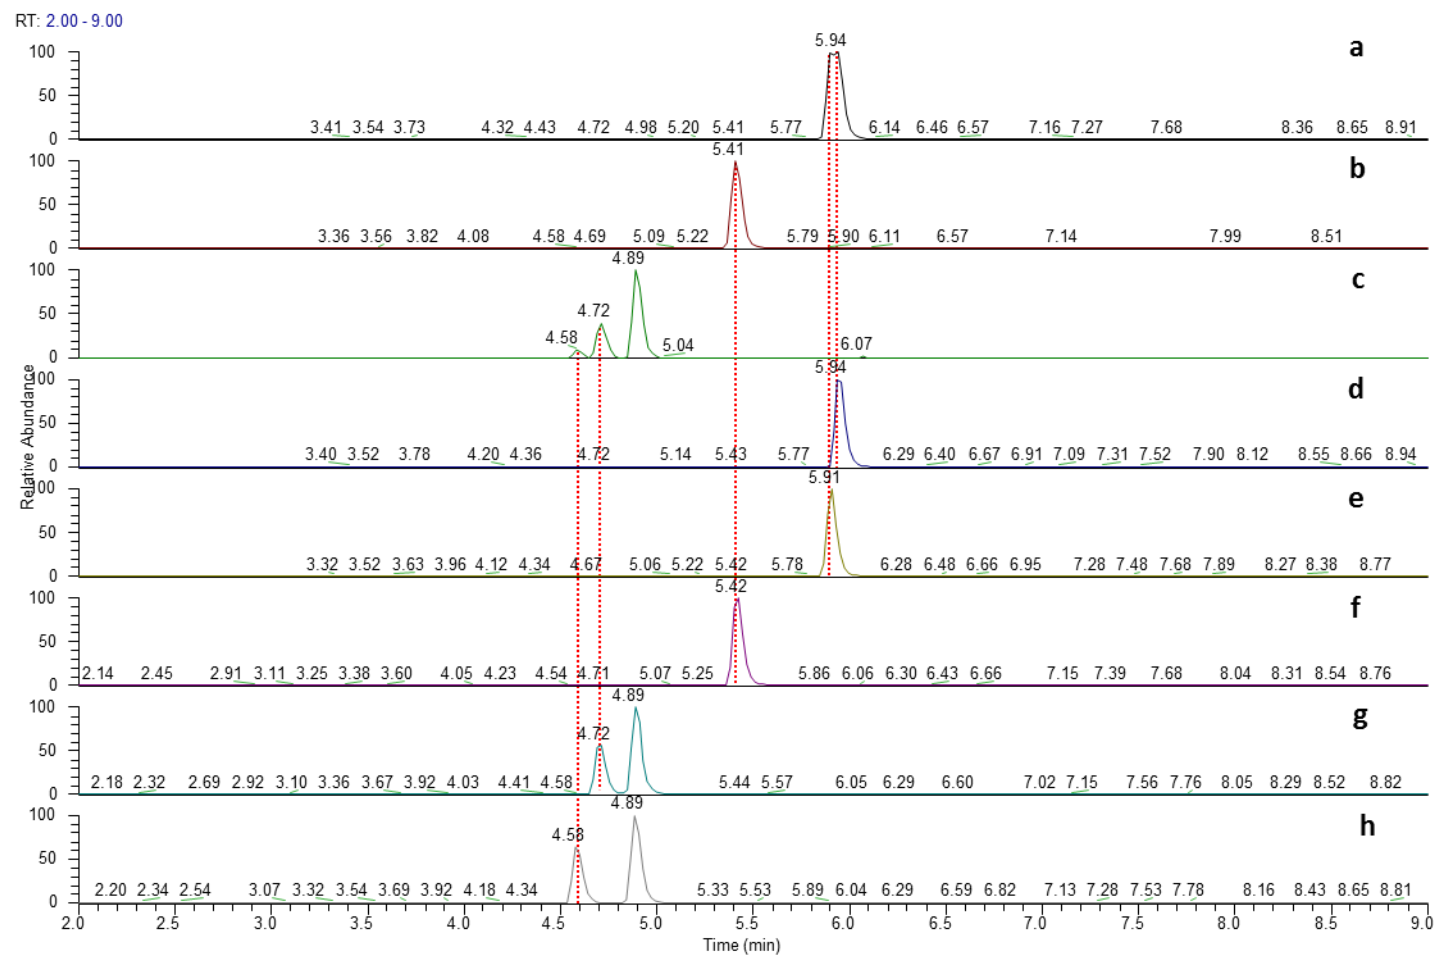

**Figure S74.** LC-HRESI(+)-MS chromatogram of **5** from Marfey's reaction. A) Extract ion count (EIC) mode of **5** under  $m/z$  342.1038; B) EIC of **5** for  $m/z$  358.0958; C) EIC of **5** for  $m/z$  385.1461; D) EIC of L-alanine for  $m/z$  342.1038; e) EIC of  $\beta$ -alanine for  $m/z$  342.1038; F) EIC of D-serine for  $m/z$  358.0987; G) EIC of L-ornithine for  $m/z$  385.1461; H) EIC of D-ornithine for  $m/z$  385.1461.

## 12. Computational analysis

### Determination of the absolute configuration of 2, 3, and 4 utilizing DP4+ probability analysis

All conformers proposed in this study were acquired through the MacroModel (version 2019-3, Schrödinger LLC) module with ‘mixed torsional/low mode sampling’ implemented with the MMFF94 force field. All searches were set initially in the gas phase with a 10 kJ/mol energy window limit and 10,000 maximum numbers of steps to thoroughly explore all potential conformers. The Polak-Ribiere conjugate gradient (PRCG) protocol was established with 10,000 maximum iterations and a 0.001 kJ (mol Å)<sup>-1</sup> convergence threshold on the rms gradient to minimize conformers. Conformers proposed in this study within 5 kJ/mol found in the MMFF force field were selected for geometry optimization by Tmolex 4.3.1 at B3LYP/6-31+G(d,p) level for DP4+ analysis. Geometrically optimized conformers for possible diastereomers were used for calculation of gauge-invariant atomic orbital (GIAO) magnetic shielding tensors at the B3-LYP/6-31+G(d,p) level. Chemical shift values were calculated from the magnetic shielding tensors using the equation where  $\delta$  is the calculated NMR chemical shift for nucleus  $x$ , and  $\sigma^o$  is the shielding tensor for the proton and carbon nuclei in tetramethylsilane calculated with the B3-LYP/6-31+G(d,p) basis set. DP4+ probability analysis was processed upon using an Excel sheet from Grimblat et al.

$$\delta_{calc}^x = \sigma^o - \sigma^x$$

**Reference** - Grimblat N, Zanardi MM, Sarotti AM. Beyond DP4: An Improved Probability for the Stereochemical Assignment of Isomeric Compounds using Quantum Chemical Calculations of NMR Shifts. *J. Org. Chem.* 2015, 80, 12526–12534. DOI: 10.1021/acs.joc.5b02396

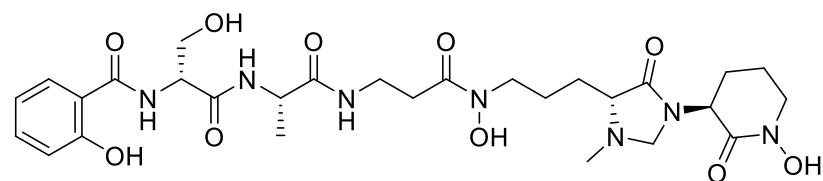

2a (isomer 1)

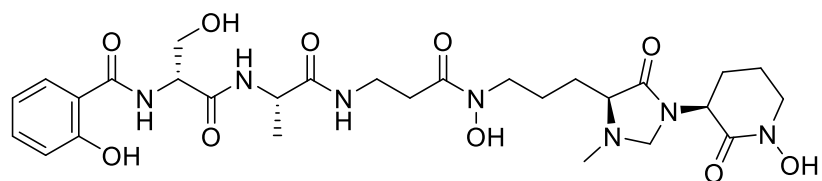

2b (isomer 2)

|    | A                 | B | C               | D        | E                | F        | G                   | H        |  |
|----|-------------------|---|-----------------|----------|------------------|----------|---------------------|----------|--|
| 1  | <b>Functional</b> |   | <b>Solvent?</b> |          | <b>Basis Set</b> |          | <b>Type of Data</b> |          |  |
| 2  | B3LYP             |   | PCM             |          | 6-31+G(d,p)      |          | Unscaled Shifts     |          |  |
| 3  |                   |   |                 |          |                  |          |                     |          |  |
| 4  |                   |   | Isomer 1        | Isomer 2 | Isomer 3         | Isomer 4 | Isomer 5            | Isomer 6 |  |
| 5  | sDP4+ (H data)    |   | 99.81%          | 0.19%    | -                | -        | -                   | -        |  |
| 6  | sDP4+ (C data)    |   | 94.86%          | 5.14%    | -                | -        | -                   | -        |  |
| 7  | sDP4+ (all data)  |   | 99.99%          | 0.01%    | -                | -        | -                   | -        |  |
| 8  | uDP4+ (H data)    |   | 100.00%         | 0.00%    | -                | -        | -                   | -        |  |
| 9  | uDP4+ (C data)    |   | 99.99%          | 0.01%    | -                | -        | -                   | -        |  |
| 10 | uDP4+ (all data)  |   | 100.00%         | 0.00%    | -                | -        | -                   | -        |  |
| 11 | DP4+ (H data)     |   | 100.00%         | 0.00%    | -                | -        | -                   | -        |  |
| 12 | DP4+ (C data)     |   | 100.00%         | 0.00%    | -                | -        | -                   | -        |  |
| 13 | DP4+ (all data)   |   | 100.00%         | 0.00%    | -                | -        | -                   | -        |  |

Figure S77. DP4+ probability analysis for the determination of the absolute configuration of **2**.

**Table S8.** Computationally calculated  $^1\text{H}$  and  $^{13}\text{C}$  chemical shifts of **2a** and **2b** by utilizing computational analysis.

| $^{13}\text{C}$ |                 |       |           |           | $^1\text{H}$ |                 |      |           |           |
|-----------------|-----------------|-------|-----------|-----------|--------------|-----------------|------|-----------|-----------|
| Number          | Carbon Position | Exp.  | Cal. (2a) | Cal. (2b) | Number       | Carbon Position | Exp. | Cal. (2a) | Cal. (2b) |
| 2               | 7               | 169.9 | 165.2728  | 163.4656  | 46           | 8               | 4.59 | 5.074306  | 5.345409  |
| 4               | 8               | 57.1  | 55.20058  | 59.42911  | 47           | 11              | 4.33 | 4.800245  | 4.74795   |
| 5               | 9               | 62.6  | 63.97466  | 65.75498  | 48           | 20              | 3.05 | 2.974075  | 3.36041   |
| 7               | 10              | 172.5 | 161.1361  | 163.3842  | 49           | 23              | 4.66 | 4.610292  | 5.468065  |
| 9               | 11              | 50.5  | 48.68818  | 49.37156  | 51           | 9               | 3.89 | 3.752492  | 4.469758  |
| 10              | 12              | 17.4  | 13.99346  | 13.50855  | 52           | 9               | 3.94 | 5.202133  | 4.543015  |
| 11              | 13              | 174.5 | 163.7526  | 167.197   | 55           | 12              | 1.37 | 1.294229  | 1.544476  |
| 13              | 14              | 36.1  | 37.25645  | 37.43815  | 56           | 12              | 1.37 | 2.063354  | 2.013605  |
| 14              | 15              | 32.6  | 29.64457  | 35.283    | 57           | 12              | 1.37 | 1.454928  | 1.364429  |
| 15              | 16              | 173.3 | 161.9423  | 163.3026  | 59           | 14              | 3.45 | 3.910041  | 4.32409   |
| 17              | 17              | 48.4  | 50.80929  | 49.96521  | 60           | 14              | 3.45 | 3.464107  | 3.369902  |
| 18              | 18              | 22.8  | 25.60947  | 22.22457  | 61           | 15              | 2.7  | 3.920363  | 2.675825  |
| 19              | 19              | 25.8  | 30.43759  | 29.36288  | 62           | 15              | 2.7  | 2.114761  | 3.646223  |
| 20              | 20              | 67.1  | 67.11923  | 64.57762  | 63           | 17              | 3.57 | 3.798672  | 4.49381   |
| 21              | 21              | 175.6 | 167.5696  | 166.7402  | 64           | 17              | 3.61 | 3.884172  | 3.122189  |
| 23              | 23              | 52.4  | 51.76685  | 49.71993  | 65           | 18              | 1.78 | 2.870353  | 1.834152  |
| 24              | 22              | 164.7 | 158.526   | 154.929   | 66           | 18              | 1.78 | 1.517401  | 2.36329   |
| 27              | 26              | 52    | 50.31306  | 46.96174  | 67           | 19              | 1.96 | 1.911056  | 2.036638  |
| 28              | 25              | 21.7  | 21.68292  | 20.26947  | 68           | 19              | 1.96 | 2.977445  | 1.402546  |
| 29              | 24              | 29.1  | 24.84744  | 24.58044  | 70           | 26              | 3.58 | 3.799027  | 3.933583  |
| 33              | 2'              | 68    | 65.81639  | 65.06898  | 71           | 26              | 3.65 | 3.98868   | 4.096239  |
| 34              | 1'              | 39.8  | 41.81052  | 35.8639   | 72           | 25              | 2.02 | 2.561105  | 3.118378  |
| 39              | 6               | 110.8 | 110.9555  | 112.3856  | 73           | 25              | 2.06 | 2.141459  | 2.355353  |
| 40              | 5               | 159.9 | 155.1464  | 153.6029  | 74           | 24              | 1.93 | 2.033508  | 2.866865  |
| 42              | 4               | 117.9 | 111.9297  | 111.5217  | 75           | 24              | 2.32 | 2.024047  | 1.950064  |
| 43              | 3               | 134.6 | 128.6401  | 126.2888  | 76           | 2'              | 3.77 | 3.922784  | 4.334645  |
| 44              | 2               | 120.1 | 113.2392  | 111.6818  | 77           | 2'              | 4.34 | 5.209335  | 4.383168  |
| 45              | 1               | 130   | 122.8229  | 124.5964  | 78           | 1'              | 2.41 | 2.959558  | 2.525204  |
|                 |                 |       |           |           | 79           | 1'              | 2.41 | 2.696261  | 2.335418  |
|                 |                 |       |           |           | 80           | 1'              | 2.41 | 2.681286  | 2.778556  |
|                 |                 |       |           |           | 83           | 4               | 6.93 | 7.458973  | 7.40061   |
|                 |                 |       |           |           | 84           | 3               | 7.39 | 7.987773  | 7.817887  |
|                 |                 |       |           |           | 85           | 2               | 6.92 | 7.464603  | 7.287848  |
|                 |                 |       |           |           | 86           | 1               | 7.91 | 8.51591   | 9.054206  |

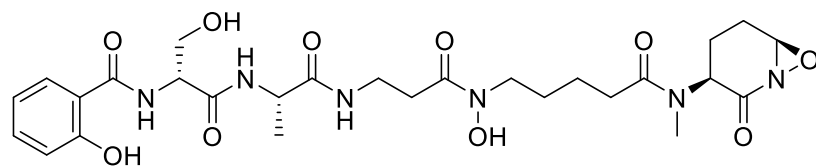

3a (isomer 1)

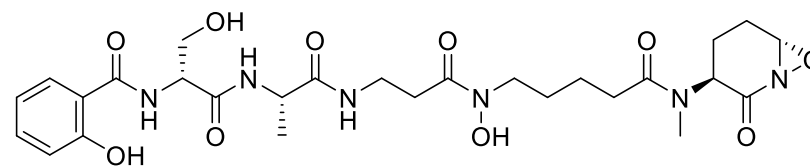

3b (isomer 2)

|    | A                | B       | C        | D        | E           | F        | G               | H        |
|----|------------------|---------|----------|----------|-------------|----------|-----------------|----------|
| 1  | Functional       |         | Solvent? |          | Basis Set   |          | Type of Data    |          |
| 2  | B3LYP            |         | PCM      |          | 6-31+G(d,p) |          | Unscaled Shifts |          |
| 3  |                  |         |          |          |             |          |                 |          |
| 4  |                  |         | Isomer 1 | Isomer 2 | Isomer 3    | Isomer 4 | Isomer 5        | Isomer 6 |
| 5  | sDP4+ (H data)   | 99.81%  | 0.19%    | -        | -           | -        | -               | -        |
| 6  | sDP4+ (C data)   | 94.86%  | 5.14%    | -        | -           | -        | -               | -        |
| 7  | sDP4+ (all data) | 99.99%  | 0.01%    | -        | -           | -        | -               | -        |
| 8  | uDP4+ (H data)   | 100.00% | 0.00%    | -        | -           | -        | -               | -        |
| 9  | uDP4+ (C data)   | 99.99%  | 0.01%    | -        | -           | -        | -               | -        |
| 10 | uDP4+ (all data) | 100.00% | 0.00%    | -        | -           | -        | -               | -        |
| 11 | DP4+ (H data)    | 100.00% | 0.00%    | -        | -           | -        | -               | -        |
| 12 | DP4+ (C data)    | 100.00% | 0.00%    | -        | -           | -        | -               | -        |
| 13 | DP4+ (all data)  | 100.00% | 0.00%    | -        | -           | -        | -               | -        |

Figure S78. DP4+ probability analysis for the determination of the absolute configuration of **3**.

**Table S9.** Computationally calculated  $^1\text{H}$  and  $^{13}\text{C}$  chemical shifts of **3a** and **3b**.

| $^{13}\text{C}$ |                 |       |           |           | $^1\text{H}$ |                 |      |           |           |
|-----------------|-----------------|-------|-----------|-----------|--------------|-----------------|------|-----------|-----------|
| Number          | Carbon Position | Exp.  | Cal. (3a) | Cal. (3b) | Number       | Carbon Position | Exp. | Cal. (3a) | Cal. (3b) |
| 2               | 7               | 170   | 160.5903  | 160.5234  | 44           | 8               | 4.59 | 4.631003  | 4.820117  |
| 4               | 8               | 57.1  | 62.86777  | 53.03642  | 45           | 11              | 4.34 | 4.833402  | 4.596502  |
| 5               | 9               | 62.7  | 65.91441  | 61.59993  | 46           | 23              | 4.21 | 5.975929  | 3.868249  |
| 7               | 10              | 172.7 | 164.5502  | 168.001   | 47           | 26              | 5.75 | 4.851111  | 4.913251  |
| 9               | 11              | 50.5  | 49.03761  | 49.81175  | 49           | 9               | 3.88 | 4.550162  | 4.735255  |
| 10              | 12              | 17.5  | 13.76205  | 13.88643  | 50           | 9               | 3.92 | 4.153045  | 3.957464  |
| 11              | 13              | 174.7 | 167.78313 | 160.0837  | 53           | 12              | 1.37 | 1.503121  | 1.338947  |
| 13              | 14              | 36.2  | 37.437905 | 34.19106  | 54           | 12              | 1.37 | 1.662706  | 2.094933  |
| 14              | 15              | 32.7  | 38.06332  | 32.98501  | 55           | 12              | 1.37 | 2.187544  | 1.400099  |
| 15              | 16              | 173.7 | 164.5221  | 159.5322  | 57           | 14              | 3.45 | 3.346108  | 3.347411  |
| 17              | 17              | 48.1  | 46.21344  | 47.30333  | 58           | 14              | 3.45 | 4.758935  | 4.465732  |
| 18              | 18              | 21.3  | 26.34591  | 26.96609  | 59           | 15              | 2.69 | 3.187704  | 2.384879  |
| 19              | 19              | 26.6  | 22.825104 | 21.32364  | 60           | 15              | 2.69 | 3.074812  | 3.076843  |
| 20              | 20              | 36.7  | 32.74787  | 32.47453  | 61           | 17              | 3.54 | 3.390861  | 4.257409  |
| 21              | 21              | 168.9 | 167.011   | 169.5919  | 62           | 17              | 3.59 | 4.681018  | 3.907527  |
| 23              | 1'              | 31.2  | 30.88223  | 35.93094  | 63           | 18              | 1.37 | 2.452509  | 2.539811  |
| 24              | 23              | 62.2  | 55.56439  | 63.08499  | 64           | 18              | 1.42 | 1.54178   | 2.054973  |
| 25              | 22              | 165.1 | 180.4103  | 184.4774  | 65           | 19              | 1.59 | 2.006431  | 2.071863  |
| 28              | 26              | 82    | 75.167104 | 83.79448  | 66           | 19              | 1.59 | 1.904742  | 2.74923   |
| 29              | 25              | 29.5  | 23.92746  | 22.4573   | 67           | 20              | 2.21 | 2.834107  | 2.852999  |
| 30              | 24              | 27.3  | 19.53747  | 25.70477  | 68           | 20              | 2.21 | 2.406359  | 3.543028  |
| 37              | 6               | 110.8 | 118.5147  | 114.9216  | 69           | 1'              | 2.94 | 2.878543  | 3.536832  |
| 38              | 5               | 160.1 | 149.5373  | 148.8029  | 70           | 1'              | 2.94 | 3.765719  | 3.361618  |
| 40              | 4               | 118   | 116.2586  | 111.5684  | 71           | 1'              | 2.94 | 2.901278  | 2.900082  |
| 41              | 3               | 134.7 | 125.7791  | 126.9738  | 72           | 25              | 1.76 | 3.655556  | 3.172215  |
| 42              | 2               | 120.1 | 115.0363  | 113.3307  | 73           | 25              | 2.37 | 2.758331  | 2.856274  |
| 43              | 1               | 130.1 | 126.2527  | 126.9063  | 74           | 24              | 1.96 | 2.095066  | 2.25103   |
|                 |                 |       |           |           | 75           | 24              | 2.11 | 2.650822  | 2.778286  |
|                 |                 |       |           |           | 78           | 4               | 6.93 | 7.467884  | 7.229921  |
|                 |                 |       |           |           | 79           | 3               | 7.39 | 7.8578    | 7.956974  |
|                 |                 |       |           |           | 80           | 2               | 6.92 | 7.551378  | 7.491198  |
|                 |                 |       |           |           | 81           | 1               | 7.9  | 8.798749  | 8.717146  |

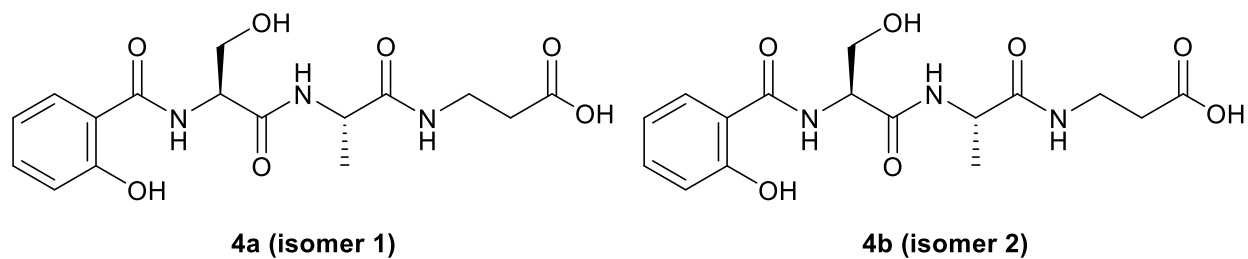

|    | A                 | B | C               | D        | E                | F        | G                   | H        |   |
|----|-------------------|---|-----------------|----------|------------------|----------|---------------------|----------|---|
| 1  | <b>Functional</b> |   | <b>Solvent?</b> |          | <b>Basis Set</b> |          | <b>Type of Data</b> |          |   |
| 2  | B3LYP             |   | PCM             |          | 6-31G(d,p)       |          | Unscaled Shifts     |          |   |
| 3  |                   |   |                 |          |                  |          |                     |          |   |
| 4  |                   |   | Isomer 1        | Isomer 2 | Isomer 3         | Isomer 4 | Isomer 5            | Isomer 6 |   |
| 5  | sDP4+ (H data)    |   | 0.00%           |          | 100.00%          | -        | -                   | -        | - |
| 6  | sDP4+ (C data)    |   | 3.96%           |          | 96.04%           | -        | -                   | -        | - |
| 7  | sDP4+ (all data)  |   | 0.00%           |          | 100.00%          | -        | -                   | -        | - |
| 8  | uDP4+ (H data)    |   | 0.11%           |          | 99.89%           | -        | -                   | -        | - |
| 9  | uDP4+ (C data)    |   | 95.49%          |          | 4.51%            | -        | -                   | -        | - |
| 10 | uDP4+ (all data)  |   | 2.34%           |          | 97.66%           | -        | -                   | -        | - |
| 11 | DP4+ (H data)     |   | 0.00%           |          | 100.00%          | -        | -                   | -        | - |
| 12 | DP4+ (C data)     |   | 46.56%          |          | 53.44%           | -        | -                   | -        | - |
| 13 | DP4+ (all data)   |   | 0.00%           |          | 100.00%          | -        | -                   | -        | - |

**Figure S79.** DP4+ probability analysis for the determination of the absolute configuration of **4**.



**Table S10.** Computationally calculated  $^1\text{H}$  and  $^{13}\text{C}$  chemical shifts of **4a** and **4b**.

| $^{13}\text{C}$ |                 |       |             |             |        |                 |      |             | $^1\text{H}$ |  |  |
|-----------------|-----------------|-------|-------------|-------------|--------|-----------------|------|-------------|--------------|--|--|
| Number          | Carbon Position | Exp.  | Cal. (4a)   | Cal. (4b)   | Number | Carbon Position | Exp. | Cal. (4a)   | Cal. (4b)    |  |  |
| 2               | 7               | 170.1 | 165.0521229 | 164.6196408 | 27     | 8               | 4.58 | 4.794934191 | 5.111637643  |  |  |
| 4               | 8               | 57.2  | 50.79478112 | 51.40460449 | 28     | 11              | 4.36 | 3.672143863 | 4.796459595  |  |  |
| 5               | 9               | 62.7  | 63.5122637  | 64.00086012 | 30     | 9               | 3.95 | 4.900170362 | 4.181258205  |  |  |
| 7               | 10              | 172.4 | 166.9900025 | 166.2295643 | 31     | 9               | 3.9  | 4.197322552 | 4.956484969  |  |  |
| 9               | 11              | 50.4  | 53.44984272 | 48.53496608 | 34     | 12              | 1.36 | 2.400512666 | 1.904480416  |  |  |
| 10              | 12              | 17.6  | 14.40003394 | 13.68094842 | 35     | 12              | 1.36 | 2.081014771 | 1.41775361   |  |  |
| 11              | 13              | 174.6 | 159.8779278 | 160.7404168 | 36     | 12              | 1.36 | 1.373678608 | 1.585012052  |  |  |
| 13              | 14              | 36.6  | 34.95607177 | 36.35813935 | 38     | 14              | 3.4  | 4.139687081 | 3.402398351  |  |  |
| 14              | 15              | 35.5  | 32.74167797 | 33.38552828 | 39     | 14              | 3.43 | 3.263340774 | 4.166260892  |  |  |
| 15              | 16              | 176.6 | 168.9366612 | 166.6856974 | 40     | 15              | 2.46 | 2.606371402 | 2.587448452  |  |  |
| 20              | 6               | 110.9 | 107.23349   | 107.2987511 | 41     | 15              | 2.46 | 3.162121711 | 3.165058852  |  |  |
| 21              | 5               | 160   | 157.8409407 | 157.8379895 | 44     | 4               | 6.93 | 7.420027649 | 7.396021335  |  |  |
| 23              | 4               | 117.9 | 112.2566452 | 112.2877593 | 45     | 3               | 7.39 | 7.917815776 | 7.873104799  |  |  |
| 24              | 3               | 134.7 | 128.2718912 | 128.0896635 | 46     | 2               | 6.92 | 7.285074126 | 7.246656355  |  |  |
| 25              | 2               | 120.1 | 110.7142363 | 110.7422293 | 47     | 1               | 7.9  | 7.285074126 | 8.342464317  |  |  |
| 26              | 1               | 130   | 121.9311209 | 121.2402818 |        |                 |      |             |              |  |  |

### 13. Bioactivities

*C. neoformans* strains used in the current study were described in the previous studies.<sup>3,4</sup> All strains were cultured in yeast extract, bacto peptone with glucose (YPD; Biopure) or low-iron medium (LIM). For siderophore assay, *C. neoformans* cells were inoculated in 3 ml YPD broth and incubated for overnight at 30 °C. Cells were pelleted and washed twice with iron-chelated phosphate buffered saline (PBS) and resuspended in LIM. Cells were incubated at 30 °C for overnight, pelleted, and washed twice using chelated PBS. Cells were resuspended in PBS. Total  $2.0 \times 10^5$  cells were inoculated either in 200  $\mu$ l of LIM, or in 200  $\mu$ l of media containing iron-free or iron-loaded compound. Cells were grown for 36 hours at 30 °C, 5  $\mu$ l of them were spotted on YPD agar medium, incubated for 24 hours at 30°, and photographs were taken. Each compound was mixed with FeCl<sub>3</sub> in a 1:0.9 molar ratio to prepare the iron-loaded form,<sup>5,6</sup> and added to LIM at a final concentration of 10  $\mu$ M. Ferroxamine was used as a siderophore reference (positive control).

Antifungal activity of each compound was evaluated by determination of minimum inhibitory concentration (MIC) following Clinical and Laboratory Standards Institute (CLSI) guideline.<sup>7</sup> Cell viability was measured by spreading cultured from the 96 well-plate containing different concentrations of the compound and counting colony-forming unit (CFU).

#### 14. Biosynthetic Pathway Analysis and Construction of phylogenetic trees

Amino Acid sequences were aligned using ClustalW<sup>8</sup> and the phylogenetic tree was built with Fasttree<sup>9</sup> 2 via the bioinformatics platform Galaxy.<sup>10</sup> The amino acid sequences of the A and the C Domains of Actinobacteria were retrieved from the antiSMASH database.<sup>11</sup> We used the sequences for A-Domains with a specificity for all proteinogenic amino acids as well as the unnatural amino acids ornithine, D-ornithine, n-methyl ornithine, and beta alanine. For the C-domains we used C-Domains to every currently known class of C-Domain. The phylogenetic trees were visualized using iTOL.<sup>12</sup>

**Table S11.** Comparison of adenylation domain active side residues extracted by NRPSPredictor 2<sup>13</sup> based on Amino acid sequences from known NRPS's.

| <b>A domain</b>              | <b>Active side residues<sup>a</sup></b> | <b>Substrate</b> | <b>Accession number</b> |
|------------------------------|-----------------------------------------|------------------|-------------------------|
| ReneL_A2                     | DILQIGMVYK                              |                  |                         |
| Swb16 (SW-163C)              | DILQITLVYK                              | Gly/Ala          | BAI63288                |
| Ecm6 (echinomycin)           | DILQITLVYK                              |                  | BAE98155                |
| Mad31_A1 (madurastatin D)    | DILQLGM/WK                              | Gly              | WP_141576257            |
| ReneL_A3                     | IDTTISLGDK                              |                  |                         |
| Mad31_A2_(madurastatin D)    | IDTTISLGDK                              | $\beta$ -ala     | WP_141576257            |
| CahD_A1 (Cahuitamycin)       | IDVTISLADK                              |                  | AMK48228.1              |
| BlmIV (Bleomycin)            | VDWVLSLADK                              |                  | AAG02364                |
| ReneL_A3                     | DMENLGLINK                              |                  |                         |
| Mad31_A3_(madurastatin D)    | DMENLGLINK                              | Orn              | WP_141576257            |
| AMYAL_RS0130210 (Albachelin) | DMENLGLINK                              |                  | WP_084702182            |
| ReneQ_A1                     | DLFNLGLIHK                              |                  |                         |
| Mad63 (madurastatin D)       | DLFNLGLIHK                              | Cys/Ser          | WP_141576286            |
| GobJ (Gobichelin)            | DLFNLGLIHK                              |                  | AGE11891                |

<sup>a</sup>Major variation in Bold, minor variation in italics

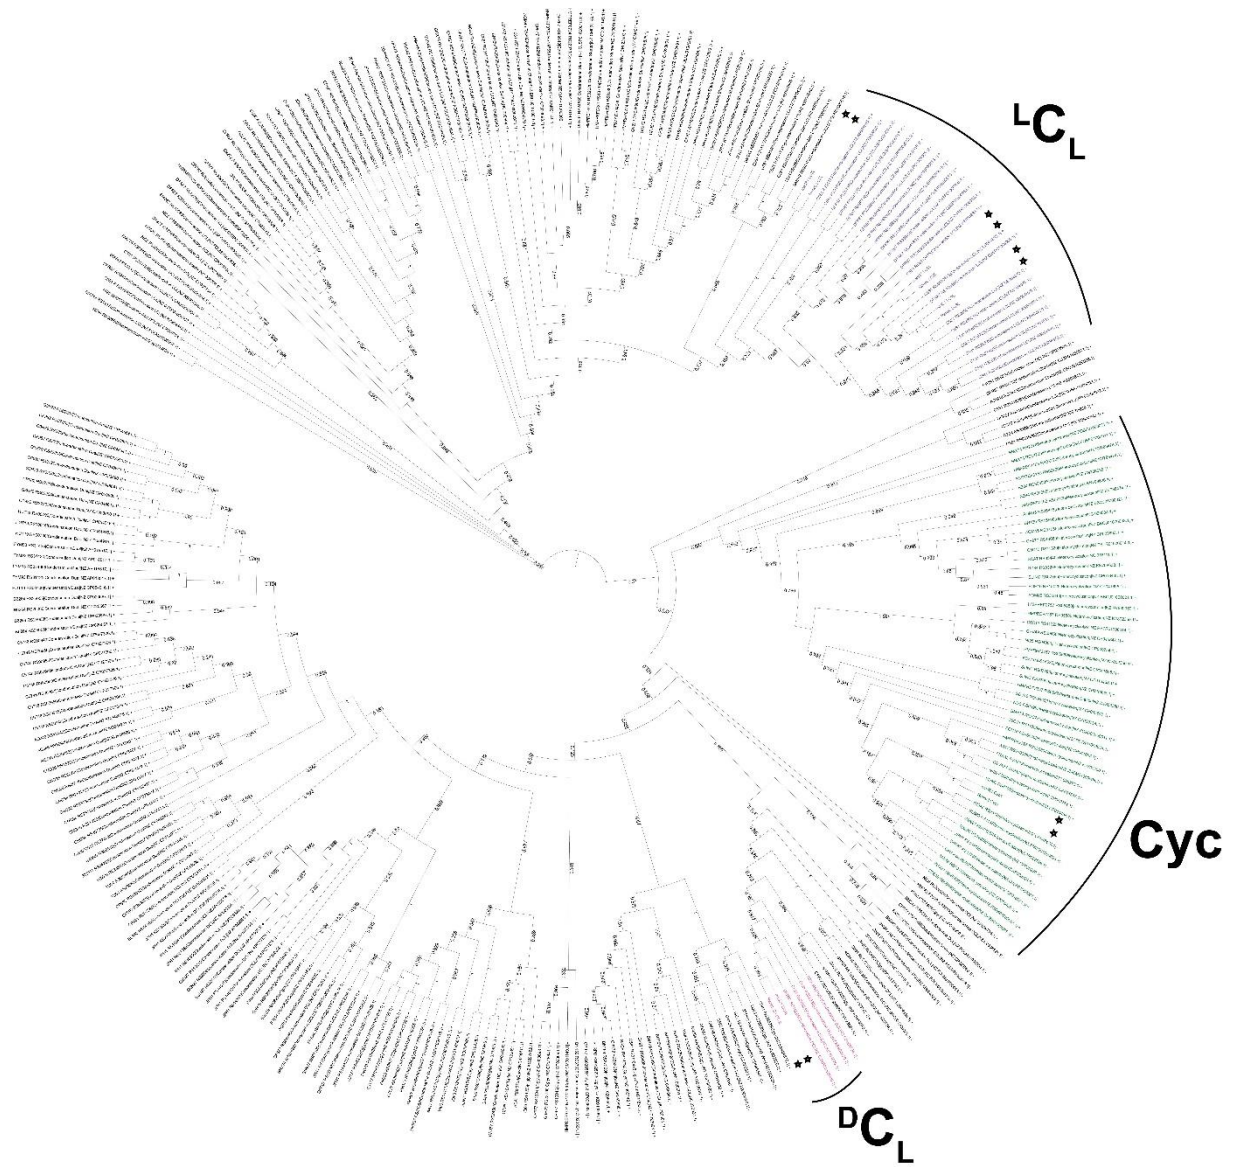

**Figure S75.** Phylogenetic analysis of Condensation Domains (C-domains of the *rene* cluster and the *mad* cluster are marked with a star). C-domains were aligned using ClustalW. The tree was created with fastree 2 (green: heterocyclization domains marked with Cyc; pink: condensation domains for the condensation of a D- and an L-amino acid ( $^D C_L$ ), blue: Condensation domains for the condensation of two L-amino acids ( $^L C_L$ ).

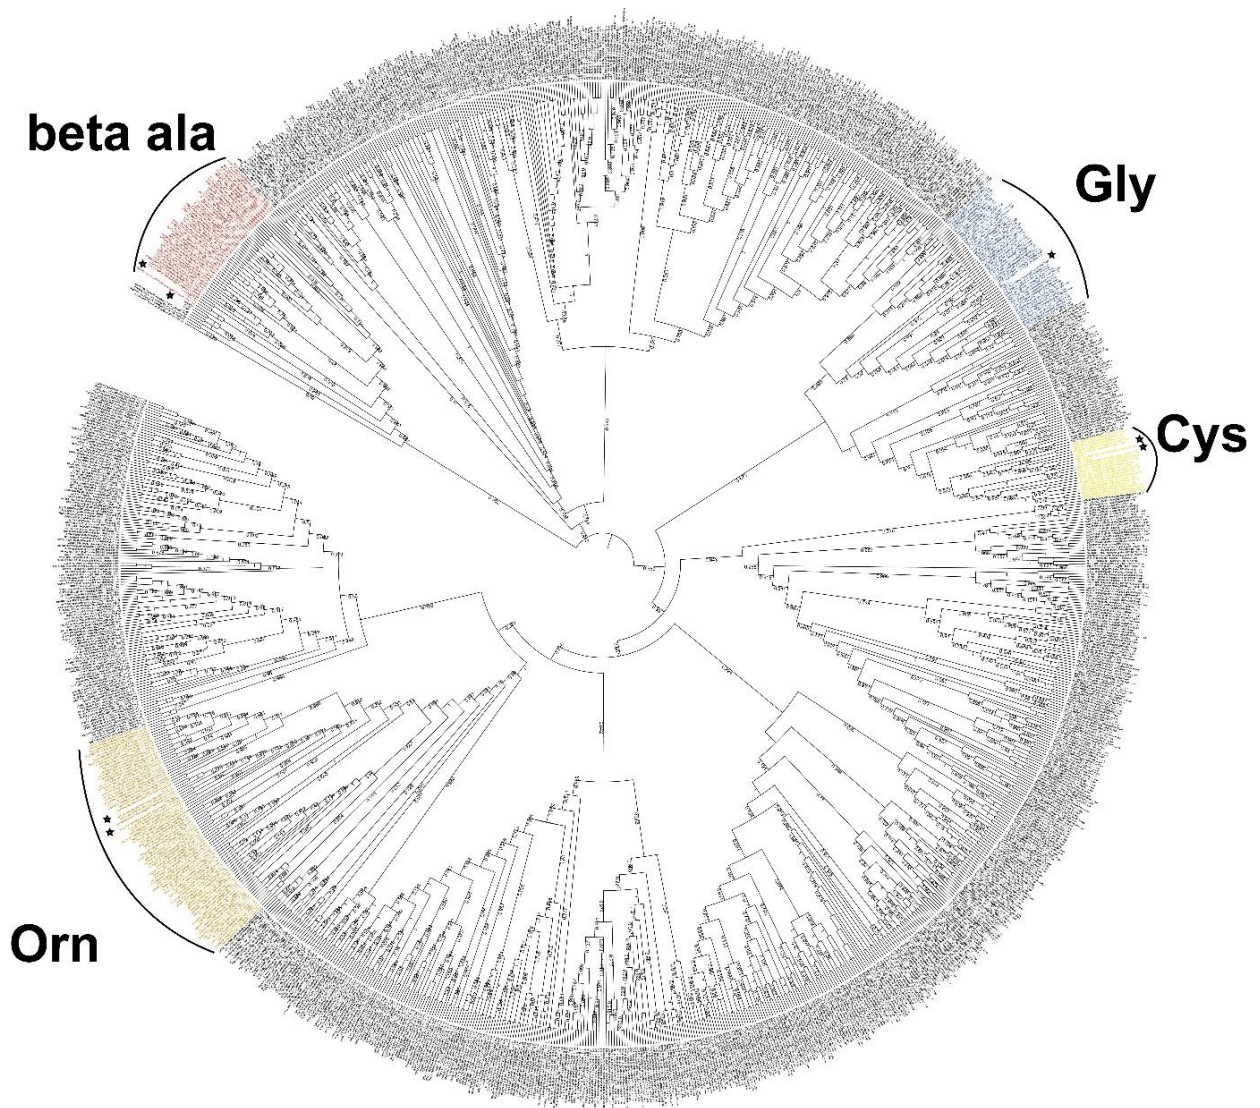

**Figure S76.** Phylogenetic analysis of Adenylation Domains (A-domains of the *rene* cluster and the *mad* cluster are marked with a star). A-domains were aligned using ClustalW. The tree was created with fastree 2 (yellow: A-domains with a specificity of Cys, blue: A-domains for glycine, orange: ornithine and derivatives thereof, red: beta-alanine)

**Table S12.** Top BLAST hits of genes in genomic region of putative madurastatin cluster in *Actinomadura* sp. RB99

| Protein Name                                                                | size (AA) | Closest Homolog(s) <sup>a</sup>                                         | Annotation                                                                                                                                                                                                                                                                                                                                                                                   | Identity (%) / Alignment length (%) <sup>b</sup>                     | Accession number                                                                 |
|-----------------------------------------------------------------------------|-----------|-------------------------------------------------------------------------|----------------------------------------------------------------------------------------------------------------------------------------------------------------------------------------------------------------------------------------------------------------------------------------------------------------------------------------------------------------------------------------------|----------------------------------------------------------------------|----------------------------------------------------------------------------------|
| RB99_01611<br>hypothetical protein                                          | 437       | F9B16_25520<br>F8568_RS34155<br>ACTIVE_0127                             | acyltransferase family protein <i>Actinomadura montaniterrae</i><br>acyltransferase family protein <i>Actinomadura</i> sp. LD22<br>acyltransferase family protein <i>Actinomadura verrucosospora</i>                                                                                                                                                                                         | 94.39/93<br>93.51/95<br>95.85/93.1                                   | KAB2376107<br>WP_151597828<br>WP_173091757.1                                     |
| RB99_01612<br>hypothetical protein                                          | 402       | F8568_RS34160<br>F9B16_RS25530<br>ACTIVE_0126                           | helix-turn-helix domain-containing protein <i>Actinomadura</i> sp. LD22<br>helix-turn-helix domain-containing protein <i>Actinomadura montaniterrae</i><br>putative PucR family transcriptional regulator <i>Actinomadura verrucosospora</i>                                                                                                                                                 | 96.12/96<br>96.12/100<br>95.02/100                                   | WP_151597838<br>WP_151542657<br>QKG18492                                         |
| RB99_01613<br>hypothetical protein                                          | 299       | F9B16_RS25535<br>ACTIVE_0125<br>ERS075342_07230                         | esterase <i>Actinomadura montaniterrae</i><br>esterase <i>Actinomadura verrucosospora</i><br>esterase <i>Mycobacterium tuberculosis</i>                                                                                                                                                                                                                                                      | 89.85/88<br>89.26/99<br>79.19/99                                     | WP_151542664<br>QKG18491<br>CNG48089                                             |
| RB99_01614<br>hypothetical protein                                          | 293       | F9B16_RS25540<br>ACTIVE_0124<br>F8568_RS34170                           | DMT family transporter <i>Actinomadura montaniterrae</i><br>DMT family transporter <i>Actinomadura verrucosospora</i><br>DMT family transporter <i>Actinomadura</i> sp. LD22                                                                                                                                                                                                                 | 96.92/99<br>95.56/100<br>94.18/99                                    | WP_151542658<br>WP_173091753<br>WP_151597829                                     |
| RB99_01615<br>putative diacylglycerol O-acyltransferase tgs3                | 640       | F8568_RS34175<br>ACTIVE_0123<br>DTB52_RS20895                           | phosphatase PAP2 family protein <i>Actinomadura</i> sp. LD22<br>phosphatase PAP2 family protein <i>Actinomadura verrucosospora</i><br>phosphatase PAP2 family protein <i>Actinomadura madurae</i>                                                                                                                                                                                            | 74.49/100<br>59.71/99<br>59.71/99                                    | WP_151597830<br>WP_173091751<br>WP_111831501                                     |
| RB99_01616<br>hypothetical protein                                          | 291       | F9B16_RS40675<br>ACTIVE_0122<br>C4U03_RS16735<br>orf-4<br>RdmB<br>Orf15 | SAM-dependent methyltransferase <i>Actinomadura montaniterrae</i><br>SAM-dependent methyltransferase <i>Actinomadura verrucosospora</i><br>SAM-dependent methyltransferase <i>Actinomadura echinospora</i><br>s-adenosyl methyltransferase <i>Actinomadura</i> sp. ATCC 39365<br>S-adenosyl methyltransferase <i>Streptomyces</i> sp.<br>methyltransferase <i>Actinoplanes garbadinensis</i> | 92.99/93<br>86.96/93<br>60.44/93<br>54.47/87<br>48.45/88<br>46.03/86 | WP_151545595<br>WP_173091749<br>WP_103938709<br>AKQ99279<br>AWW87417<br>ACR33048 |
| RB99_01617<br>hypothetical protein                                          | 103       | ACTIVE_0121<br>F9B16_RS40670<br>AA75_RS35610                            | hypothetical protein ACTIVE_0121 <i>Actinomadura verrucosospora</i><br>hypothetical protein <i>Actinomadura montaniterrae</i><br>hypothetical protein <i>Kitasatospora</i> sp. MBT63                                                                                                                                                                                                         | 86.73/95<br>94.52/70<br>72.53/86                                     | QKG18487<br>WP_151545600<br>WP_033824513                                         |
| RB99_01618<br>Benzoate 1,2-dioxygenase electron transfer component          | 234       | F9B16_40660<br>F8568_034235<br>ACTIVE_0120                              | Oxidoreductase <i>Actinomadura montaniterrae</i><br>oxidoreductase <i>Actinomadura</i> sp. LD22<br>oxidoreductase FAD/NAD(P)-binding domain-containing protein <i>Actinomadura verrucosospora</i>                                                                                                                                                                                            | 94.02/100<br>92.31/100<br>91.45/100                                  | WP_151545594<br>WP_151597213.1<br>QKG18486                                       |
| RB99_01619<br>Putative protein-methionine-sulfoxide reductase subunit YedZ1 | 199       | F9B16_RS40660<br>F8568_RS34190<br>ACTIVE_0119<br>yuiH                   | molybdopterin-dependent oxidoreductase <i>Actinomadura montaniterrae</i><br>sulfite oxidase-like oxidoreductase <i>Actinomadura</i> sp. LD22<br>molybdopterin-dependent oxidoreductase <i>Actinomadura verrucosospora</i><br>putative molybdopterin containing enzyme subunit <i>Bacillus subtilis</i> subsp. <i>subtilis</i> str. 168                                                       | 93.47/100<br>91.96/100<br>91.46/100<br>42.64/96                      | WP_151545593<br>WP_151597212<br>WP_173091745.1<br>CAB15192                       |
| RB99_01620<br>Ribonuclease BN                                               | 357       | F9B16_40650<br>A2W34_02445<br>GEU28_04040                               | MBL fold metallo-hydrolase <i>Actinomadura montaniterrae</i><br>MBL fold metallo-hydrolase <i>Chloroflexi</i> bacterium RBG_16_64_32<br>MBL fold metallo-hydrolase <i>Dehalococcoidia</i> bacterium                                                                                                                                                                                          | 95.52/100<br>63.19/91<br>59.63/91                                    | WP_151545592.1<br>OGO46291.1<br>MPZ22713.1                                       |
| RB99_01622<br>hypothetical protein                                          | 575       | F9B16_RS40645<br>F8568_RS34200<br>ACTIVE_0118                           | ankyrin repeat domain-containing protein <i>Actinomadura montaniterrae</i><br>ankyrin repeat domain-containing protein <i>Actinomadura</i> sp. LD22<br>ankyrin repeat domain-containing protein <i>Actinomadura verrucosospora</i>                                                                                                                                                           | 88.68/99<br>88.3/99<br>83.77/99                                      | WP_151545599.1<br>WP_151597226.1<br>WP_173091743                                 |
| RB99_01623<br>HTH-type transcriptional repressor KstR2 (kstR2_2)            | 201       | F9B16_RS40615<br>F8568_RS34230<br>ACTIVE_0117                           | TetR family transcriptional regulator <i>Actinomadura montaniterrae</i><br>TetR family transcriptional regulator <i>Actinomadura</i> sp. LD22<br>TetR family transcriptional regulator <i>Actinomadura verrucosospora</i>                                                                                                                                                                    | 97.5//97<br>95.5/99<br>92.42/98                                      | WP_151545597<br>WP_151597206.1<br>QKG18483                                       |
| RB99_01624 3-methylmercaptopyruvate-CoA                                     | 548       | F8568_030915<br>ACTIVE_0116                                             | long-chain-fatty-acid--CoA ligase <i>Actinomadura</i> sp. LD22<br>atty-acid--CoA ligase FadD14 <i>Actinomadura verrucosospora</i>                                                                                                                                                                                                                                                            | 97.45/100<br>97.45/100                                               | WP_151597205<br>QKG18482                                                         |

|                                                                                     |     |                                                                                                |                                                                                                                                                                                                                                                                                                                                                                                                                                                                                                                                                                          |                                                                                  |                                                                                              |
|-------------------------------------------------------------------------------------|-----|------------------------------------------------------------------------------------------------|--------------------------------------------------------------------------------------------------------------------------------------------------------------------------------------------------------------------------------------------------------------------------------------------------------------------------------------------------------------------------------------------------------------------------------------------------------------------------------------------------------------------------------------------------------------------------|----------------------------------------------------------------------------------|----------------------------------------------------------------------------------------------|
| ligase<br><b>(reneA)</b>                                                            |     | F9B16_RS40610<br>norE<br>aurE                                                                  | long-chain-fatty-acid--CoA ligase <i>Actinomadura montaniterrae</i><br>aryl-coA ligase <i>Streptomyces orinoci</i><br>putative acyl-coA ligase <i>Streptomyces thioluteus</i>                                                                                                                                                                                                                                                                                                                                                                                            | 97.63/100<br>32.7/97<br>32.34/89                                                 | WP_151545587<br>CAO85890<br>CAE02600                                                         |
| RB99_01625<br>putative enoyl-CoA hydratase<br>1<br><b>(reneB)</b>                   | 150 | F9B16_RS40605<br>ACTIVE_0115<br>F8568_RS34240<br>htdZ<br>iga16<br>salS<br>Strop_1034           | MaoC family dehydratase N-terminal domain-containing protein <i>Actinomadura montaniterrae</i><br>MaoC family dehydratase N-terminal domain-containing protein <i>Actinomadura verrucosospora</i><br>MaoC family dehydratase N-terminal domain-containing protein <i>Actinomadura</i> sp. LD22<br>3-hydroxyacyl-thioester dehydratase <i>Z Mycobacterium tuberculosis</i> (strain CDC 1551 / Oshkosh)<br>MaoC dehydratase <i>Streptomyces</i> sp. MSC090213JE08<br>SalS <i>Salinispora tropica</i><br>MaoC domain protein dehydratase <i>Salinispora tropica</i> CNB-440 | 94/100<br>94/100<br>90.6/99<br>59.7/74.3<br>56.29/99<br>55.38/86<br>55.38/86     | WP_151545586<br>WP_173091741<br>WP_151597204<br>P9WNP2<br>BAX64257<br>ABP73636<br>ABP53508   |
| RB99_01626 rebeB<br>Putative aminoglycoside<br>phosphotransferase<br><b>(reneC)</b> | 346 | F8568_RS34245<br>F9B16_RS40600<br>ACTIVE_0114<br>UMAG_06422<br>MF437311.1:15219..16346<br>rsIP | phosphotransferase <i>Actinomadura</i> sp. LD22<br>phosphotransferase <i>Actinomadura montaniterrae</i><br>aminoglycoside phosphotransferase <i>Actinomadura verrucosospora</i><br>hypothetical protein UMAG_06422 <i>Ustilago maydis</i> 521<br>phosphotransferase <i>Streptomyces olivaceus</i><br>putative phosphotransferase <i>Streptomyces bottropensis</i>                                                                                                                                                                                                        | 93.06/100<br>93.06/100<br>91.1/100<br>34.13/83<br>34.5/71<br>32.72/80            | WP_151597203<br>WP_151545596<br>QKG18480<br>XP_011392706<br>AWM72912<br>AHL46718             |
| RB99_01627<br>hypothetical protein<br><b>(reneD)</b>                                | 113 | H7233_02665<br>H7323_08775<br>IEZ08_RS11290                                                    | aldehyde dehydrogenase family protein <i>Pseudorhodobacter</i> sp.<br>aldehyde dehydrogenase family protein <i>Frankiales</i> bacterium<br>aldehyde dehydrogenase family protein <i>Planobispora rosea</i>                                                                                                                                                                                                                                                                                                                                                               | 48.45/85<br>50/88<br>49/88                                                       | MBC7677880<br>MBC7374068<br>WP_068922388                                                     |
| RB99_01628<br>Multidrug resistance protein<br>MdtG' <b>(reneE)</b>                  | 560 | F9B16_RS23765<br>F8568_RS34255<br>ACTIVE_0112                                                  | MFS transporter <i>Actinomadura montaniterrae</i><br>MFS transporter <i>Actinomadura</i> sp. LD22<br>MFS transporter <i>Actinomadura verrucosospora</i>                                                                                                                                                                                                                                                                                                                                                                                                                  | 96.61/100<br>95/100<br>93.39/100                                                 | WP_151542327<br>WP_151597201<br>WP_173091735                                                 |
| RB99_01629<br>Transcriptional regulator SlyA<br><b>(reneF)</b>                      | 155 | F9B16_RS23770<br>F8568_RS34260<br>ACTIVE_0111<br>pntR                                          | MarR family transcriptional regulator <i>Actinomadura montaniterrae</i><br>MarR family transcriptional regulator <i>Actinomadura</i> sp. LD22<br>MarR family transcriptional regulator <i>Actinomadura verrucosospora</i><br>PntR <i>Streptomyces arenae</i>                                                                                                                                                                                                                                                                                                             | 94.84/100<br>91.61/100<br>84.52/100<br>43.8/88                                   | WP_151542328<br>WP_151597200<br>WP_173091733<br>ADO85569                                     |
| RB99_01630<br>Multidrug efflux protein YfmO<br><b>(reneG)</b>                       | 422 | F9B16_RS23775<br>ACTIVE_0110<br>F8568_RS34265<br>yfmO<br>mem2<br>rkH<br>gilJ                   | MFS transporter <i>Actinomadura montaniterrae</i><br>MFS transporter <i>Actinomadura verrucosospora</i><br>MFS transporter <i>Actinomadura</i> sp. LD22<br>Multidrug efflux protein YfmO <i>Bacillus subtilis</i> strain 168)<br>Mem2 <i>Actinoplanes friuliensis</i><br>antibiotic efflux protein<br><i>Streptomyces</i> sp. 88-682 putative transmembrane efflux protein <i>Streptomyces griseoflavus</i>                                                                                                                                                              | 97.16/100<br>96/98<br>95.97/100<br>55.2/73.6<br>33.97/68<br>32.73/65<br>29.15/62 | WP_151542329<br>WP_173091731<br>WP_151597199<br>O06473<br>CAM56779<br>ACZ65473<br>AAP69589   |
| RB99_01631<br>hypothetical protein<br><b>(reneH)</b>                                | 290 | F8568_RS34270<br>F9B16_RS23780<br>ACTIVE_0109                                                  | hypothetical protein <i>Actinomadura</i> sp. LD22<br>hypothetical protein <i>Actinomadura montaniterrae</i><br>hypothetical protein <i>Actinomadura verrucosospora</i>                                                                                                                                                                                                                                                                                                                                                                                                   | 96.54/99<br>95.5/99<br>92.67/100                                                 | WP_151597198<br>WP_151542330<br>WP_173091729                                                 |
| RB99_01632<br>Protein MbtH<br><b>(reneI)</b>                                        | 65  | F9B16_RS23785<br>ACTIVE_0108<br>ETD83_RS12230<br>SSMG_02539<br>gobL<br>mbtH<br>tcp17           | MbtH family NRPS accessory protein <i>Actinomadura montaniterrae</i><br>MbtH-like protein <i>Actinomadura verrucosospora</i><br>MbtH family protein <i>Actinomadura</i> sp. 14C53<br>mbtH protein <i>Streptomyces</i> sp. AA4 amychelin cluster<br>MbtH <i>Streptomyces</i> sp. NRRL F-4415<br>Putative conserved protein MbtH <i>Mycobacterium tuberculosis H37Rv</i><br>MbtH-like short polypeptide <i>Actinoplanes teichomyceticus</i>                                                                                                                                | 90.77/100<br>89/92<br>89/90<br>62.5/98<br>66.15/100<br>69.35/87<br>76.56/98      | WP_151542331<br>QKG18474<br>WP_138645214<br>EFL06868<br>AGE11893.1<br>CCP45165.1<br>CAE53358 |
| RB99_01633<br>L-ornithine N(5)-<br>monooxygenase<br><b>(reneJ)</b>                  | 433 | F9B16_RS23790<br>F8568_RS34280<br>E1291_RS35040<br>SSMG_02546<br>gobT<br>SCO0498               | lysine N(6)-hydroxylase/L-ornithine N(5)-oxygenase family protein <i>Actinomadura montaniterrae</i><br>lysine N(6)-hydroxylase/L-ornithine N(5)-oxygenase family protein <i>Actinomadura</i> sp. LD22<br>SidA/lucD/PvdA family monooxygenase <i>Actinomadura verrucosospora</i><br>peptide monooxygenase <i>Streptomyces</i> sp. AA4 (amychelin cluster)<br>L-ornithine 5-monooxygenase <i>Streptomyces</i> sp. NRRL F-4415<br>putative peptide monooxygenase <i>Streptomyces coelicolor</i> A3(2)                                                                       | 95.15/100<br>94.92/100<br>93.3/100<br>59/94<br>57.55/94<br>61.41/95              | WP_151542332<br>WP_151597196<br>WP_173091725<br>EFL06875<br>AGE11900<br>CAB53328             |



|                                                                                            |      |                                                                                                                         |                                                                                                                                                                                                                                                                                                                                                                                                                                                                                                                                                                                                                                      |                                                                                                          |                                                                                                                              |
|--------------------------------------------------------------------------------------------|------|-------------------------------------------------------------------------------------------------------------------------|--------------------------------------------------------------------------------------------------------------------------------------------------------------------------------------------------------------------------------------------------------------------------------------------------------------------------------------------------------------------------------------------------------------------------------------------------------------------------------------------------------------------------------------------------------------------------------------------------------------------------------------|----------------------------------------------------------------------------------------------------------|------------------------------------------------------------------------------------------------------------------------------|
|                                                                                            |      | AMYAL_RS0130205                                                                                                         | SidA/lucD/PvdA family monooxygenase <i>Amycolatopsis alba</i>                                                                                                                                                                                                                                                                                                                                                                                                                                                                                                                                                                        | 59.77/97                                                                                                 | WP_039794392                                                                                                                 |
| RB99_01634<br>Putative ABC transporter substrate-binding lipoprotein YhfQ ( <i>reneK</i> ) | 338  | ACTIVE_0106<br>F8568_RS34285<br>F9B16_RS23795<br>E1291_RS35045<br>RHA1_ro02320<br>AMYAL_RS0130225<br>SCAB_85451         | ABC transporter substrate-binding protein <i>Actinomadura verrucosospora</i><br>ABC transporter substrate-binding protein <i>Actinomadura</i> sp. LD22<br>ABC transporter substrate-binding protein <i>Actinomadura montaniterrae</i><br>iron-siderophore ABC transporter substrate-binding protein <i>Actinomadura roseirufa</i><br>ABC Fe(3+) transporter, substrate binding component <i>Rhodococcus jostii</i> RHA1<br>iron-siderophore ABC transporter substrate-binding protein <i>Amycolatopsis alba</i><br>putative secreted siderophore-binding lipoprotein (transport system associated) <i>Streptomyces scabiei</i> 87.22 | 95.73/97<br>95.12/97<br>94.21/97<br>79.64/97<br>34.64/100<br>37.17/96<br>35.76/93                        | WP_173091723<br>WP_151597195<br>WP_151542333<br>WP_131742362<br>ABG94126<br>WP_020635022<br>CBG75490                         |
| RB99_01635<br>Tyrocidine synthase 3 ( <i>reneL</i> )                                       | 4036 | F9B16_RS23800<br>ACTIVE_0105<br>F8568_RS34290<br>E1300_RS26465<br>SCAB_85471<br>AMYAL_RS0130210<br>amcE<br>gobR<br>ilaS | amino acid adenylation domain-containing protein <i>Actinomadura montaniterrae</i><br>cyclic nucleotide binding protein <i>Actinomadura verrucosospora</i><br>amino acid adenylation domain-containing protein <i>Actinomadura</i> sp. LD22<br>amino acid adenylation domain-containing protein <i>Actinomadura fibrosa</i><br>putative NRPS/siderophore biosynthesis protein <i>Streptomyces scabiei</i> 87.22<br>non-ribosomal peptide synthetase <i>Amycolatopsis alba</i><br>nonribosomal peptide synthetase (amychelin cluster)<br>nonribosomal peptide synthetase<br>IlaS <i>Streptomyces atratus</i>                          | 92.56/99<br>92.06/99<br>91.94/99<br>81.52/99<br>45.38/99<br>46.62/99<br>43.41/89<br>43.41/89<br>40.19/99 | WP_151542334<br>QKG18471<br>WP_151597194<br>WP_131759779<br>CBG75492<br>WP_084702182<br>EFL06866.1<br>AGE11898.1<br>ASX95241 |
| RB99_01636<br>Salicylate synthase ( <i>reneM</i> )                                         | 436  | F9B16_RS23805<br>F8568_RS34295<br>ACTIVE_0104<br>SSMG_02545<br>DT87_RS23310<br>mbtI                                     | salicylate synthase <i>Actinomadura montaniterrae</i><br>salicylate synthase <i>Actinomadura</i> sp. LD22<br>Chorismate binding-like protein [ <i>Actinomadura verrucosospora</i> ]<br>salicylate synthase <i>Streptomyces</i> sp. AA4 (amychelin cluster)<br>MULTISPECIES: salicylate synthase unclassified <i>Streptomyces</i><br>Isochorismate synthase MbtI <i>Mycobacterium tuberculosis</i> H37Rv                                                                                                                                                                                                                              | 93.66/94<br>92.7/94<br>91.53/100<br>56.24/99<br>52.59/95<br>48.53/51                                     | WP_151542346<br>WP_151597225<br>QKG18470.1<br>EFL06874<br>WP_037880184<br>CCP45174.1                                         |
| RB99_01637<br>2,3-dihydroxybenzoate-AMP ligase ( <i>reneN</i> )                            | 537  | ACTIVE_0103<br>F9B16_RS23810<br>F8568_RS34300<br>SSMG_02542<br>gobK<br>mxcE<br>mbtA                                     | AMP-binding protein [ <i>Actinomadura verrucosospora</i> ]<br>AMP-binding protein <i>Actinomadura montaniterrae</i><br>AMP-binding protein <i>Actinomadura</i> sp. LD22<br>2,3-dihydroxybenzoate-AMP ligase <i>Streptomyces</i> sp. AA4 (amychelin cluster)<br>2,3-dihydroxybenzoate-AMP ligase <i>Streptomyces</i> sp. NRRL F-4415<br>MxcE <i>Stigmatella aurantiaca</i> Sg a15<br>Bifunctional enzyme MbtA: salicyl-AMP ligase (SAL-AMP ligase) + salicyl-S-ArCP synthetase<br><i>Mycobacterium tuberculosis</i> H37Rv                                                                                                             | 96.18/97<br>94.66/97<br>94.47/97<br>61.93/97<br>58.47/98<br>58.32/97<br>51.11/97                         | WP_173100878<br>WP_151542347<br>WP_151597224<br>EFL06871.1<br>AGE11892.1<br>AAG31128<br>CCP45172                             |
| RB99_01638<br>Aspartate 1-decarboxylase ( <i>reneO</i> )                                   | 135  | F8568_RS34305<br>ACTIVE_0102<br>F9B16_RS23815<br>kirD<br>RSAG_RS12240<br>crpG                                           | aspartate 1-decarboxylase <i>Actinomadura</i> sp. LD22<br>aspartate 1-decarboxylase <i>Actinomadura verrucosospora</i><br>aspartate 1-decarboxylase <i>Actinomadura montaniterrae</i><br>putative aspartate-1-decarboxylase precursor <i>Streptomyces collinus</i> Tu 365<br>MULTISPECIES: aspartate 1-decarboxylase Clostridiales<br>CrpG <i>Nostoc</i> sp. ATCC 53789                                                                                                                                                                                                                                                              | 97.04/100<br>93.3/100<br>96.3/100<br>62.5/94<br>56.14/84<br>44.74/84                                     | WP_151597223<br>WP_173091719<br>WP_151542335<br>CAN89641<br>WP_008704365<br>ABM21575                                         |
| RB99_01639<br>Enterobactin exporter EntS ( <i>reneP</i> )                                  | 428  | entS<br>entS<br>H4W34_005751<br>RER_27030<br>RHA1_ro02321<br>vabS<br>SSMG_02541                                         | enterobactin transporter EntS <i>Actinomadura montaniterrae</i><br>enterobactin transporter EntS <i>Actinomadura verrucosospora</i><br>ENTS family enterobactin (siderophore) exporter <i>Actinomadura algeriensis</i><br>putative siderophore export protein <i>Rhodococcus erythropolis</i> PR4<br>transporter, MFS superfamily protein <i>Rhodococcus jostii</i> RHA1<br>putative siderophore exporter <i>Vibrio anguillarum</i><br>major facilitator superfamily transporter multidrug resistance protein <i>Streptomyces</i> sp. AA4 (amychelin cluster)                                                                        | 91.12/100<br>91.2/100<br>81.19/98<br>45.48/92<br>44.29/97<br>40.51/99<br>38.48/92                        | WP_151542336<br>WP_173091717<br>MBE1535918<br>BAH33411<br>ABG94127<br>CAJ45638<br>EFL06870                                   |
| RB99_01640<br>Phenyloxazoline synthase                                                     | 1124 | F9B16_RS23825<br>F8568_RS30790                                                                                          | amino acid adenylation domain-containing protein <i>Actinomadura montaniterrae</i><br>amino acid adenylation domain-containing protein <i>Actinomadura</i> sp. LD22                                                                                                                                                                                                                                                                                                                                                                                                                                                                  | 93.86/99<br>93.05/99                                                                                     | WP_151542337<br>WP_151597192                                                                                                 |



|                                                                                  |     |                                                                                        |                                                                                                                                                                                                                                                                                                                                                                                                                                                                                                              |                                                                        |                                                                                      |
|----------------------------------------------------------------------------------|-----|----------------------------------------------------------------------------------------|--------------------------------------------------------------------------------------------------------------------------------------------------------------------------------------------------------------------------------------------------------------------------------------------------------------------------------------------------------------------------------------------------------------------------------------------------------------------------------------------------------------|------------------------------------------------------------------------|--------------------------------------------------------------------------------------|
| MbtB<br>( <i>reneQ</i> )                                                         |     | ACTIVE_0100<br>SSMG_02535<br>gobJ<br>nbtF<br>mbtB                                      | amino acid adenylation domain-containing protein <i>Actinomadura verrucosospora</i><br>non-ribosomal peptide synthetase <i>Streptomyces</i> sp. AA4 (amyachelin cluster)<br>nonribosomal peptide synthetase <i>Streptomyces</i> sp. NRRL F-4415<br>putative non-ribosomal peptide synthetase <i>Nocardia farcinica</i> IFM 10152<br>Phenyloxazoline synthase MbtB (phenyloxazoline synthetase) <i>Mycobacterium tuberculosis</i> H37Rv                                                                       | 92.97/99<br>59.41/98<br>57.2/99<br>53.12/99<br>48.89/99                | WP_173091715<br>EFL06864<br>AGE11891<br>BAD55613<br>CCP45171                         |
| RB99_01641<br>Ferric enterobactin transport system permease protein FepG         | 338 | ACTIVE_0099<br>F9B16_RS23830<br>E1285_RS43350<br>AMYAL_RS0130245<br>SSMG_02544<br>gobO | iron-siderophore uptake system transmembrane protein <i>Actinomadura verrucosospora</i><br>iron chelate uptake ABC transporter family permease subunit <i>Actinomadura montaniterrae</i><br>iron chelate uptake ABC transporter family permease subunit <i>Actinomadura</i> sp. 7K507<br>iron chelate uptake ABC transporter family permease subunit <i>Amycolatopsis alba</i><br>predicted protein <i>Streptomyces</i> sp. AA4 (amyachelin cluster)<br>ABC transporter <i>Streptomyces</i> sp. NRRL F-4415  | 94.97/100<br>95.85/99<br>85.67/99<br>51.83/97<br>51.16/93<br>47.51/88  | QKG18465<br>WP_151542338<br>WP_132160734<br>WP_039795885<br>EFL06873<br>AGE11896.1   |
| RB99_01642<br>Ferric enterobactin transport system permease protein FepD         | 353 | F8568_RS34325<br>F9B16_RS23835<br>ACTIVE_0098<br>AMYAL_RS0130240<br>SSMG_02543<br>gobP | iron chelate uptake ABC transporter family permease subunit <i>Actinomadura</i> sp. LD22<br>iron chelate uptake ABC transporter family permease subunit <i>Actinomadura montaniterrae</i><br>Fe3+-siderophore ABC transporter permease <i>Actinomadura verrucosospora</i><br>iron chelate uptake ABC transporter family permease subunit <i>Amycolatopsis alba</i><br>predicted protein <i>Streptomyces</i> sp. AA4 (amyachelin cluster)<br>iron siderophore transporter <i>Streptomyces</i> sp. NRRL F-4415 | 92.9/99<br>92.35/99<br>91.78/100<br>60.84/87<br>56.97/91<br>52.6/86    | WP_151597222<br>WP_151542348<br>QKG18464<br>WP_020635025<br>EFL06872<br>AGE11897     |
| RB99_01643<br>HTH-type transcriptional repressor AcnR                            | 230 | ACTIVE_0097<br>F9B16_RS23840<br>F8568_RS34330                                          | TetR family transcriptional regulator <i>Actinomadura verrucosospora</i><br>TetR family transcriptional regulator <i>Actinomadura montaniterrae</i><br>TetR family transcriptional regulator <i>Actinomadura</i> sp. LD22                                                                                                                                                                                                                                                                                    | 90.74/193<br>87.33/93<br>87.78/93                                      | QKG18463<br>WP_151542349<br>WP_151597221                                             |
| RB99_01644<br>Daunorubicin/doxorubicin resistance ATP-binding protein DrrA       | 305 | ACTIVE_0096<br>F8568_RS34335<br>DTB52_RS20675<br>tsn16<br>slnTI<br>F583_RS0124810      | ATP-binding cassette domain-containing protein <i>Actinomadura verrucosospora</i><br>ATP-binding cassette domain-containing protein <i>Actinomadura</i> sp. LD22<br>ABC transporter ATP-binding protein <i>Actinomadura madurae</i><br>putative ABC transporter, ATP binding component <i>Streptomyces longisporoflavus</i><br>putative ABC transporter ATP-binding protein <i>Streptomyces albus</i><br>ABC transporter ATP-binding protein <i>Salinispora arenicola</i>                                    | 94.75/100<br>93.11/100<br>90.17/96<br>68.71/96<br>67.01/94<br>59.46/98 | WP_173091711<br>WP_151597190<br>WP_021599067<br>ACR50788<br>AEZ53959<br>WP_019032750 |
| RB99_01645<br>hypothetical protein                                               | 545 | F9B16_RS23850<br>F8568_RS34340<br>ACTIVE_0095<br>tsn15<br>slnTII                       | ABC transporter permease <i>Actinomadura montaniterrae</i><br>ABC transporter permease <i>Actinomadura</i> sp. LD22<br>ABC transporter permease <i>Actinomadura verrucosospora</i><br>putative ABC transporter, membrane spanning protein <i>Streptomyces longisporoflavus</i><br>putative antibiotic ABC transporter efflux pump <i>Streptomyces albus</i>                                                                                                                                                  | 93.21/100<br>89.91/100<br>88.07/100<br>44.25/93<br>45.72/96            | WP_151542340<br>WP_151597189<br>WP_173091709<br>ACR50787<br>AEZ53960                 |
| RB99_01646<br>hypothetical protein                                               | 48  | ACTIVE_0094<br>E1293_RS47630<br>F4557_003456                                           | hypothetical protein <i>Actinomadura verrucosospora</i><br>hypothetical protein <i>Actinomadura darangshiensis</i><br>hypothetical protein <i>Actinomadura catellatispora</i>                                                                                                                                                                                                                                                                                                                                | 93.75/100<br>81.25/100<br>86.67/93                                     | WP_173091707<br>WP_165978368<br>MBB4775038                                           |
| RB99_01647<br>Toluene-4-sulfonate monooxygenase system iron-sulfur subunit Tsam1 | 340 | F9B16_RS23855<br>ACTIVE_0093<br>F8568_RS34345<br>ORF14<br>BamIOP4010DRAFT_038<br>1     | aromatic ring-hydroxylating dioxygenase subunit alpha <i>Actinomadura montaniterrae</i><br>Rieske 2Fe-2S domain-containing protein <i>Actinomadura verrucosospora</i><br>Rieske 2Fe-2S domain-containing protein <i>Actinomadura</i> sp. LD22<br>putative methylase <i>Streptomyces cinnabarinensis</i><br>Rieske (2Fe-2S) domain protein <i>Burkholderia ambifaria</i> IOP40-10                                                                                                                             | 94.71/100<br>94.12/100<br>94.41/100<br>41.19/98<br>35.21/98            | WP_151542341<br>WP_173091705<br>WP_151597188<br>CBW54656<br>EDT06079                 |
| RB99_01648<br>Transcriptional regulator KdgR                                     | 281 | F9B16_RS23860<br>F8568_RS34350<br>ACTIVE_0092<br>schA27<br>nbrR5<br>orf7               | helix-turn-helix domain-containing protein <i>Actinomadura montaniterrae</i><br>helix-turn-helix domain-containing protein <i>Actinomadura</i> sp. LD22<br>helix-turn-helix domain-containing protein <i>Actinomadura verrucosospora</i><br>putative transcriptional regulator <i>Streptomyces</i> sp. SCC 2136<br>IcIR family transcriptional regulator <i>Nocardia terpenica</i><br>transcriptional regulator <i>Streptomyces galbus</i>                                                                   | 92.88/100<br>90.39/100<br>91.76/95<br>60.17/85<br>32.18/71<br>31.3/94  | WP_151542342<br>WP_151597220<br>WP_173091703<br>CAH10127<br>AJ072706<br>ADE22342     |
| RB99_01649<br>Transcriptional repressor PaaX                                     | 319 | F9B16_RS23865<br>F8568_RS34355<br>ACTIVE_0091                                          | PaaX family transcriptional regulator <i>Actinomadura montaniterrae</i><br>PaaX family transcriptional regulator <i>Actinomadura</i> sp. LD22<br>PaaX family transcriptional regulator <i>Actinomadura verrucosospora</i>                                                                                                                                                                                                                                                                                    | 93.35/80<br>93.41/80<br>89.53/92                                       | WP_151542350<br>WP_151597219<br>WP_173091701                                         |

|                                                       |     |                                                                                                     |                                                                                                                                                                                                                                                                                                                                                                                                                                                                                                                                                                                                   |                                                                                     |                                                                                                  |
|-------------------------------------------------------|-----|-----------------------------------------------------------------------------------------------------|---------------------------------------------------------------------------------------------------------------------------------------------------------------------------------------------------------------------------------------------------------------------------------------------------------------------------------------------------------------------------------------------------------------------------------------------------------------------------------------------------------------------------------------------------------------------------------------------------|-------------------------------------------------------------------------------------|--------------------------------------------------------------------------------------------------|
|                                                       |     | schA31                                                                                              | phenyl acetic acid responsive transcriptional repressor <i>Streptomyces</i> sp. SCC 2136                                                                                                                                                                                                                                                                                                                                                                                                                                                                                                          | 54.83/80                                                                            | CAH10131.1                                                                                       |
| RB99_01650<br>HTH-type transcriptional regulator BetI | 206 | F9B16_RS23870<br>ACTIVE_0090<br>F8568_RS34360<br>cmxK                                               | TetR family transcriptional regulator <i>Actinomadura montaniterrae</i><br>TetR family transcriptional regulator <i>Actinomadura verrucosospora</i><br>TetR family transcriptional regulator <i>Actinomadura</i> sp. LD22<br>TetR family transcriptional regulator <i>Myxococcus</i> sp.                                                                                                                                                                                                                                                                                                          | 98.53/99<br>96.60/100<br>97.07/99<br>40.1/95                                        | WP_151542343<br>WP_173091699<br>WP_151597187<br>AXM43066                                         |
| RB99_01651<br>Oxygen sensor histidine kinase NreB     | 585 | F8568_RS34365<br>ACTIVE_0088<br>E1266_RS27640<br>DTB52_RS20610                                      | sensor histidine kinase <i>Actinomadura</i> sp. LD22<br>sensor histidine kinase <i>Actinomadura verrucosospora</i><br>sensor histidine kinase <i>Actinomadura</i> sp. 7K534<br>sensor histidine kinase <i>ctinomadura madurae</i>                                                                                                                                                                                                                                                                                                                                                                 | 88.21/100<br>88.10/99<br>72.6/99<br>42.21/59                                        | WP_151597186<br>WP_173091695<br>WP_111831483<br>ACN29724.1                                       |
| RB99_01652<br>Oxygen regulatory protein NreC          | 224 | F9B16_RS48755<br>F8568_RS34370<br>AL2_RS24065<br>MG459168.1:6235..6891<br>cal2<br>regC              | response regulator <i>Actinomadura montaniterrae</i><br>response regulator <i>Actinomadura</i> sp. LD22<br>response regulator transcription factor <i>Actinomadura latina</i><br>LuxR family DNA-binding response regulator <i>Streptomyces</i> sp. ID38640<br><i>Cal2 Streptomyces calvus</i><br>regulatory protein C <i>Actinoplanes friuliensis</i>                                                                                                                                                                                                                                            | 98.21/100<br>95.98/100<br>92.86/100<br>46.61/98<br>45.91/98<br>44.95/97             | WP_151547073<br>WP_151597185<br>WP_067637201<br>AVV61976.1<br>ALG65334.1<br>CAM56776             |
| RB99_01653<br>Oxygen sensor histidine kinase NreB     | 622 | F9B16_RS48760<br>ACTIVE_0086<br>F8568_RS34375<br>orf26<br>cal1<br>regD                              | hypothetical protein <i>Actinomadura montaniterrae</i><br>signal transduction histidine kinase <i>Actinomadura verrucosospora</i><br>hypothetical protein <i>Actinomadura</i> sp. LD22<br>two-component system sensor kinase <i>Nonomuraea longicatena</i><br><i>Cal1 Streptomyces calvus</i><br>regulatory protein D <i>Actinoplanes friuliensis</i>                                                                                                                                                                                                                                             | 94.28/97<br>90.59/96<br>90.76/96<br>38.58/50<br>35.07/46<br>33.33/42                | WP_151547074<br>QKG18452<br>WP_151597184<br>ACN29724<br>ALG65335<br>CAM56777                     |
| RB99_01654<br>Lactose operon repressor                | 362 | F8568_RS34380<br>F9B16_RS48765<br>ACTIVE_0085<br>chaR3<br>purR<br>Orf(-10)                          | substrate-binding domain-containing protein <i>Actinomadura</i> sp. LD22<br>substrate-binding domain-containing protein <i>Actinomadura montaniterrae</i><br>LacI family transcriptional regulator <i>Actinomadura verrucosospora</i><br>ChaR3 protein <i>Streptomyces chartreusis</i><br>LacI transcriptional regulator <i>Micromonospora chalcea</i> subsp. <i>Izumensis</i><br>LacI family transcriptional regulator <i>Streptomyces</i> sp. SCSIO 03032                                                                                                                                       | 98.2/92<br>97.6/92<br>97.2/88<br>52.35/82<br>49.85/93<br>53.89/59                   | WP_151597218<br>WP_151547077<br>QKG18451<br>CAH10185<br>ARW71474<br>ARP51731                     |
| RB99_01655<br>D-galactonate dehydratase               | 383 | F9B16_RS48770<br>ACTIVE_0084<br>F8568_RS34385<br>F8566_RS12900<br>orf1178<br>orf41<br>scontig008-48 | mandelate racemase/muconate lactonizing enzyme family protein <i>Actinomadura montaniterrae</i><br>mandelate racemase/muconate lactonizing enzyme family protein <i>Actinomadura verrucosospora</i><br>mandelate racemase/muconate lactonizing enzyme family protein <i>Actinomadura</i> sp. LD22<br>mandelate racemase/muconate lactonizing enzyme family protein <i>Actinomadura rudentiformis</i><br>putative dehydratase <i>Streptomyces kanamyceticus</i><br>isomerase <i>Streptomyces nanchangensis</i><br>mandelate racemase/muconate lactonizing protein <i>Streptomyces chromofuscus</i> | 97.65/100<br>96.61/100<br>96.87/100<br>85.22/98<br>76.34/96<br>28.85/90<br>28.01/95 | WP_151547075<br>WP_173091689<br>WP_151597183<br>WP_151560418<br>BAE95592<br>ADC45557<br>AEZ64556 |
| RB99_01656<br>2-deoxy-scylo-inosamine dehydrogenase   | 344 | F8568_RS30715<br>ACTIVE_0083<br>F8566_RS12895<br>kanT<br>aprE<br>live                               | alcohol dehydrogenase catalytic domain-containing protein <i>Actinomadura</i> sp. LD22<br>alcohol dehydrogenase GroES domain-containing protein <i>Actinomadura verrucosospora</i><br>alcohol dehydrogenase catalytic domain-containing protein <i>Actinomadura rudentiformis</i><br>putative dehydrogenase <i>Streptomyces kanamyceticus</i><br>putative 3-amino-2,3-dideoxy-scylo-inositol 1 dehydrogenase <i>Streptoalloteichus hindustanus</i><br>putative 3-amino-2,3-dideoxy-scylo-inositol 1-dehydrogenase <i>Streptomyces lividus</i>                                                     | 93.60/100<br>95.06/100<br>77.95/96<br>58.13/96<br>38.15/91<br>38.39/94              | WP_151597182<br>QKG18449<br>WP_151560417<br>BAE95593<br>CAI47653<br>CAG38695                     |

## 15. References

---

[1] Harada K.-i., Tomita K, Fujii K, Masuda K, Mikami Y, Yazawa K, Komaki H, Isolation and structural characterization of siderophores, madurastatins, produced by a pathogenic *Actinomadura madurae*. *The Journal of antibiotics* **2004**;57:125-135.

DOI: 10.7164/antibiotics.57.125

[2] Tsugawa H, Kind T, Nakabayashi R, Yukihiro D, Tanaka W, Cajka T, Saito K, Fiehn O, Arita M, Hydrogen rearrangement rules: computational MS/MS fragmentation and structure elucidation using MS-FINDER software. *Analytical chemistry* **2016**;88:7946-7958.

DOI: 10.1021/acs.analchem.6b00770

[3] Jung WH, Sham A, Lian T, Singh A, Kosman DJ, Kronstad JW. Iron source preference and regulation of iron uptake in *Cryptococcus neoformans*. *PLoS Pathog.* 2008;**4**:e45.

[4] Jung WH, Hu G, Kuo W, Kronstad JW. Role of ferroxidases in iron uptake and virulence of *Cryptococcus neoformans*. *Eukaryot Cell.* 2009;**8**:1511-1520.

[5] Wiebe C, Winkelmann G. Kinetic studies on the specificity of chelate-iron uptake in *Aspergillus*. *J Bacteriol.* 1975;**123**:837-842.

[6] Raymond-Bouchard I, Carroll CS, Nesbitt JR, Henry KA, Pinto LJ, Moizadeh M, *et al.* Structural requirements for the activity of the MirB ferrisiderophore transporter of *Aspergillus fumigatus*. *Eukaryot Cell.* 2012;**11**:1333-1344.

[7] Wayne P. Reference method for broth dilution antifungal susceptibility testing of yeasts, approved standard. *CLSI document M27-A2.* 2002.

[8] Larkin MA, Blackshields G, Brown NP, Chenna R, McGettigan PA, McWilliam H, Valentin F, Wallace IM, Wilm A, Lopez R, Thompson JD, Gibson TJ, Higgins DG, Clustal W and Clustal X version 2.0. *Bioinformatics* **2007**;23:2947-2948.

DOI: 10.1093/bioinformatics/btm404

[9] Price MN, Dehal PS, Arkin AP, FastTree 2—approximately maximum-likelihood trees for large alignments. *PloS one* **2010**;5:e9490.

DOI: 10.1371/journal.pone.0009490

[10] Afgan E, Baker D, Batut B, van den Beek M, Bouvier D, Čech M, Chilton J, Clements D, Coraor N, Grüning BA, Guerler A, Hillman-Jackson J, Hiltemann S, Jalili V, Rasche H, Soranzo N, Goecks J, Taylor J, Nekrutenko A, Blankenberg D, The Galaxy platform for accessible, reproducible and collaborative biomedical analyses: 2018 update. *Nucleic Acids Research* **2018**;46:W537-W544.

DOI: 10.1093/nar/gky379

[11] Blin K, Shaw S, Kautsar SA, Medema MH, Weber T, The antiSMASH database version 3: increased taxonomic coverage and new query features for modular enzymes. *Nucleic Acids Research* **2020**;49:D639-D643.

DOI: 10.1093/nar/gkaa978

[12] Letunic I, Bork P. Interactive Tree Of Life (iTOL) v5: an online tool for phylogenetic tree display and annotation. *Nucleic Acids Research* **2021**;49:W293-W296.

DOI: 10.1093/nar/gkab301

[13] Röttig, M.; Medema, M. H.; Blin, K.; Weber, T.; Rausch, C.; Kohlbacher, O., NRSPredictor2—a web server for predicting NRPS adenylation domain specificity. *Nucleic Acids Research* **2011**; 39: W362-W367.

DOI: 10.1093/nar/gkr323
